# Supplementary material for: Visible-light-promotedS-trifluoromethylation of thiophenols with trifluoromethyl phenyl sulfone
Source: Royal Society of Chemistry journal article supplement (doi:10.1039/d2cc03921d), 2022-01-01

# **Visible-Light-Promoted S-Trifluoromethylation of Thiophenols with Trifluoromethyl Phenyl Sulfone**

Zhiqiang Wei<sup>a,b</sup>, Zhengzhao Lou<sup>a,b</sup>, Chuangfa Ni<sup>a</sup>, Wei Zhang<sup>a</sup>, and Jinbo Hu<sup>\*a,b</sup>

<sup>[a]</sup>Key Laboratory of Organofluorine Chemistry, Center for Excellence in Molecular Synthesis, Shanghai Institute of Organic Chemistry, University of Chinese Academy of Sciences, Chinese Academy of Sciences, 345 Ling-Ling Road, Shanghai 200032, China.

<sup>[b]</sup>School of Physical Science and Technology, ShanghaiTech University, 100 Haike Road, Shanghai 201210, China.

E-mail: jinbohu@sioc.ac.cn

## Table of Contents

|                                                                                                    |    |
|----------------------------------------------------------------------------------------------------|----|
| <b>1. General Information</b> .....                                                                | 2  |
| <b>2. Synthesis of the Substrates</b> .....                                                        | 3  |
| <b>3. Optimization of the Reaction Conditions</b> .....                                            | 4  |
| <b>4. Perfluoroalkylation of Arylthiophenol with Perfluoroalkylphenyl Sulfones</b> .....           | 5  |
| <b>5. Preparation of Trifluoromethyl-heteroaryl Sulfones</b> .....                                 | 16 |
| <b>6. Cyclic Voltammetry Study</b> .....                                                           | 18 |
| <b>7. References</b> .....                                                                         | 20 |
| <b>8. <sup>1</sup>H, <sup>19</sup>F and <sup>13</sup>C NMR Spectra of Isolated Compounds</b> ..... | 21 |

## 1. General Information

Unless otherwise mentioned, all solvents and reagents are purchased from commercial sources and used as received. Tetrahydrofuran (THF), *N,N*-dimethylformamide (DMF) were dried by passing through a solvent purification system.  $^1\text{H}$  NMR spectra were recorded at 400 MHz.  $^{19}\text{F}$  NMR spectra were recorded at 376 MHz.  $^{13}\text{C}$  NMR spectra were recorded at 101 MHz.  $^1\text{H}$  NMR chemical shifts were determined relative to internal  $(\text{CH}_3)_4\text{Si}$  (TMS) at  $\delta$  0.00 ppm or to the signal of the residual protonated solvent:  $\text{CDCl}_3$  at  $\delta$  7.26 ppm.  $^{19}\text{F}$  NMR chemical shifts were determined relative to internal or external  $\text{CFCl}_3$  at  $\delta$  0.00 ppm.  $^{13}\text{C}$  NMR chemical shifts were determined relative to the signal of the solvent:  $\text{CDCl}_3$  at  $\delta$  77.16 ppm. Data for  $^1\text{H}$ ,  $^{13}\text{C}$ ,  $^{19}\text{F}$  NMR were recorded as follows: chemical shift ( $\delta$ , ppm), multiplicity (s = singlet, d = doublet, t = triplet, m = multiplet, q = quartet, dd = doublet of doublets, dt = doublet of triplets, td = triplet of doublets, qt = quartet of triplets, tq = triplet of quartets, br = broad, hept = heptet). Mass spectra were obtained on a mass spectrometer. High-resolution mass data were recorded on a high-resolution mass spectrometer. The LEDs were manufactured by Zhejiang Gulinwa Electronic Corporation.

## 2. Synthesis of Substrate (1x)

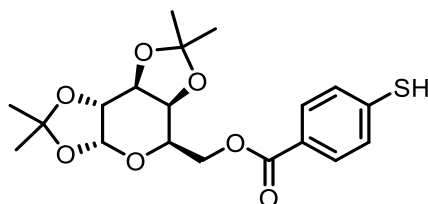

Colorless oil. The synthesis of this compound refers to this literature.<sup>1</sup>

**((3aR,5R,5aS,8aS,8bR)-2,2,7,7-tetramethyltetrahydro-5H-bis([1,3]dioxolo)[4,5-b:4',5'-d]pyran-5-yl)methyl 4-mercaptobenzoate (1x).** <sup>1</sup>H NMR (400 MHz, CDCl<sub>3</sub>)  $\delta$  7.88 (d,  $J = 8.4$  Hz, 2H), 7.25 (d,  $J = 8.3$  Hz, 2H), 5.54 (d,  $J = 5.0$  Hz, 1H), 4.63 (dd,  $J = 7.9, 2.5$  Hz, 1H), 4.49 (dd,  $J = 11.5, 4.8$  Hz, 1H), 4.38 (dd,  $J = 11.5, 7.6$  Hz, 1H), 4.33 (dd,  $J = 5.0, 2.5$  Hz, 1H), 4.29 (dd,  $J = 7.9, 1.9$  Hz, 1H), 4.14 (ddd,  $J = 7.1, 4.8, 1.9$  Hz, 1H), 3.59 (s, 3H), 1.49 (s, 3H), 1.45 (s, 3H), 1.33 (s, 3H), 1.31 (s, 3H). <sup>13</sup>C NMR (101 MHz, CDCl<sub>3</sub>)  $\delta$  165.9, 138.4, 130.3, 128.1, 127.0, 109.7, 108.8, 96.3, 71.1, 70.7, 70.5, 66.2, 63.9, 26.02, 25.98, 25.0, 24.5. **MS** (ESI,  $m/z$ ): 397.0 (M+H<sup>+</sup>). **HRMS** (ESI): Calcd for C<sub>19</sub>H<sub>25</sub>O<sub>7</sub>S<sup>+</sup> (M+H<sup>+</sup>) 397.1316, found 397.1309. **IR** (film): 2987, 2934, 2558, 1716, 1595, 1404, 1382, 1273, 1212, 1007, 1069, 1007, 918, 899, 758, 733, 689, 512, 481 cm<sup>-1</sup>.

### 3. Optimization of the Reaction Conditions

#### Typical procedures for optimization of the reaction conditions

Under dry N<sub>2</sub> atmosphere, to sealed tube were added PhSO<sub>2</sub>CF<sub>3</sub> (**2a**) (0.6 mmol, 126.0 mg, 1.2 equiv), Cs<sub>2</sub>CO<sub>3</sub> (1.0 mmol, 325.0 mg, 2.0 equiv) and dry DMAc (5.0 mL), then PhSH (0.5 mmol, 55.0 mg, 1.0 equiv) was added. The mixture was irradiated by a 24 W blue LED for 24 h.

**Table 1** Survey of reaction conditions for trifluoromethylation of Arylthiophenol<sup>a</sup>

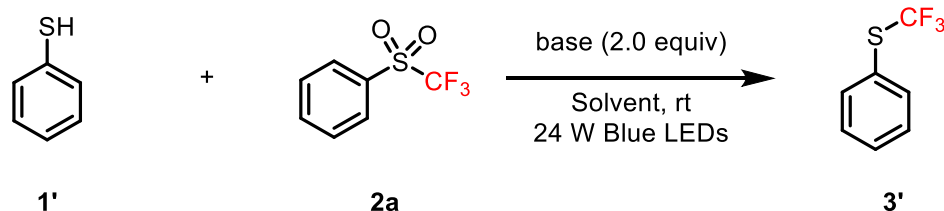

| Entry             | Solvent            | Time (h) | Base                            | Yield (%) <sup>[b]</sup> |
|-------------------|--------------------|----------|---------------------------------|--------------------------|
| 1 <sup>[c]</sup>  | DMF                | 12       | Cs <sub>2</sub> CO <sub>3</sub> | Trace                    |
| 2                 | DMF                | 12       | Cs <sub>2</sub> CO <sub>3</sub> | 61                       |
| 3                 | DMAc               | 12       | Cs <sub>2</sub> CO <sub>3</sub> | 72                       |
| 4                 | DMSO               | 12       | Cs <sub>2</sub> CO <sub>3</sub> | 33                       |
| 5                 | NMP                | 12       | Cs <sub>2</sub> CO <sub>3</sub> | 72                       |
| 6                 | DMPU               | 12       | Cs <sub>2</sub> CO <sub>3</sub> | 52                       |
| 7                 | CH <sub>3</sub> CN | 12       | Cs <sub>2</sub> CO <sub>3</sub> | 3                        |
| 8                 | DMAc               | 12       | K <sub>3</sub> PO <sub>4</sub>  | 64                       |
| 9                 | DMAc               | 12       | K <sub>2</sub> CO <sub>3</sub>  | 54                       |
| 10                | DMAc               | 12       | Na <sub>2</sub> CO <sub>3</sub> | 58                       |
| 11                | DMAc               | 12       | NaH                             | 61                       |
| 12                | DMAc               | 18       | Cs <sub>2</sub> CO <sub>3</sub> | 72                       |
| 13                | NMP                | 18       | Cs <sub>2</sub> CO <sub>3</sub> | 80                       |
| 14                | NMP                | 24       | Cs <sub>2</sub> CO <sub>3</sub> | 81                       |
| 15 <sup>[d]</sup> | NMP                | 24       | Cs <sub>2</sub> CO <sub>3</sub> | 81                       |
| 16 <sup>[e]</sup> | NMP                | 24       | Cs <sub>2</sub> CO <sub>3</sub> | 72                       |

<sup>a</sup>Reaction conditions : **1'** (0.5 mmol, 1.0 equiv), **2a** (0.6 mmol, 1.2 equiv), solvent (5.0 mL);

<sup>b</sup>Determined by <sup>19</sup>F NMR spectroscopy using trifluoromethoxybenzene as an internal standard.

<sup>c</sup>In dark environment; <sup>d</sup>**2a** (0.55 mmol, 1.1 equiv); <sup>e</sup>Under white light irradiation.

## 4. Perfluoroalkylation of Thiophenols with Perfluoroalkyl phenyl Sulfones

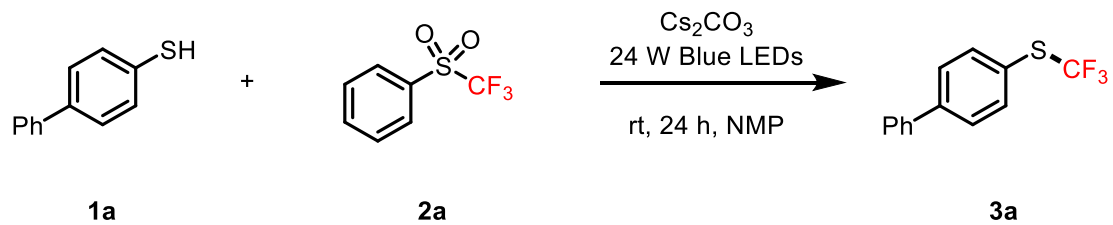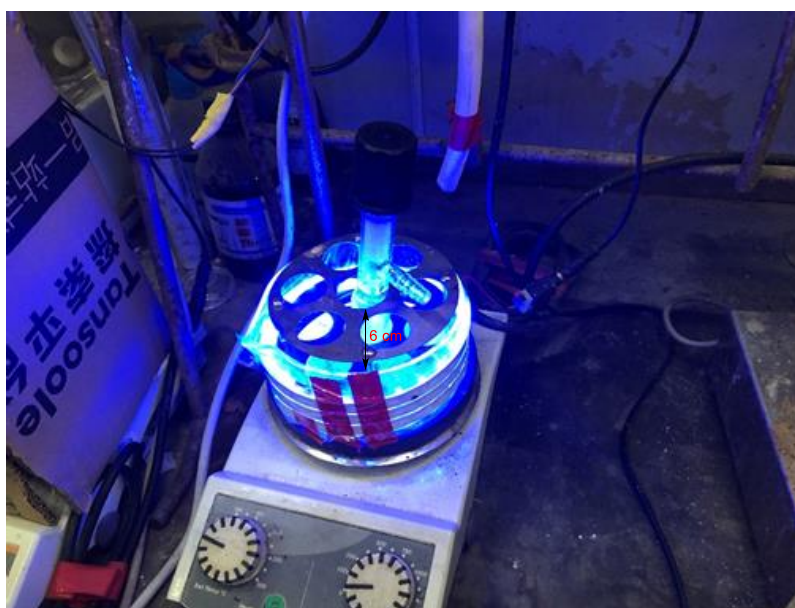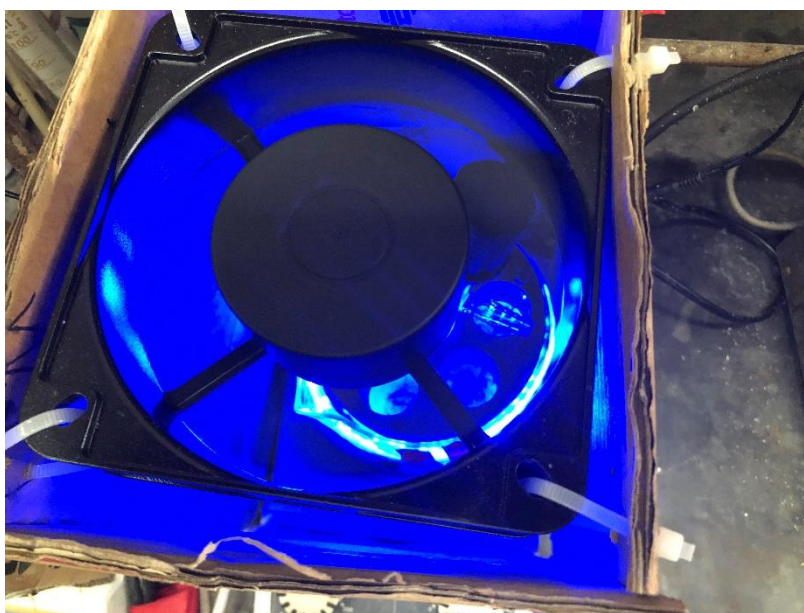

## Typical procedures

Under dry N<sub>2</sub> atmosphere, to sealed tube were added **1a** (0.50 mmol, 93.1 mg, 1.0 equiv), **2a** (0.55 mmol, 115.5 mg, 1.1 equiv), Cs<sub>2</sub>CO<sub>3</sub> (1.00 mmol, 325.0 mg, 2.0 equiv), dry NMP (5.00 mL). The mixture was irradiated by a 24 W blue LED for 24 h. After the completion of the reaction, the mixture was quenched by saturated NH<sub>4</sub>Cl solution, then the mixture was extracted with Et<sub>2</sub>O for 3 times. The organic phase was combined and dried over anhydrous MgSO<sub>4</sub>. The solvent was removed under reduced pressure and the residue was purified by column chromatography on silica gel by using petroleum ether as an eluent to provide **3a** as white solid (103.0 mg, 81%).

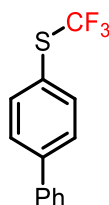

**[1,1'-Biphenyl]-4-yl(trifluoromethyl)sulfane (3a)** The product (103.2 mg, 81% yield) was purified with silica gel chromatography (Petroleum ether) as a white solid. <sup>1</sup>H NMR (400 MHz, CDCl<sub>3</sub>) δ 7.73 (d, *J* = 7.5 Hz, 2H), 7.65–7.59 (m, 4H), 7.48 (t, *J* = 7.7 Hz, 2H), 7.43–7.39 (m, 1H). <sup>19</sup>F NMR (376 MHz, CDCl<sub>3</sub>) δ -42.72 (s, 3F). <sup>13</sup>C NMR (101 MHz, CDCl<sub>3</sub>) δ 143.9, 139.7, 136.7, 129.7 (q, *J* = 309.4 Hz), 129.0, 128.19, 128.17, 127.3, 123.1 (q, *J* = 2.2 Hz). All the characterization data are consistent with previous report.<sup>2</sup>

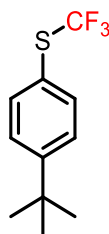

**(4-(tert-Butyl)phenyl)(trifluoromethyl)sulfane (3b)** The product (82.9 mg, 71% yield) was purified with silica gel chromatography (*n*-pentane) as a colorless liquid.

$^1\text{H NMR}$  (400 MHz,  $\text{CDCl}_3$ )  $\delta$  7.57 (d,  $J = 8.3$  Hz, 2H), 7.43 (d,  $J = 8.5$  Hz, 2H), 1.32 (s, 9H).  $^{19}\text{F NMR}$  (376 MHz,  $\text{CDCl}_3$ )  $\delta$  -43.03 (s, 3F).  $^{13}\text{C NMR}$  (101 MHz,  $\text{CDCl}_3$ )  $\delta$  154.4, 136.1, 129.7 (q,  $J = 307.9$  Hz), 126.6, 120.9 (q,  $J = 2.2$  Hz), 34.9, 31.1. All the characterization data are consistent with previous report.<sup>2</sup>

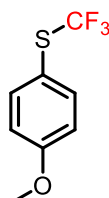

**(4-Methoxyphenyl)(trifluoromethyl)sulfane (3c)** The product (78.1 mg, 75% yield) was purified with silica gel chromatography (*n*-pentane) as a colorless liquid.  $^1\text{H NMR}$  (400 MHz,  $\text{CDCl}_3$ )  $\delta$  7.56 (d,  $J = 8.8$  Hz, 2H), 6.91 (d,  $J = 8.8$  Hz, 2H), 3.82 (s, 3H).  $^{19}\text{F NMR}$  (376 MHz,  $\text{CDCl}_3$ )  $\delta$  -43.99 (s, 3F).  $^{13}\text{C NMR}$  (101 MHz,  $\text{CDCl}_3$ )  $\delta$  161.9, 138.3, 129.6 (q,  $J = 308.2$  Hz), 115.0, 114.8 (q,  $J = 2.3$  Hz), 55.4. All the characterization data are consistent with previous report.<sup>2</sup>

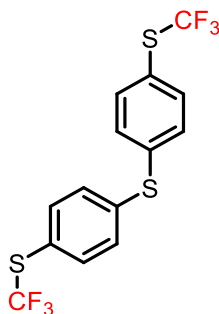

**Bis(4-((trifluoromethyl)thio)phenyl)sulfane (3d)** The product (187.4 mg, 97% yield) was purified with silica gel chromatography (Petroleum ether) as a colorless liquid.  $^1\text{H NMR}$  (400 MHz,  $\text{CDCl}_3$ )  $\delta$  7.59 (d,  $J = 8.3$  Hz, 4H), 7.36 (d,  $J = 8.4$  Hz, 4H).  $^{19}\text{F NMR}$  (376 MHz,  $\text{CDCl}_3$ )  $\delta$  -42.65 (s, 6F).  $^{13}\text{C NMR}$  (101 MHz,  $\text{CDCl}_3$ )  $\delta$  138.7, 137.0, 131.6, 129.4 (q,  $J = 308.3$  Hz), 123.55 (q,  $J = 2.3$  Hz). **MS** (EI,  $m/z$ ): 386 ( $\text{M}^+$ ). **HRMS** (EI): Calcd for  $\text{C}_{14}\text{H}_{28}\text{F}_6\text{S}_3^+$  ( $\text{M}^+$ ) 385.9687, found 385.9693. **IR** (film): 2927, 2852, 1571, 1476, 1391, 1119, 1088, 1013, 817, 756, 579, 504  $\text{cm}^{-1}$ .



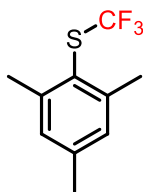

**Mesityl(trifluoromethyl)sulfane (3e)** The product (79.1 mg, 72% yield) was purified with silica gel chromatography (Petroleum ether) as a colorless liquid.  $^1\text{H}$  NMR (400 MHz,  $\text{CDCl}_3$ )  $\delta$  6.99 (s, 2H), 2.52 (s, 6H), 2.29 (s, 3H).  $^{19}\text{F}$  NMR (376 MHz,  $\text{CDCl}_3$ )  $\delta$  -41.99 (s, 3F).  $^{13}\text{C}$  NMR (101 MHz,  $\text{CDCl}_3$ )  $\delta$  145.3, 141.4, 130.2 (q,  $J = 309.3$  Hz), 129.6, 120.1 (q,  $J = 1.7$  Hz), 22.1, 21.1.<sup>3</sup>

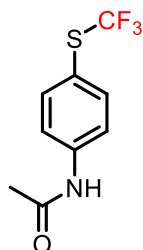

**N-(4-((Trifluoromethyl)thio)phenyl)acetamide (3f)** The product (88.0 mg, 75% yield) was purified with silica gel chromatography (PE:EA = 3:1 ) as a white solid.  $^1\text{H}$  NMR (400 MHz,  $\text{CD}_3\text{COCD}_3$ )  $\delta$  9.47 (s, 1H), 7.79 (d,  $J = 8.7$  Hz, 2H), 7.62 (d,  $J = 8.7$  Hz, 2H), 2.10 (s, 3H).  $^{19}\text{F}$  NMR (376 MHz,  $\text{CD}_3\text{COCD}_3$ )  $\delta$  -44.66 (s, 3F).  $^{13}\text{C}$  NMR (101 MHz,  $\text{CD}_3\text{COCD}_3$ )  $\delta$  168.6, 142.6, 137.3, 129.9 (q,  $J = 307.0$  Hz), 119.8, 116.4 (q,  $J = 2.2$  Hz), 23.5. All the characterization data are consistent with previous report.<sup>2</sup>

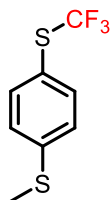

**Methyl(4-((trifluoromethyl)thio)phenyl)sulfane (3g)** The product (104.0 mg, 93% yield) was purified with silica gel chromatography (*n*-pentane) as a colorless liquid.  $^1\text{H}$  NMR (400 MHz,  $\text{CDCl}_3$ )  $\delta$  7.56 (d,  $J = 8.4$  Hz, 2H), 7.23 (d,  $J = 8.4$  Hz, 2H), 2.48 (s, 3H).  $^{19}\text{F}$  NMR (376 MHz,  $\text{CDCl}_3$ )  $\delta$  -43.30 (s, 3F).  $^{13}\text{C}$  NMR (101

MHz, CDCl<sub>3</sub>)  $\delta$  143.3, 136.7, 129.5 (q,  $J$  = 308.3 Hz), 126.3, 119.7 (q,  $J$  = 2.3 Hz), 15.0. All the characterization data are consistent with previous report.<sup>2</sup>

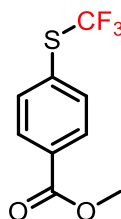

**Methyl 4-((trifluoromethyl)thio)benzoate (3h)** The product (107.7 mg, 91% yield) was purified with silica gel chromatography (PE:EA = 40:1) as a colorless liquid. <sup>1</sup>H NMR (400 MHz, CDCl<sub>3</sub>)  $\delta$  8.05 (d,  $J$  = 8.3 Hz, 2H), 7.70 (d,  $J$  = 8.1 Hz, 2H), 3.92 (s, 3H). <sup>19</sup>F NMR (376 MHz, CDCl<sub>3</sub>)  $\delta$  -41.88 (s, 3F). <sup>13</sup>C NMR (101 MHz, CDCl<sub>3</sub>)  $\delta$  166.1, 135.6, 132.2, 130.4, 129.9, 129.3 (q,  $J$  = 309.1 Hz), 52.5. All the characterization data are consistent with previous report.<sup>4</sup>

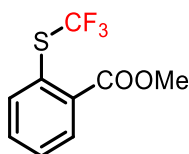

**Methyl 2-((trifluoromethyl)thio)benzoate (3i)** The product (91.3 mg, 77% yield) was purified with silica gel chromatography (PE:EA = 40:1) as a colorless liquid. <sup>1</sup>H NMR (400 MHz, CDCl<sub>3</sub>)  $\delta$  7.91 (d,  $J$  = 7.7 Hz, 1H), 7.73–7.71 (m, 1H), 7.54–7.50 (m, 1H), 7.44–7.40 (m, 1H), 3.92 (s, 3H). <sup>19</sup>F NMR (376 MHz, CDCl<sub>3</sub>)  $\delta$  -41.41 (s, 3F). <sup>13</sup>C NMR (101 MHz, CDCl<sub>3</sub>)  $\delta$  166.7, 132.72, 132.69 (q,  $J$  = 2.4 Hz), 132.5, 130.9, 129.5 (q,  $J$  = 310.1 Hz), 128.7, 128.3 (q,  $J$  = 2.3 Hz), 52.6. All the characterization data are consistent with previous report.<sup>5</sup>

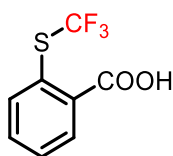

**2-((Trifluoromethyl)thio)benzoic acid (3j)** The product (63.4 mg, 57% yield) was purified with silica gel chromatography (PE:EA = 3:1) as a white solid. <sup>1</sup>H NMR

(400 MHz, CDCl<sub>3</sub>)  $\delta$  8.11 (dd,  $J = 7.8, 1.7$  Hz, 1H), 7.76 (d,  $J = 8.0$  Hz, 1H), 7.59 (td,  $J = 7.7, 1.7$  Hz, 1H), 7.46 (td,  $J = 7.6, 1.2$  Hz, 1H). **<sup>19</sup>F NMR** (376 MHz, CDCl<sub>3</sub>)  $\delta$  -41.23 (s, 3F). **<sup>13</sup>C NMR** (101 MHz, CDCl<sub>3</sub>)  $\delta$  171.2, 133.50, 132.1, 132.0 (q,  $J = 2.3$  Hz), 130.4, 130.0 (q,  $J = 2.3$  Hz), 129.5 (q,  $J = 310.1$  Hz), 128.44. All the characterization data are consistent with previous report.<sup>6</sup>

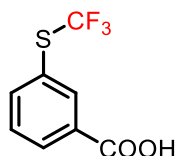

**2-((Trifluoromethyl)thio)benzoic acid (3k)** The product (90.2 mg, 81% yield) was purified with silica gel chromatography (PE:EA = 3:1) as a white solid. **<sup>1</sup>H NMR** (400 MHz, CDCl<sub>3</sub>)  $\delta$  8.40 (s, 1H), 8.23 (d,  $J = 7.8$  Hz, 1H), 7.90 (d,  $J = 7.9$  Hz, 1H), 7.56 (t,  $J = 7.8$  Hz, 1H). **<sup>19</sup>F NMR** (376 MHz, CDCl<sub>3</sub>)  $\delta$  -42.46 (s, 3F). **<sup>13</sup>C NMR** (101 MHz, CDCl<sub>3</sub>)  $\delta$  171.0, 141.3, 137.8, 132.5, 130.8, 129.8, 129.4 (q,  $J = 310.7$  Hz), 125.4 (q,  $J = 2.2$  Hz). All the characterization data are consistent with previous report.<sup>7</sup>

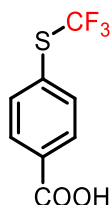

**4-((Trifluoromethyl)thio)benzoic acid (3l)** The product (90.1 mg, 81% yield) was purified with silica gel chromatography (PE:EA = 3:1) as a white solid. **<sup>1</sup>H NMR** (400 MHz, CDCl<sub>3</sub>)  $\delta$  8.14 (d,  $J = 8.4$  Hz, 2H), 7.75 (d,  $J = 8.3$  Hz, 2H). **<sup>19</sup>F NMR** (376 MHz, CDCl<sub>3</sub>)  $\delta$  -41.65 (s, 3F). **<sup>13</sup>C NMR** (101 MHz, CDCl<sub>3</sub>)  $\delta$  171.0, 135.5, 131.19, 131.16 (q,  $J = 2.3$  Hz), 131.0, 129.3 (q,  $J = 308.5$  Hz). All the characterization data are consistent with previous report.<sup>2</sup>

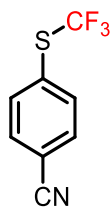

**4-((Trifluoromethyl)thio)benzonitrile (3m)** The product (90.1 mg, 81% yield) was purified with silica gel chromatography (PE:EA = 3:1) as a white solid.  $^1\text{H NMR}$  (400 MHz,  $\text{CDCl}_3$ )  $\delta$  7.75 (d,  $J = 8.1$  Hz, 2H), 7.70 (d,  $J = 8.6$  Hz, 2H).  $^{19}\text{F NMR}$  (376 MHz,  $\text{CDCl}_3$ )  $\delta$  -41.56 (s, 3F).  $^{13}\text{C NMR}$  (101 MHz,  $\text{CDCl}_3$ )  $\delta$  136.0, 132.9, 130.5, 129.0 (q,  $J = 309.9$  Hz), 117.6, 114.6. All the characterization data are consistent with previous report.<sup>2</sup>

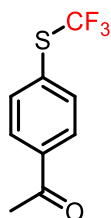

**1-(4-((Trifluoromethyl)thio)phenyl)ethan-1-one (3n)** The product (76.3 mg, 69% yield) was purified with silica gel chromatography (PE:EA = 40:1) as a colorless liquid.  $^1\text{H NMR}$  (400 MHz,  $\text{CDCl}_3$ )  $\delta$  7.97 (d,  $J = 8.3$  Hz, 2H), 7.73 (d,  $J = 8.1$  Hz, 2H), 2.61 (s, 3H).  $^{19}\text{F NMR}$  (376 MHz,  $\text{CDCl}_3$ )  $\delta$  -41.80 (s, 3F).  $^{13}\text{C NMR}$  (101 MHz,  $\text{CDCl}_3$ )  $\delta$  197.0, 138.5, 135.7, 130.8, 129.3 (q,  $J = 309.4$  Hz), 129.1, 26.7. All the characterization data are consistent with previous report.<sup>4</sup>

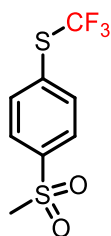

**(4-(Methylsulfonyl)phenyl)(trifluoromethyl)sulfane (3o)** The product (123.5 mg, 96% yield) was purified with silica gel chromatography (PE:EA = 4:1) as a white solid.  $^1\text{H NMR}$  (400 MHz,  $\text{CDCl}_3$ )  $\delta$  7.96 (d,  $J = 7.9$  Hz, 2H), 7.81 (d,  $J = 8.2$  Hz,

2H), 3.06 (s, 3H).  $^{19}\text{F}$  NMR (376 MHz,  $\text{CDCl}_3$ )  $\delta$  -41.47 (s, 3F).  $^{13}\text{C}$  NMR (101 MHz,  $\text{CDCl}_3$ )  $\delta$  142.7, 136.2, 131.4 (q,  $J = 2.3$  Hz), 129.1 (q,  $J = 309.1$  Hz), 128.3, 44.3. All the characterization data are consistent with previous report.<sup>8</sup>

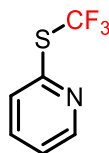

**2-((Trifluoromethyl)thio)pyridine (3p)** The product (72.4 mg, 81% yield) was purified with silica gel chromatography (*n*-pentane:Et<sub>2</sub>O = 20:1) as a colorless liquid.  $^1\text{H}$  NMR (400 MHz,  $\text{CDCl}_3$ )  $\delta$  8.61–8.59 (m, 1H), 7.71 (td,  $J = 7.7, 1.9$  Hz, 1H), 7.57 (d,  $J = 7.9$  Hz, 1H), 7.30 (ddd,  $J = 7.6, 4.8, 1.1$  Hz, 1H).  $^{19}\text{F}$  NMR (376 MHz,  $\text{CDCl}_3$ )  $\delta$  -40.22 (s, 3F).  $^{13}\text{C}$  NMR (101 MHz,  $\text{CDCl}_3$ )  $\delta$  150.7, 149.5 (q,  $J = 2.8$  Hz), 137.7, 129.4 (q,  $J = 309.1$  Hz), 128.2 (q,  $J = 1.9$  Hz), 123.80. All the characterization data are consistent with previous report.<sup>6</sup>

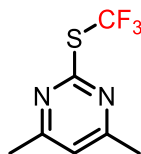

**4,6-Dimethyl-2-((trifluoromethyl)thio)pyrimidine (3q)** The product (89.3 mg, 86% yield) was purified with silica gel chromatography (PE:EA = 30:1) as a white solid.  $^1\text{H}$  NMR (400 MHz,  $\text{CDCl}_3$ )  $\delta$  6.84 (s, 1H), 2.42 (s, 6H).  $^{19}\text{F}$  NMR (376 MHz,  $\text{CDCl}_3$ )  $\delta$  -40.85 (s, 3F).  $^{13}\text{C}$  NMR (101 MHz,  $\text{CDCl}_3$ )  $\delta$  168.2, 164.5 (q,  $J = 3.1$  Hz), 128.4 (q,  $J = 307.5$  Hz), 118.1, 23.8. All the characterization data are consistent with previous report.<sup>9</sup>

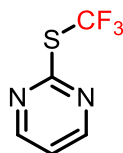

**2-((Trifluoromethyl)thio)pyrimidine (3r)** The product (83.1 mg, 92% yield) was purified with silica gel chromatography (*n*-pentane:Et<sub>2</sub>O = 20:1) as a colorless

liquid.  $^1\text{H NMR}$  (400 MHz,  $\text{CDCl}_3$ )  $\delta$  8.62 (d,  $J = 4.9$  Hz, 2H), 7.16 (t,  $J = 4.9$  Hz, 1H).  $^{19}\text{F NMR}$  (376 MHz,  $\text{CDCl}_3$ )  $\delta$  -41.10 (s, 3F).  $^{13}\text{C NMR}$  (101 MHz,  $\text{CDCl}_3$ )  $\delta$  165.9 (q,  $J = 3.2$  Hz), 158.0, 128.3 (q,  $J = 307.8$  Hz), 119.0. All the characterization data are consistent with previous report.<sup>2</sup>

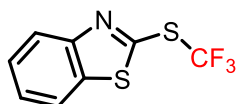

**2-((Trifluoromethyl)thio)benzo[d]thiazole (3s)** The product (88.3 mg, 75% yield) was purified with silica gel chromatography (PE) as a colorless liquid.  $^1\text{H NMR}$  (400 MHz,  $\text{CDCl}_3$ )  $\delta$  8.11 (dd,  $J = 8.1, 1.0$  Hz, 1H), 7.85 (d,  $J = 1.3$  Hz, 1H), 7.53 (ddd,  $J = 8.3, 7.2, 1.3$  Hz, 1H), 7.46 (ddd,  $J = 8.2, 7.2, 1.3$  Hz, 1H).  $^{19}\text{F NMR}$  (376 MHz,  $\text{CDCl}_3$ )  $\delta$  -40.22 (s, 3F).  $^{13}\text{C NMR}$  (101 MHz,  $\text{CDCl}_3$ )  $\delta$  153.1, 151.7 (q,  $J = 3.0$  Hz), 137.9, 128.2 (q,  $J = 312.1$  Hz), 127.0, 126.7, 124.1, 121.3. All the characterization data are consistent with previous report.<sup>2</sup>

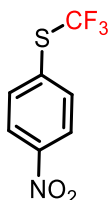

**(4-Nitrophenyl)(trifluoromethyl)sulfane (3t)** The product (40.0 mg, 36% yield) was purified with silica gel chromatography (PE) as a light yellow solid.  $^1\text{H NMR}$  (400 MHz,  $\text{CDCl}_3$ )  $\delta$  8.26 (d,  $J = 8.8$  Hz, 2H), 7.81 (d,  $J = 8.7$  Hz, 2H).  $^{19}\text{F NMR}$  (376 MHz,  $\text{CDCl}_3$ )  $\delta$  -41.39 (s, 3F).  $^{13}\text{C NMR}$  (101 MHz,  $\text{CDCl}_3$ )  $\delta$  149.2, 136.1, 132.6 (q,  $J = 2.4$  Hz), 129.0 (q,  $J = 308.8$  Hz), 124.4. All the characterization data are consistent with previous report.<sup>2</sup>

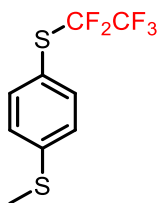

**Methyl(4-((perfluoroethyl)thio)phenyl)sulfane (3u)** The product (132.7 mg, 97% yield) was purified with silica gel chromatography (Petroleum ether) as a colorless liquid.  $^1\text{H NMR}$  (400 MHz,  $\text{CDCl}_3$ )  $\delta$  7.52 (d,  $J = 8.5$  Hz, 2H), 7.23 (d,  $J = 8.5$  Hz, 2H), 2.48 (s, 3H).  $^{19}\text{F NMR}$  (376 MHz,  $\text{CDCl}_3$ )  $\delta$  -82.50 (t,  $J = 3.5$  Hz, 3F), -92.31 (q,  $J = 3.7$  Hz, 2F).  $^{13}\text{C NMR}$  (101 MHz,  $\text{CDCl}_3$ )  $\delta$  143.7, 137.4, 126.2, 123.1–119.4 (m), 118.0 (t,  $J = 3.1$  Hz), 117.7–114.1 (m), 14.9. All the characterization data are consistent with previous report.<sup>10</sup>

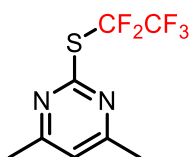

**4,6-Dimethyl-2-((perfluoroethyl)thio)pyrimidine (3v)** The product (84.1 mg, 65% yield) was purified with silica gel chromatography (PE:EA = 50:1) as a colorless liquid.  $^1\text{H NMR}$  (400 MHz,  $\text{CDCl}_3$ )  $\delta$  6.88 (s, 1H), 2.43 (s, 6H).  $^{19}\text{F NMR}$  (376 MHz,  $\text{CDCl}_3$ )  $\delta$  -82.86 (t,  $J = 3.3$  Hz, 3F), -92.73 (q,  $J = 3.5$  Hz, 2F).  $^{13}\text{C NMR}$  (101 MHz,  $\text{CDCl}_3$ )  $\delta$  168.3, 163.6, 123.5–119.6 (m), 118.6, 117.7–113.9 (m), 23.8. All the characterization data are consistent with previous report.<sup>9</sup>

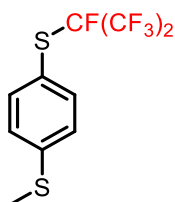

**Methyl(4-((perfluoropropan-2-yl)thio)phenyl)sulfane (3w)** The product (82.8 mg, 51% yield) was purified with silica gel chromatography (Petroleum ether) as a colorless liquid.  $^1\text{H NMR}$  (400 MHz,  $\text{CDCl}_3$ )  $\delta$  7.51 (d,  $J = 8.4$  Hz, 2H), 7.21 (d,  $J = 8.5$  Hz, 2H), 2.48 (s, 3H).  $^{19}\text{F NMR}$  (376 MHz,  $\text{CDCl}_3$ )  $\delta$  -73.86 (d,  $J = 11.4$  Hz, 6F), -157.58 (hept,  $J = 11.2$  Hz, 1F).  $^{13}\text{C NMR}$  (101 MHz,  $\text{CDCl}_3$ )  $\delta$  143.9, 137.7, 126.1, 120.3 (qd,  $J = 287.8$  Hz, 30.2 Hz), 118.1, 99.6–96.5 (m), 14.9. **MS** (EI,  $m/z$ ): 324 ( $\text{M}^+$ ). **HRMS** (EI): Calcd for  $\text{C}_{11}\text{H}_7\text{F}_7\text{S}_2^+$  ( $\text{M}^+$ ) 323.9872, found 323.9871. **IR** (film): 2925, 2848, 1578, 1478, 1284, 1223, 1187, 1105, 1074, 1013, 960, 941, 813, 754, 716, 509

cm<sup>-1</sup>.

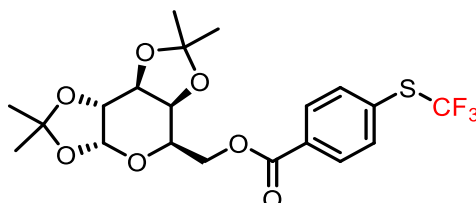

**((3aR,5R,5aS,8aS,8bR)-2,2,7,7-Tetramethyltetrahydro-5H-bis([1,3]dioxolo)[4,5-b:4',5'-d]pyran-5-yl)methyl 4-((trifluoromethyl)thio)benzoate (3x)** The product (210.8 mg, 91% yield) was purified with silica gel chromatography (PE:EA = 10:1) as a colorless liquid. <sup>1</sup>H NMR (400 MHz, CDCl<sub>3</sub>) δ 8.05 (d, *J* = 8.4 Hz, 2H), 7.68 (d, *J* = 8.4 Hz, 2H), 5.54 (d, *J* = 4.9 Hz, 1H), 4.63 (dd, *J* = 7.9, 2.5 Hz, 1H), 4.51 (dd, *J* = 11.6, 4.6 Hz, 1H), 4.42 (dd, *J* = 11.6, 7.7 Hz, 1H), 4.33 (dd, *J* = 5.0, 2.5 Hz, 1H), 4.29 (dd, *J* = 7.9, 1.9 Hz, 1H), 4.15 (ddd, *J* = 7.0, 4.7, 1.9 Hz, 1H), 1.48 (s, 3H), 1.44 (s, 3H), 1.32 (s, 3H), 1.30 (s, 3H). <sup>19</sup>F NMR (376 MHz, CDCl<sub>3</sub>) δ -41.88 (s, 3F). <sup>13</sup>C NMR (101 MHz, CDCl<sub>3</sub>) δ 165.4, 135.5, 132.1, 130.5, 129.9 (q, *J* = 2.3 Hz), 129.3 (q, *J* = 309.5 Hz), 109.7, 108.8, 96.3, 71.1, 70.7, 70.5, 66.0, 64.4, 25.99, 25.95, 24.9, 24.5. MS (ESI, m/z): 465.0 (M+H<sup>+</sup>). HRMS (ESI): Calcd for C<sub>20</sub>H<sub>24</sub>F<sub>3</sub>O<sub>7</sub>S<sup>+</sup> (M+H<sup>+</sup>) 465.1189, found 465.1184. IR (film): 2989, 2936, 1727, 1399, 1383, 1273, 1212, 1165, 1116, 1071, 1008, 919, 898, 857, 764, 693, 511 cm<sup>-1</sup>.

## 5. Preparation of Trifluoromethyl-heteroaryl Sulfones



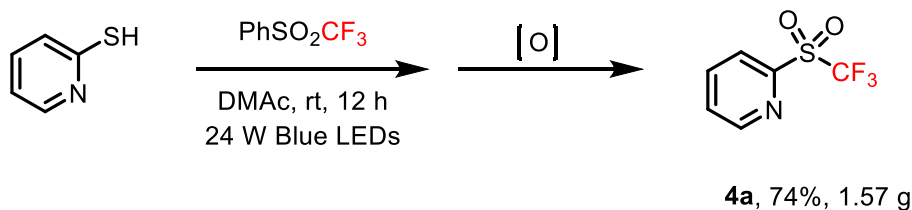

## Typical procedures

Under dry N<sub>2</sub> atmosphere, to sealed tube were added **pyridine-2-thiol** (10.0 mmol, 1.11 g, 1.0 equiv), **2a** (11.0 mmol, 2.31 g, 1.1 equiv), Cs<sub>2</sub>CO<sub>3</sub> (20.0 mmol, 6.5 g, 2.0 equiv), dry DMAc (50.0 mL). The mixture was irradiated by a 24 W blue LED for 12 h. After the completion of the reaction, the mixture was quenched by saturated NH<sub>4</sub>Cl solution, then the mixture was extracted with Et<sub>2</sub>O for 3 times. The organic phase was combined and dried over anhydrous MgSO<sub>4</sub>. The solvent was removed under reduced pressure to give a brown liquid. To a 100 mL, three-neck flask were added the above obtained brown liquid, and NaIO<sub>4</sub> (25.0 mmol, 5.33 g, 2.5 equiv), RuCl<sub>3</sub> · xH<sub>2</sub>O (1.0 mg), CCl<sub>4</sub> (10.0 mL), CH<sub>3</sub>CN (10.0 mL) and H<sub>2</sub>O (20.0 mL) were added, The mixture was stirred at room temperature overnight. After the completion of the reaction, the mixture was extracted with dichloromethane (DCM) for 3 times. Then the organic phase was combined and dried over anhydrous MgSO<sub>4</sub>. The solvent was removed under reduced pressure and the residue was purified by column chromatography on silica gel by using a 10:1 mixture of PE/ethyl acetate (EA) as an eluent to provide **4a** as white solid (1.57 g, 74%).

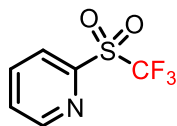

**2-((Trifluoromethyl)sulfonyl)pyridine (4a)** The product ( 1.57 g, 74% yield) was purified with silica gel chromatography (PE:EA = 10:1) as white solid. <sup>1</sup>H NMR (400 MHz, CDCl<sub>3</sub>) δ 8.85 (d, *J* = 4.8 Hz, 1H), 8.29 – 8.16 (m, 1H), 8.08 (td, *J* = 7.8, 1.7 Hz, 1H), 7.73 (ddd, *J* = 7.8, 4.7, 1.3 Hz, 1H). <sup>19</sup>F NMR (376 MHz, CDCl<sub>3</sub>) δ -75.83 (s,

3F).  $^{13}\text{C}$  NMR (101 MHz,  $\text{CDCl}_3$ )  $\delta$  151.4, 151.1, 138.8, 129.7, 126.3, 119.8 (q,  $J = 327.6$  Hz). All the characterization data are consistent with previous report.<sup>11</sup>

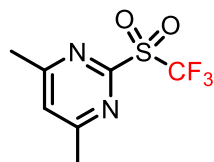

**4,6-Dimethyl-2-((trifluoromethyl)sulfonyl)pyrimidine (4b)** The product (1.96 g, 82% yield) was purified with silica gel chromatography (PE:EA = 3:1) as white solid. Mp: 38 – 39 °C.  $^1\text{H}$  NMR (400 MHz,  $\text{CDCl}_3$ )  $\delta$  7.35 (s, 1H), 2.63 (s, 6H).  $^{19}\text{F}$  NMR (376 MHz,  $\text{CDCl}_3$ )  $\delta$  – 73.69 (s, 3F).  $^{13}\text{C}$  NMR (101 MHz,  $\text{CDCl}_3$ )  $\delta$  170.2, 161.0, 124.7, 119.9 (q,  $J = 327.9$  Hz), 23.9. MS (DART, m/z): 241.0 ( $\text{M}+\text{H}^+$ ). HRMS (DART): Calcd for  $\text{C}_7\text{H}_8\text{F}_3\text{N}_2\text{O}_2\text{S}^+$  ( $\text{M}+\text{H}^+$ ) 241.0253, found 241.0252. IR (film): 2936, 1597, 1510, 1436, 1371, 1205, 1114, 633, 608, 563, 521  $\text{cm}^{-1}$ .

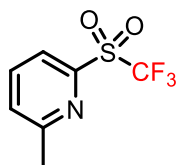

**2-Methyl-6-((trifluoromethyl)sulfonyl)pyridine (4c)** The product (1.34 g, 74% yield) was purified with silica gel chromatography (PE:EA = 10:1) as white solid. Mp: 70 – 71 °C.  $^1\text{H}$  NMR (400 MHz,  $\text{CDCl}_3$ )  $\delta$  8.00 (d,  $J = 7.7$  Hz, 1H), 7.93 (t,  $J = 7.8$  Hz, 1H), 7.56 (d,  $J = 7.8$  Hz, 1H), 2.67 (s, 3H).  $^{19}\text{F}$  NMR (376 MHz,  $\text{CDCl}_3$ )  $\delta$  –75.75 (s, 3F).  $^{13}\text{C}$  NMR (101 MHz,  $\text{CDCl}_3$ )  $\delta$  161.6, 150.4 (q,  $J = 2.0$  Hz), 138.5, 129.1, 123.4, 119.8 (q,  $J = 327.8$  Hz), 24.2. MS (FI, m/z): 225 ( $\text{M}^+$ ). HRMS (DART): Calcd for  $\text{C}_7\text{H}_8\text{F}_3\text{NO}_2\text{S}^+$  ( $\text{M}^+$ ) 225.0066, found 225.0072. IR (film): 3114, 3061, 2919, 1593, 1456, 1367, 1254, 1215, 1173, 1147, 1102, 985, 911, 867, 975, 762, 618, 589, 546, 524, 511  $\text{cm}^{-1}$ .

## 6. Cyclic Voltammetry Study

The cyclic voltammetry measurements were performed on an EG & G-Princeton Applied Research CHI660E A18407 electrochemical workstation, using a standard three-electrode setup with two platinum wire electrode (a working electrode and a counter electrode) and a Ag/AgCl (3 M KCl) system in anhydrous CH<sub>3</sub>CN as the reference electrode. All solutions of the compounds under the study were in the supporting electrolyte *n*-Bu<sub>4</sub>NPF<sub>6</sub> (0.2 M) with the voltage scan rate of 0.05 V s<sup>-1</sup>. Solutions (5 mL) were thoroughly bubbled with dry nitrogen for 15 min to remove oxygen before any experiment and kept under positive pressure of nitrogen. Under these experimental conditions, the [FeCp<sub>2</sub>]/[FeCp<sub>2</sub>]<sup>+</sup> couple was located at  $E_{1/2} = +0.42$  V in CH<sub>3</sub>CN. The first reduction potentials of fluoroalkyl sulfones: cathodic peak potential *vs.* SCE (the saturated calomel electrode).  $E$  (V *vs.* SCE) =  $E$  (V *vs.* Ag/AgCl) - 0.03 V (potentials for reference electrode: Ag/AgCl (3 M KCl): +0.21 V, SCE: +0.24 V)

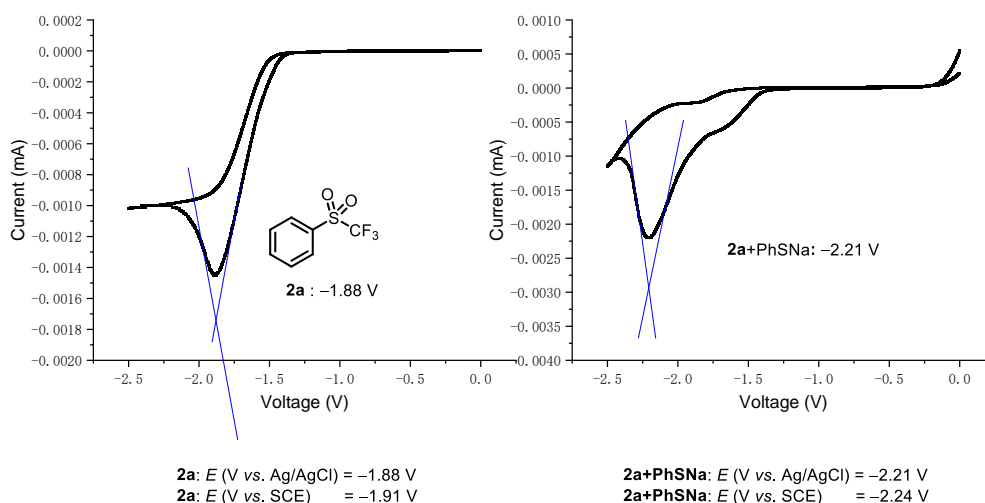

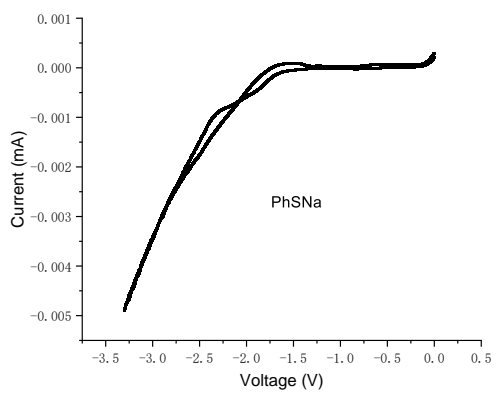

## 7. References

- (1) Y. Jiang, Y. Qin, S. Xie, X. Zhang, J. Dong, D. Ma, *Org. Lett.* **2009**, *11*, 22.
- (2) N. J. W. Straathof, B. J. P. Tegelbeckers, V. Hessel, X. Wang, T. Noel, *Chem. Sci.* **2014**, *5*, 4768.
- (3) M. Horvat, M. Jereb, J. Iskra, *Eur. J. Org. Chem.* **2018**, 3837.
- (4) X. Xiao, X. Wang, T. Yang, L. Lu, Q. Shen, *Angew. Chem. Int. Ed.* **2013**, *52*, 3457.
- (5) W. Zhong, X. Liu, *Tetrahedron Letters* **2014**, *55*, 4909.
- (6) J. Ma, W. Yi, G. Lu, C. Cai, *Catal. Sci. Technol.* **2016**, *6*, 417.
- (7) G. Danoun, B. Bayarmagnai, M. F. Gruenberg, L. Goossen, *Chem. Sci.* **2014**, *5*, 1312.
- (8) C. Chen, Y. Xie, L. Chu, R. Wang, X. Zhang, F. Qing, *Angew. Chem. Int. Ed.* **2012**, *51*, 2492.
- (9) Sipyagin, Enshov, *Chemistry of Heterocyclic Compounds*, **2003**, *39*, 1172.
- (10) J. Xiang, X. Xu, F. Qing, *Journal of Fluorine Chemistry* **2017**, *203*, 110.
- (11) J. Rong, L. Deng, P. Tan, C. Ni, Y. Gu, J. Hu, *Angew. Chem. Int. Ed.* **2016**, *55*, 2743.

## 8. $^1\text{H}$ , $^{19}\text{F}$ and $^{13}\text{C}$ NMR Spectra of Isolated Compounds

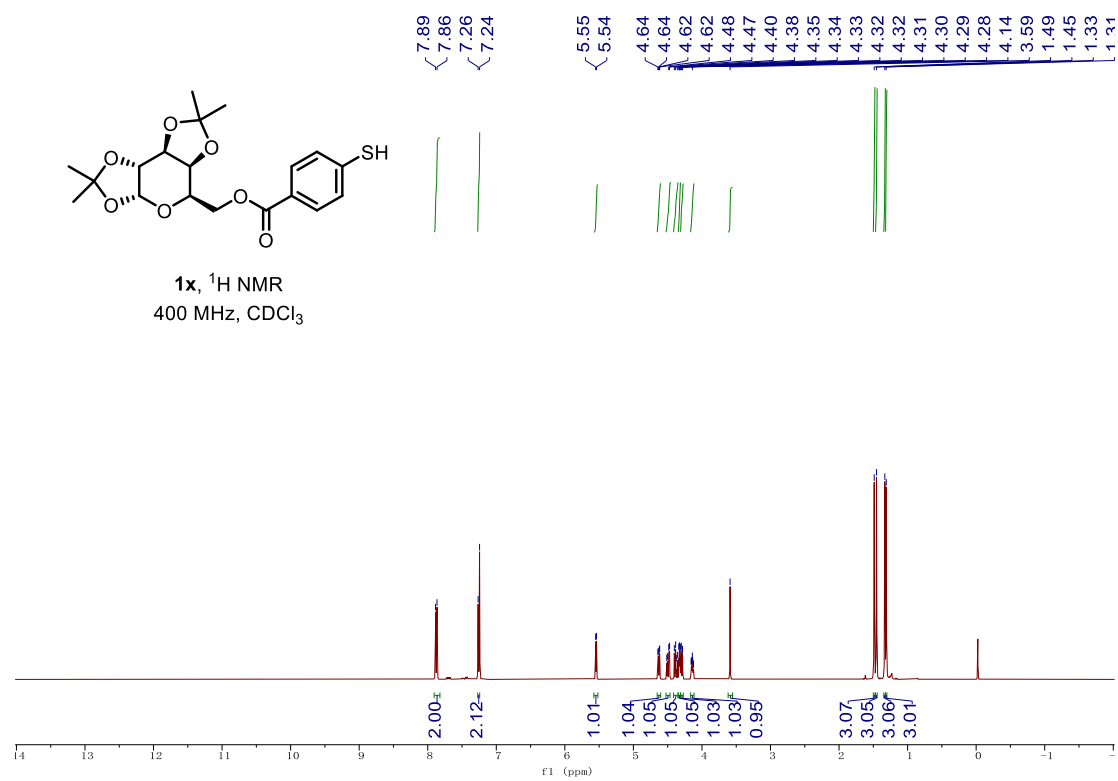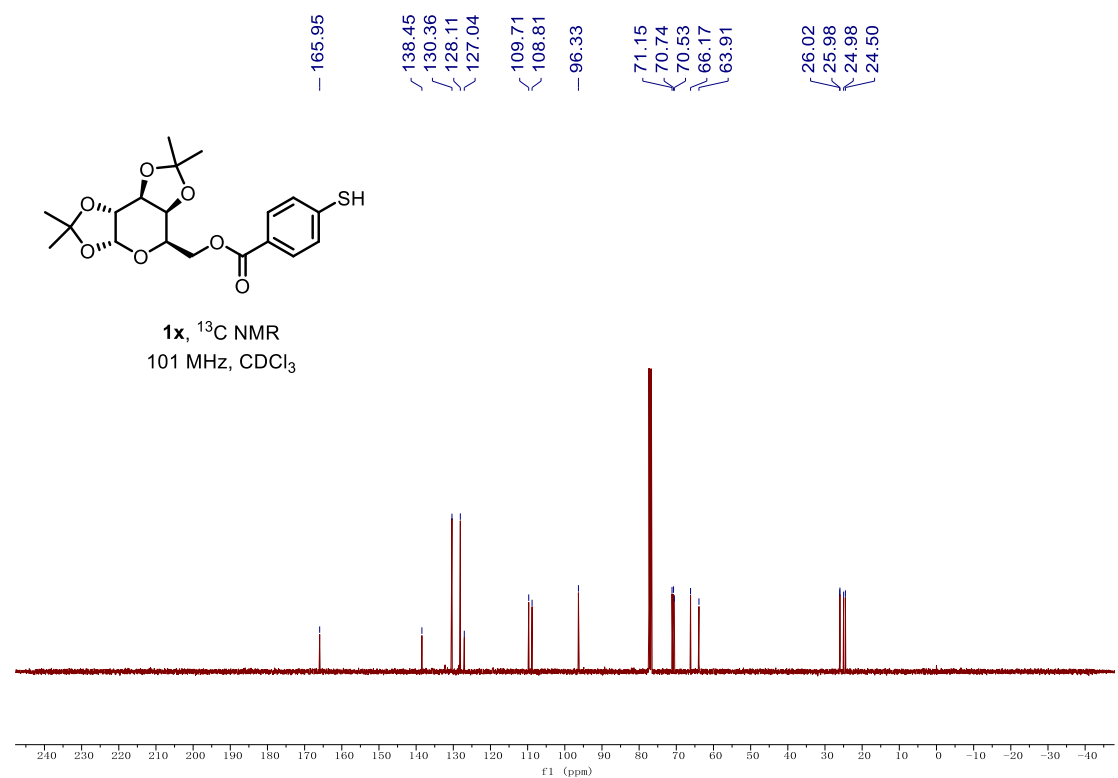

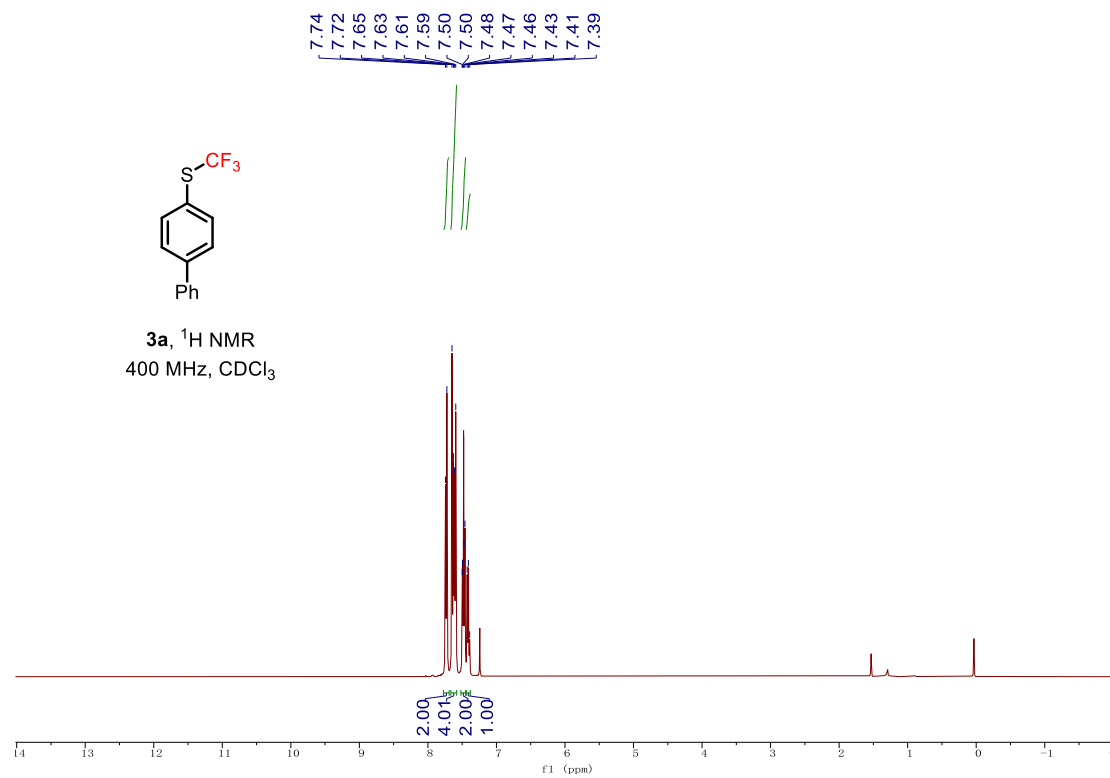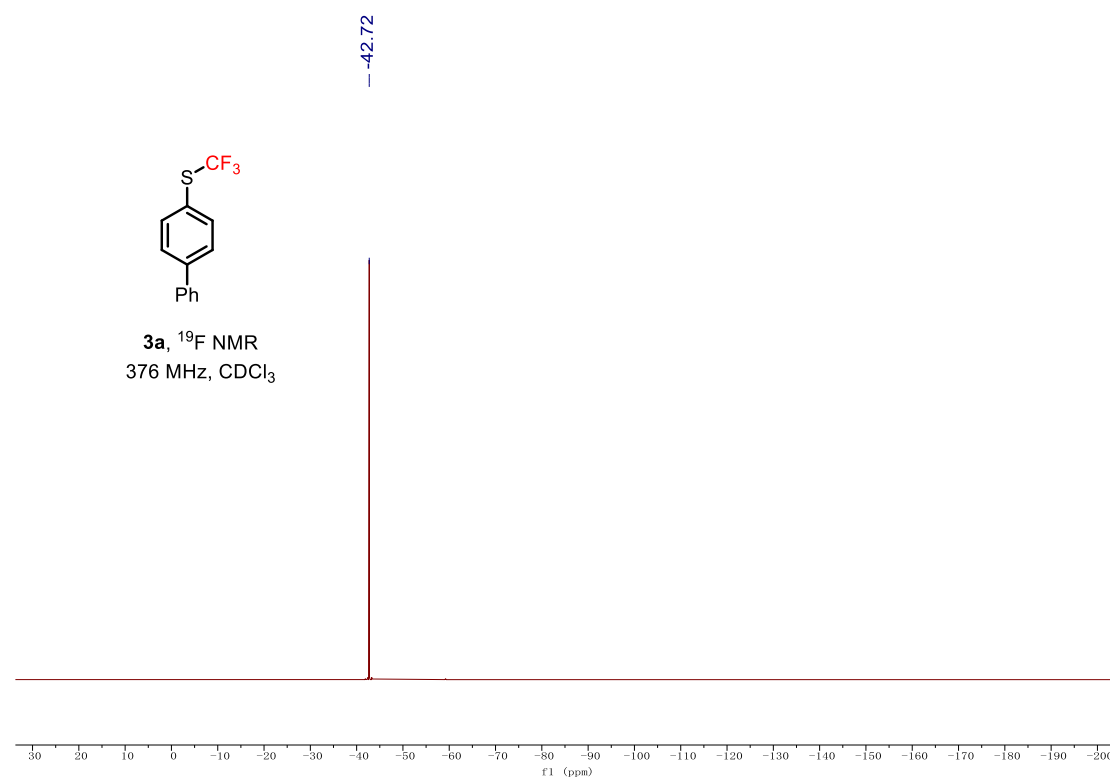

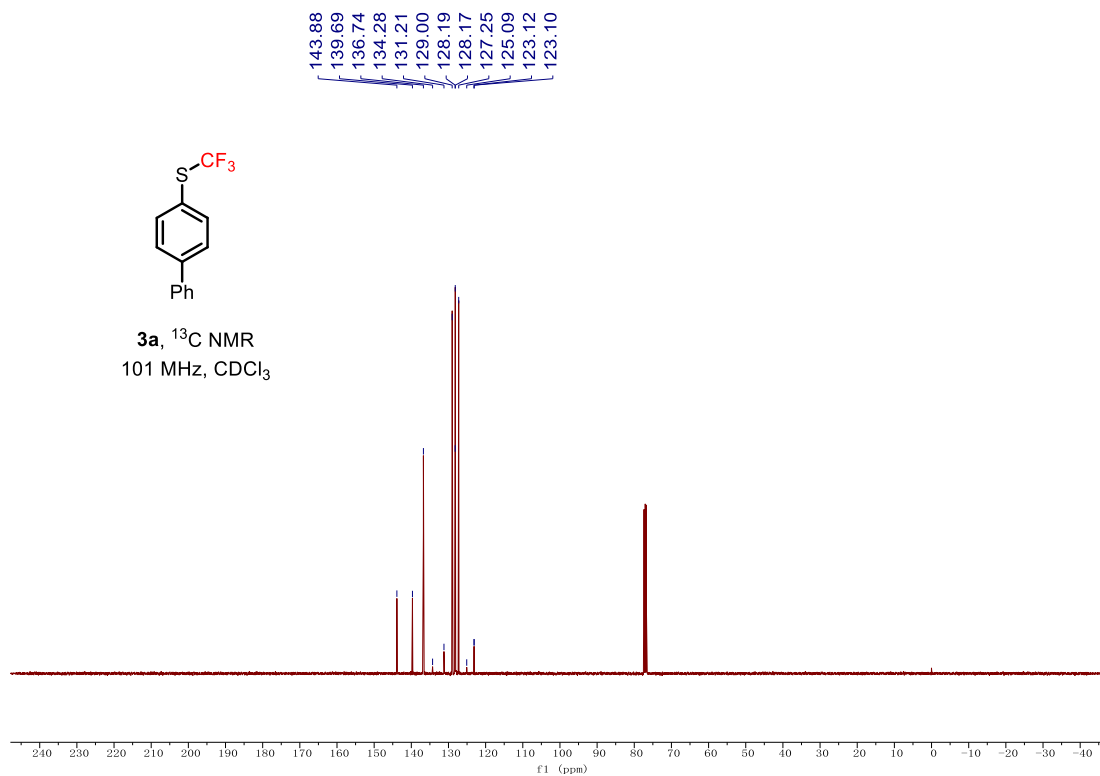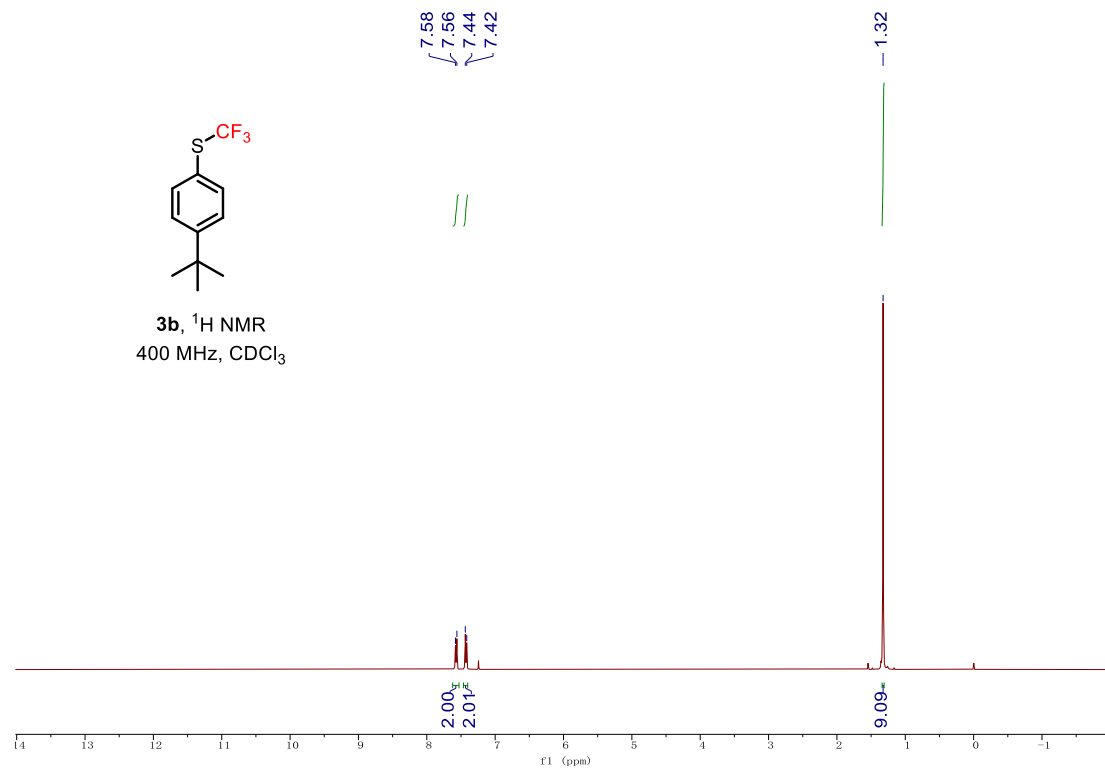



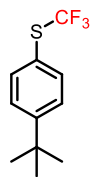

**3b**,  $^{19}\text{F}$  NMR  
376 MHz,  $\text{CDCl}_3$

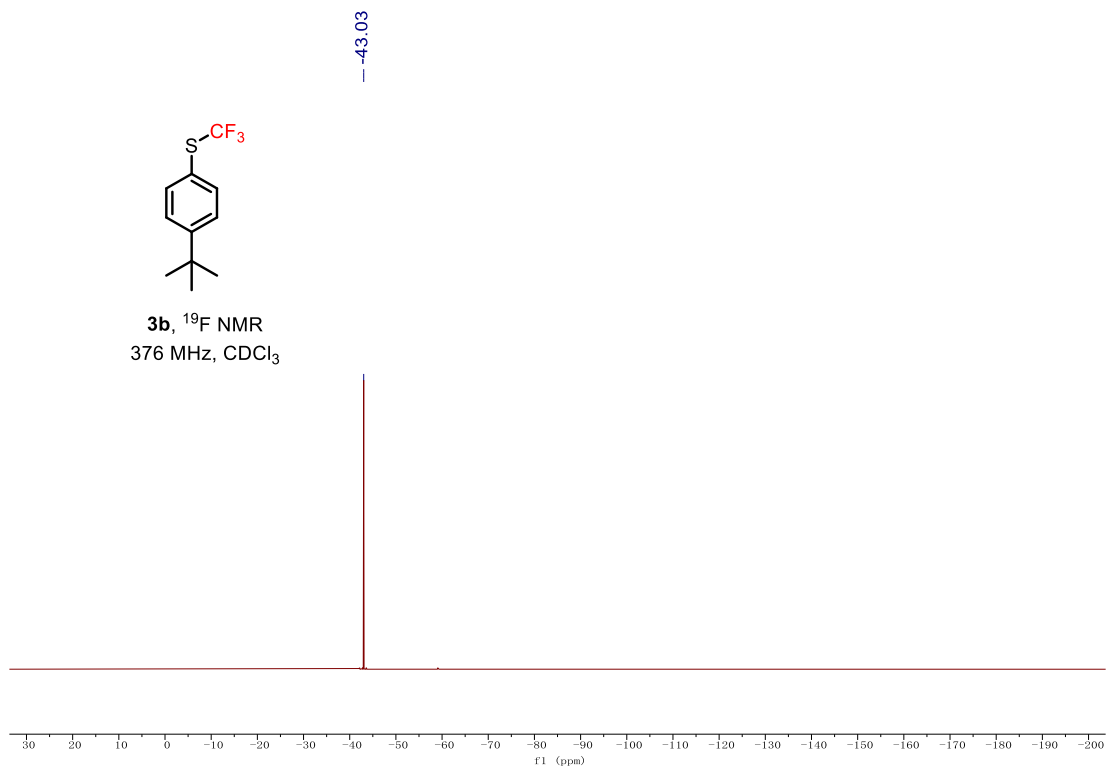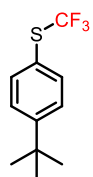

**3b**,  $^{13}\text{C}$  NMR  
101 MHz,  $\text{CDCl}_3$

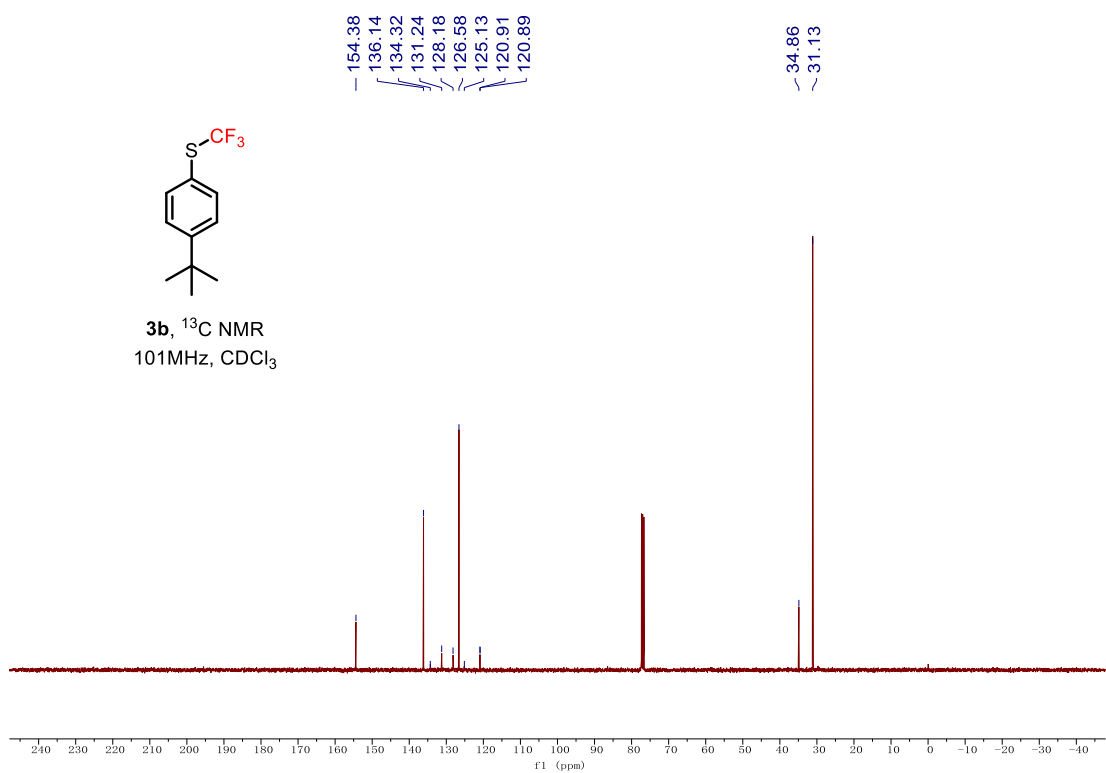

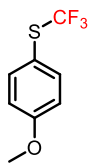

**3c**,  $^1\text{H}$  NMR  
400 MHz,  $\text{CDCl}_3$

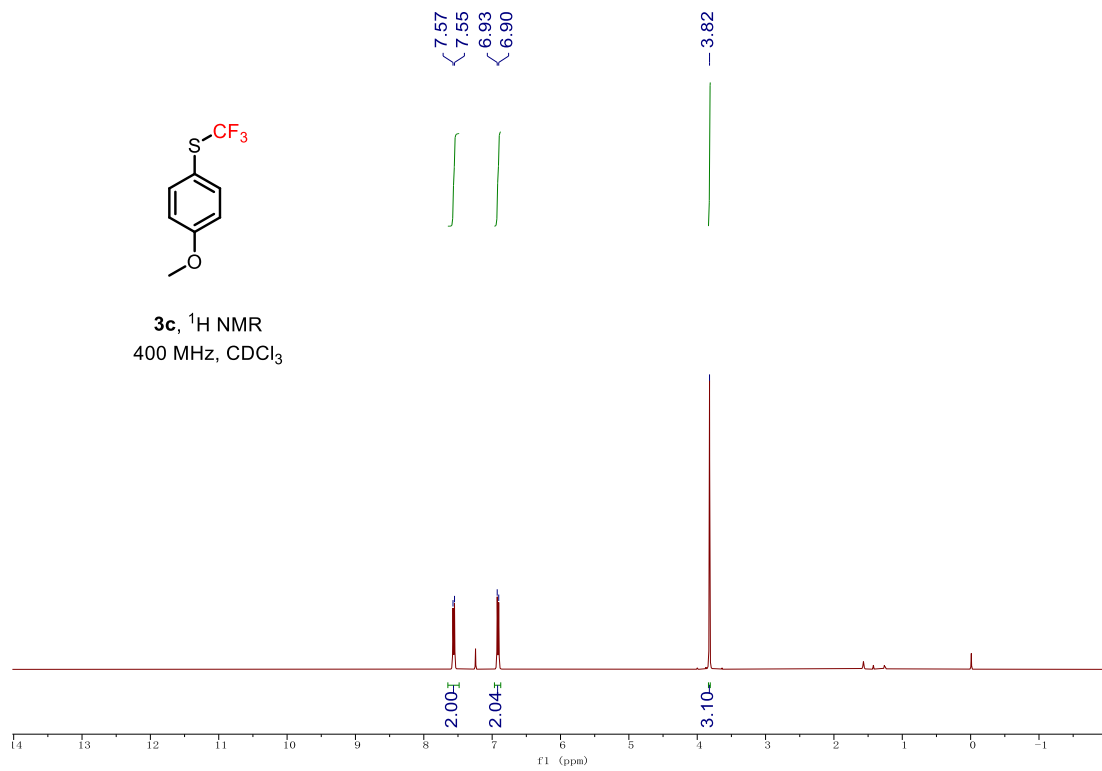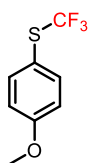

**3c**,  $^{19}\text{F}$  NMR  
376 MHz,  $\text{CDCl}_3$

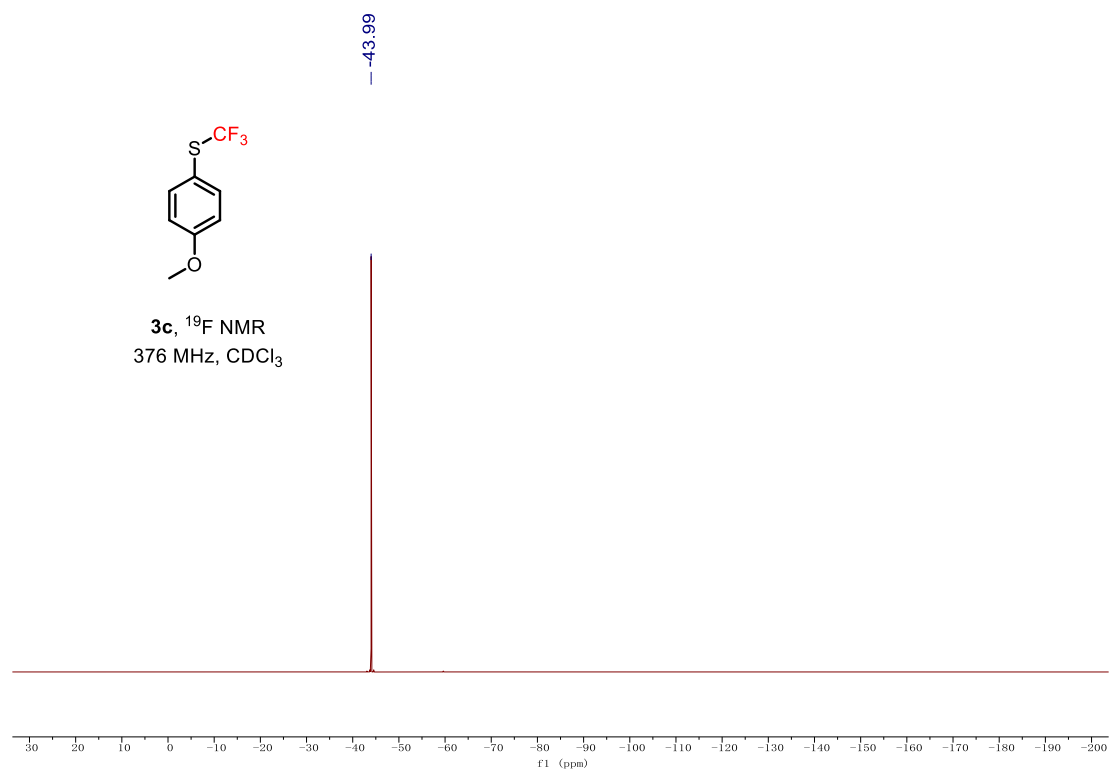

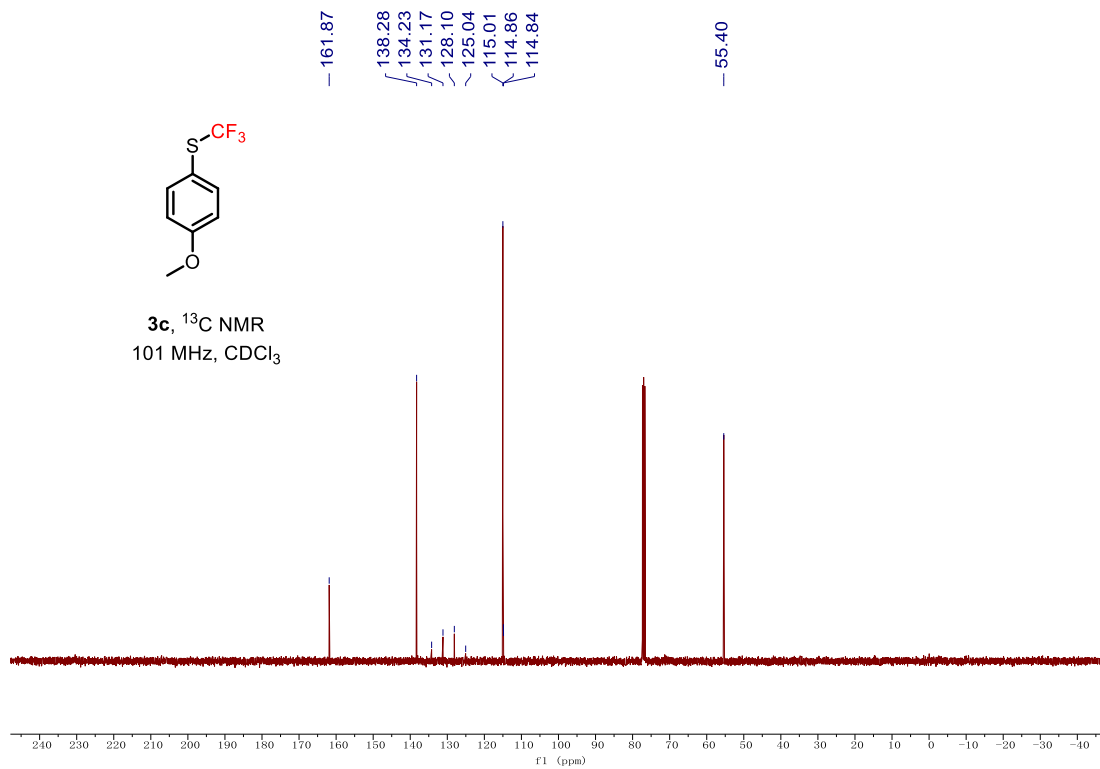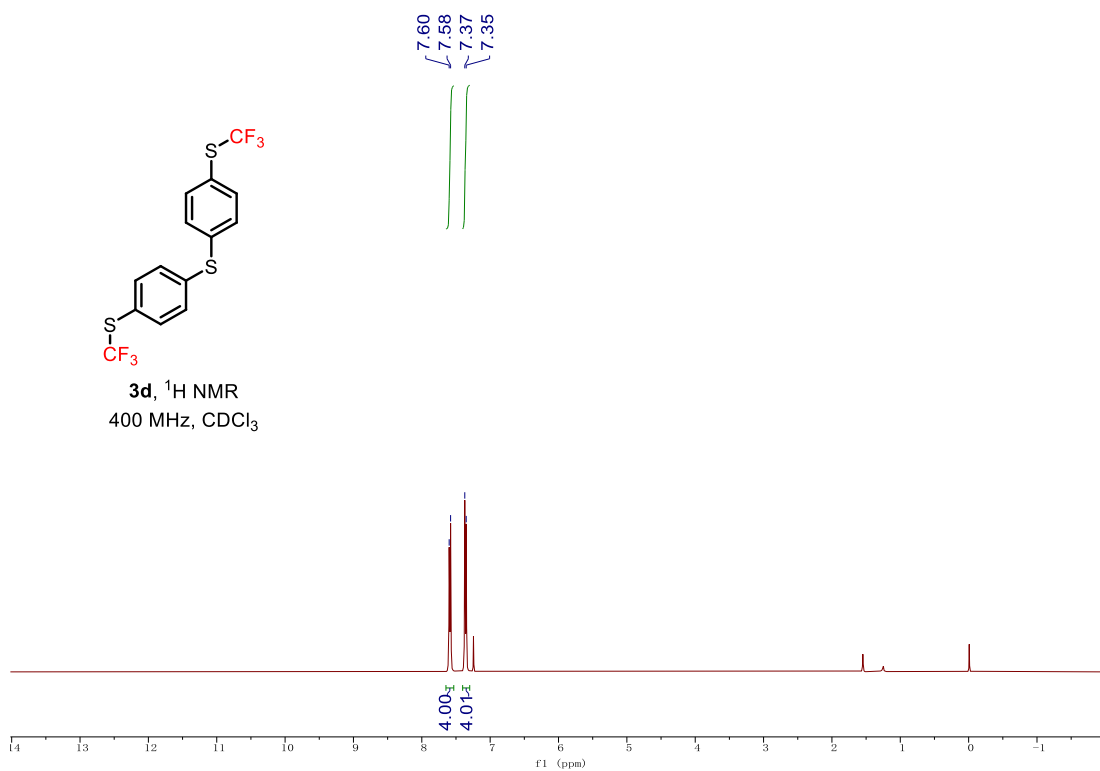

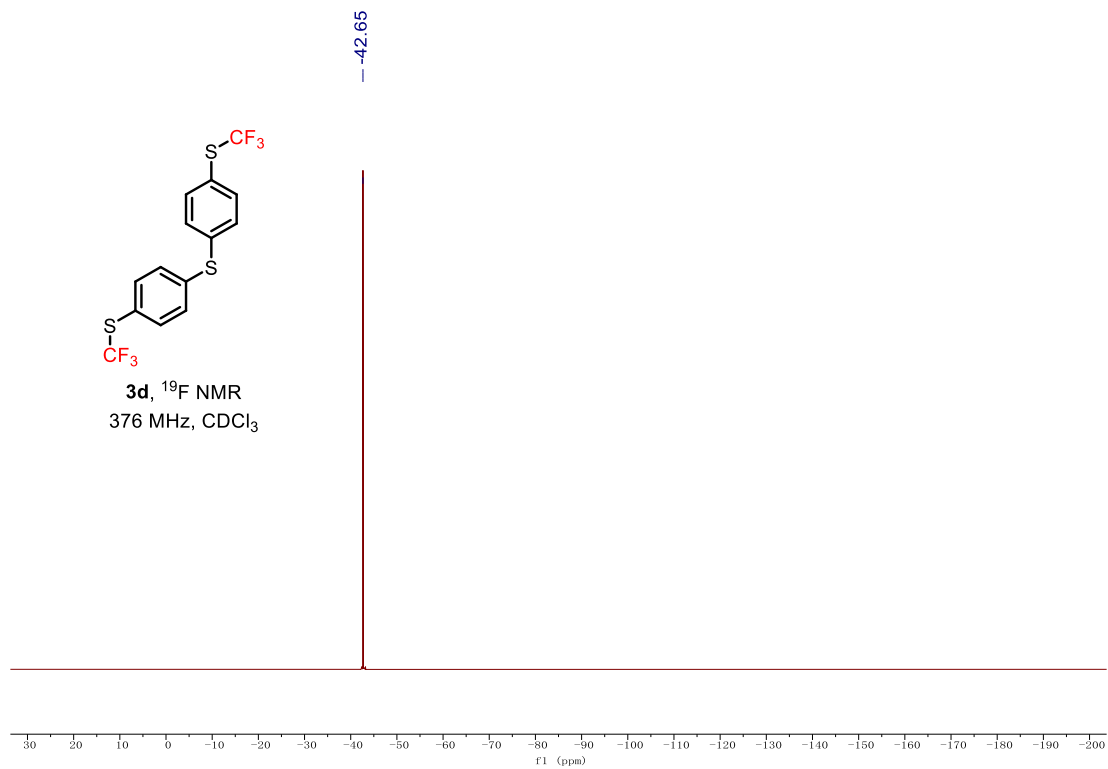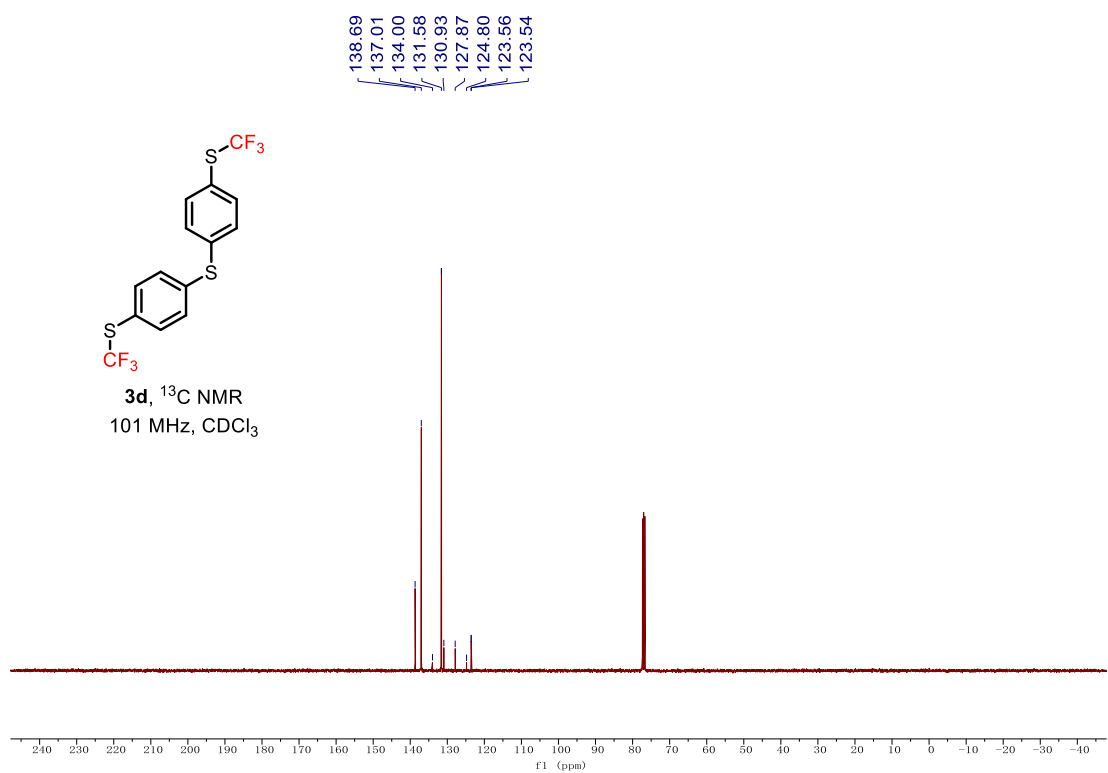

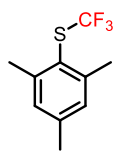

**3e**,  $^1\text{H}$  NMR  
400 MHz,  $\text{CDCl}_3$

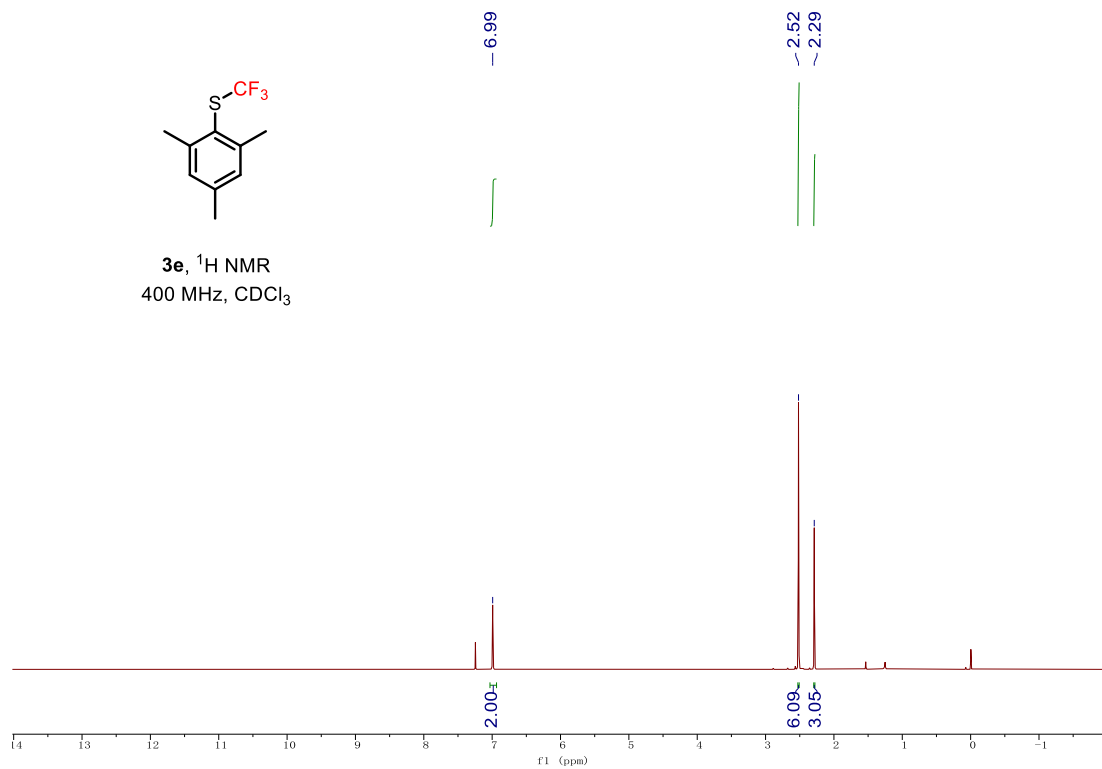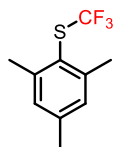

**3e**,  $^{19}\text{F}$  NMR  
376 MHz,  $\text{CDCl}_3$

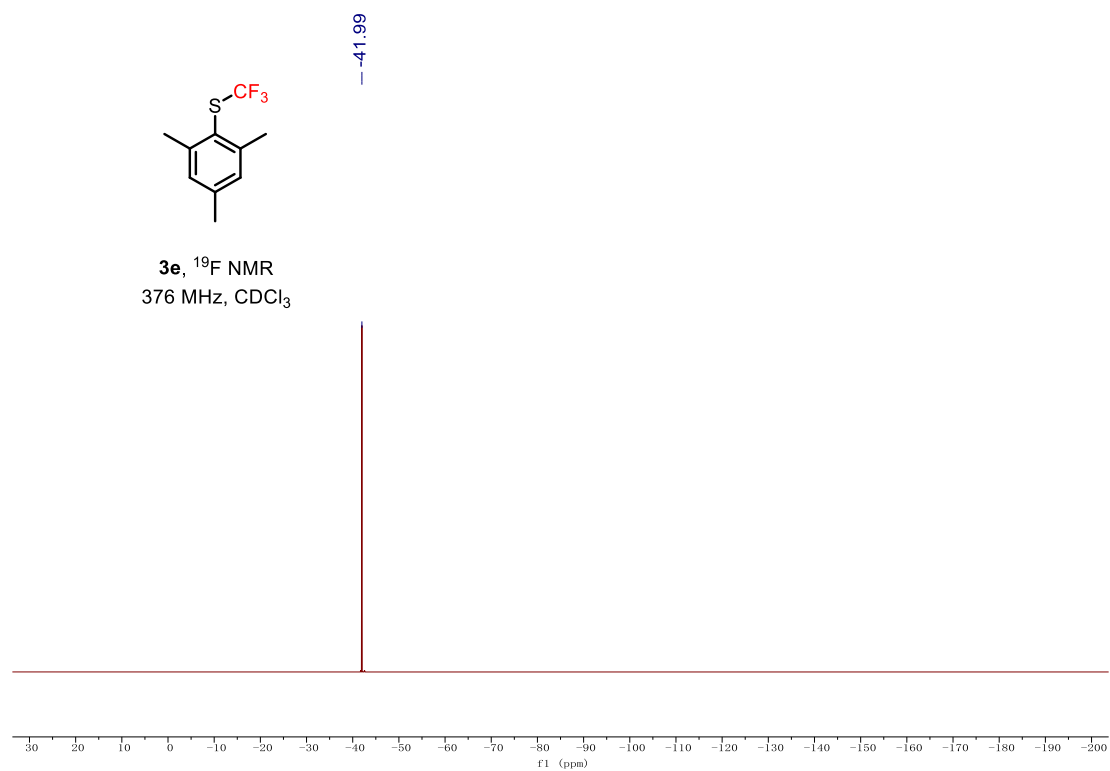

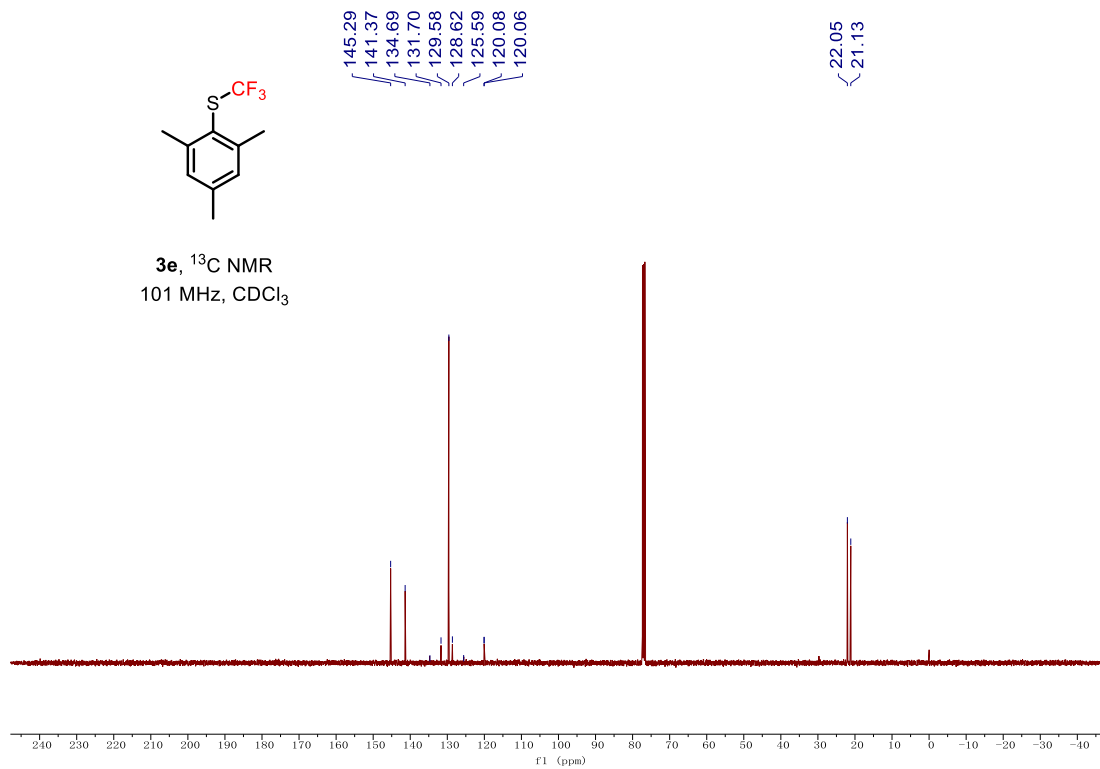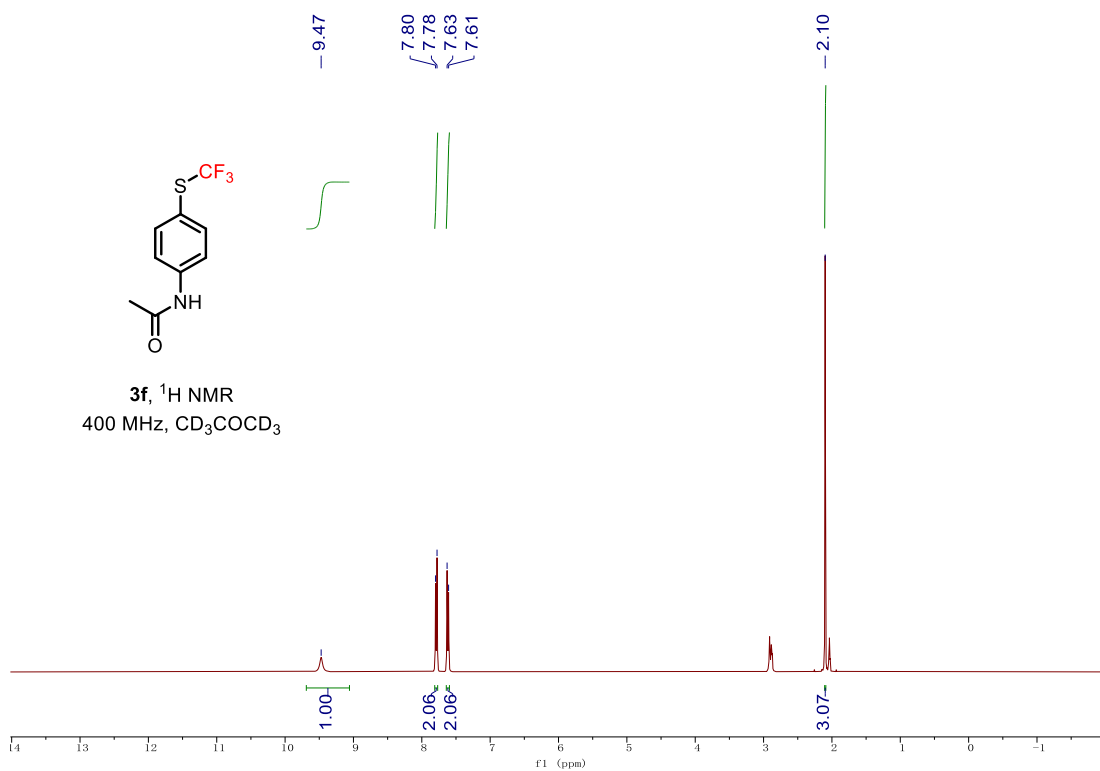

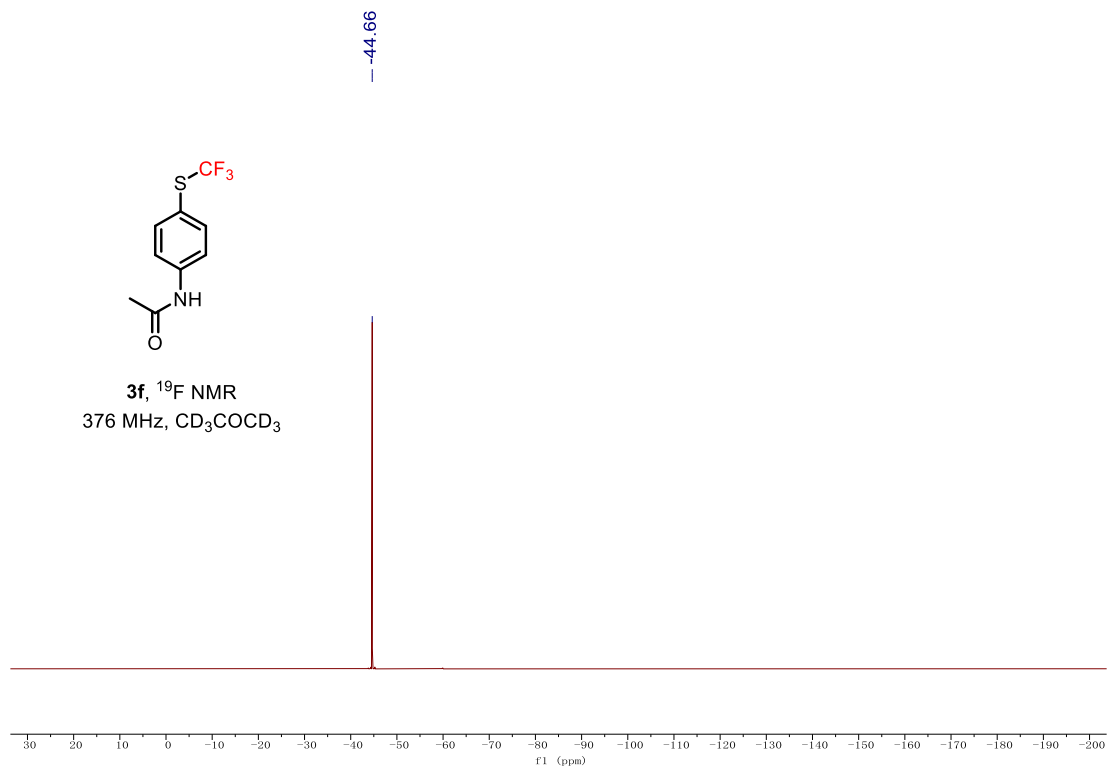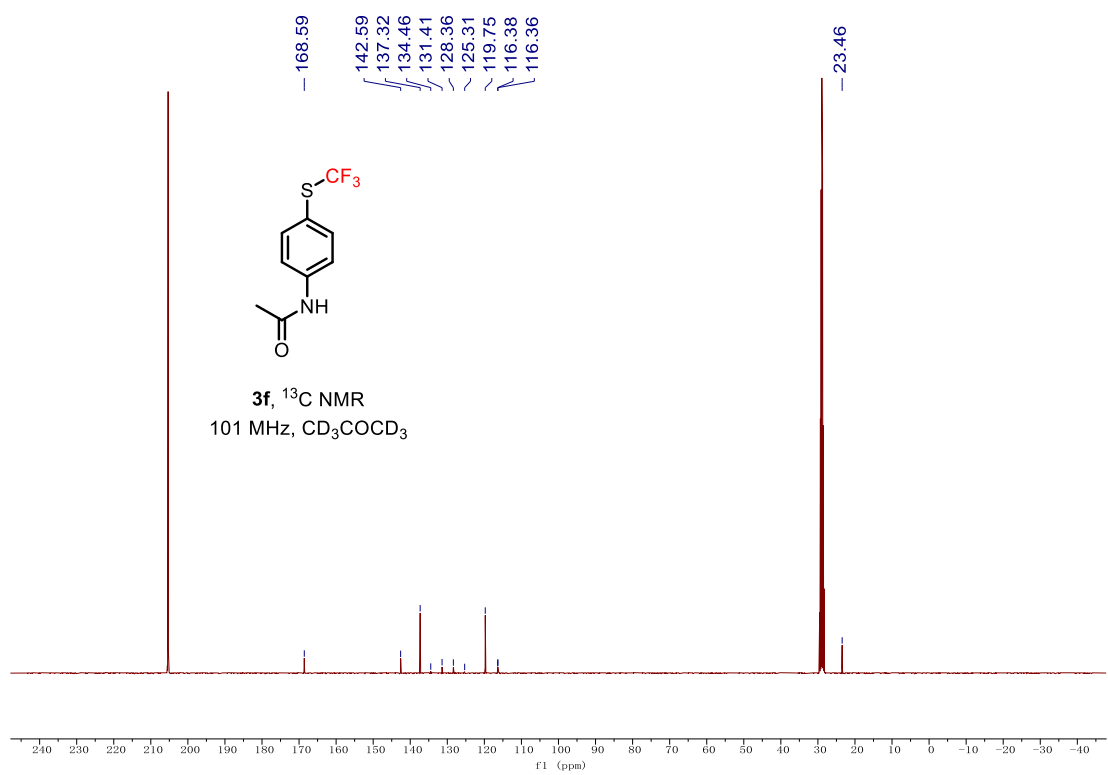

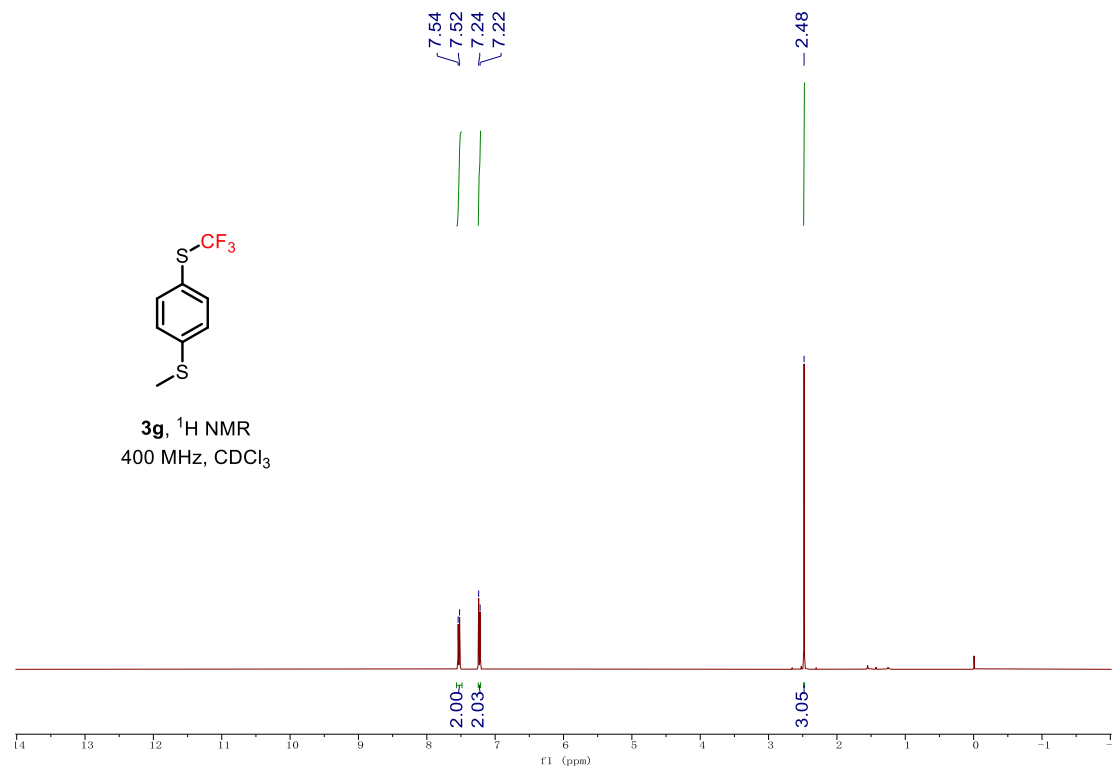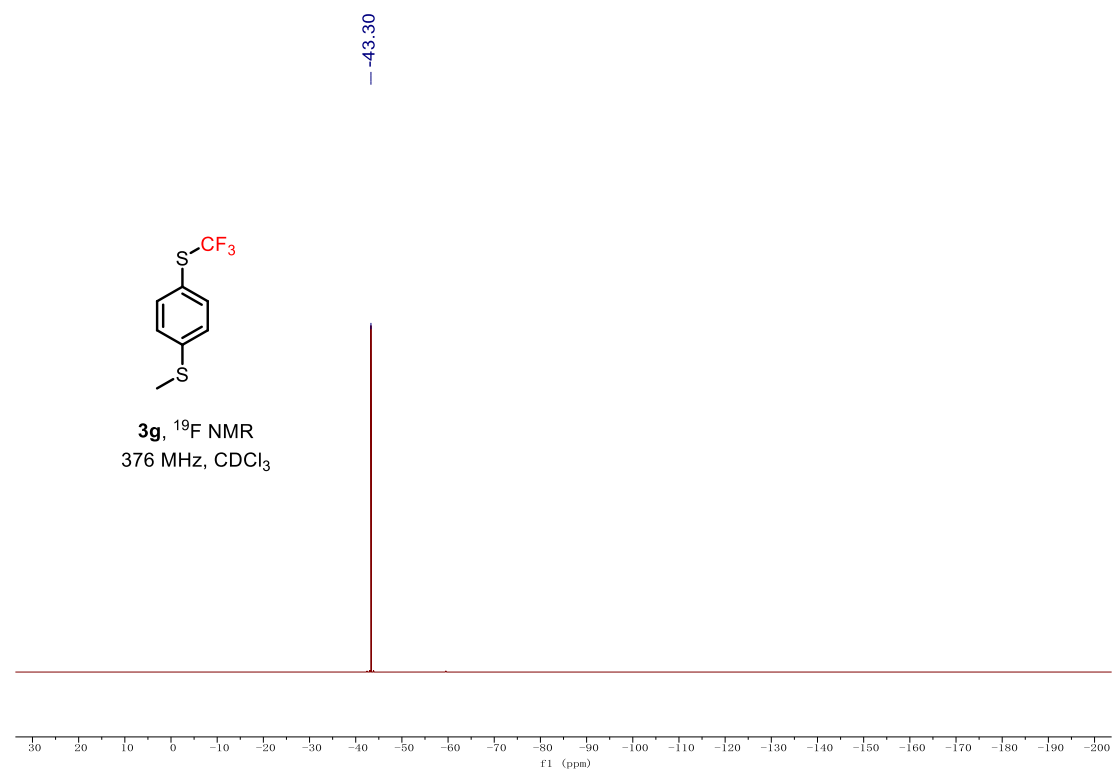



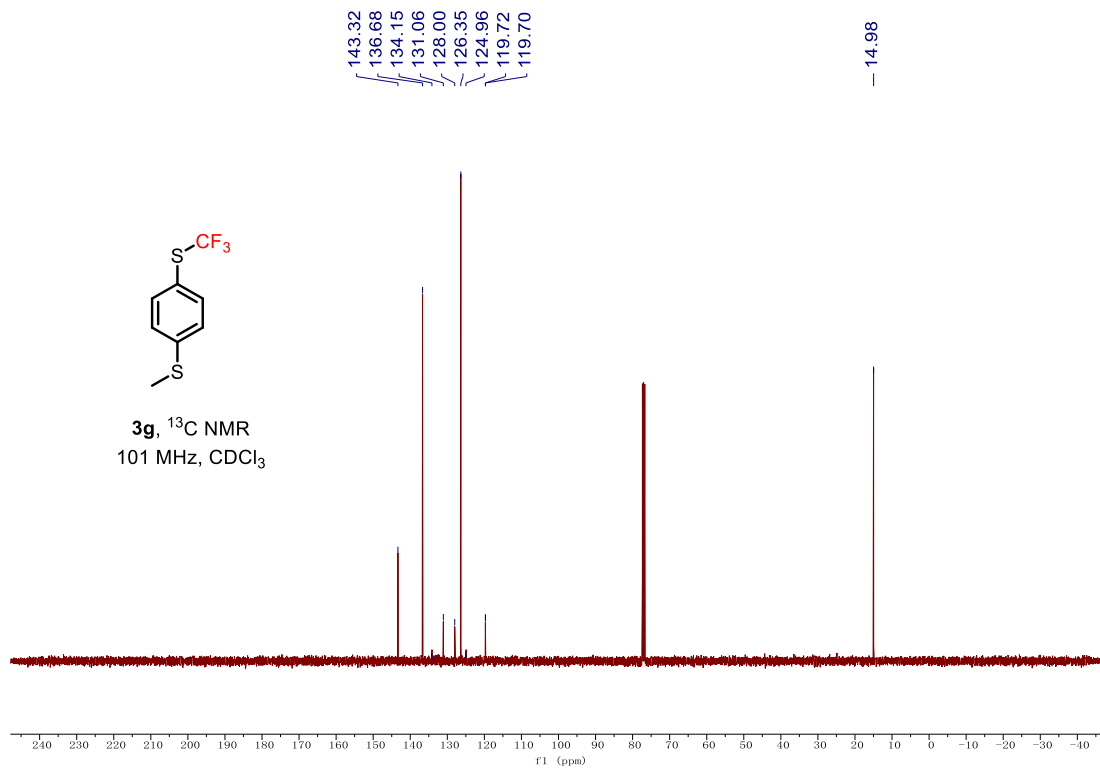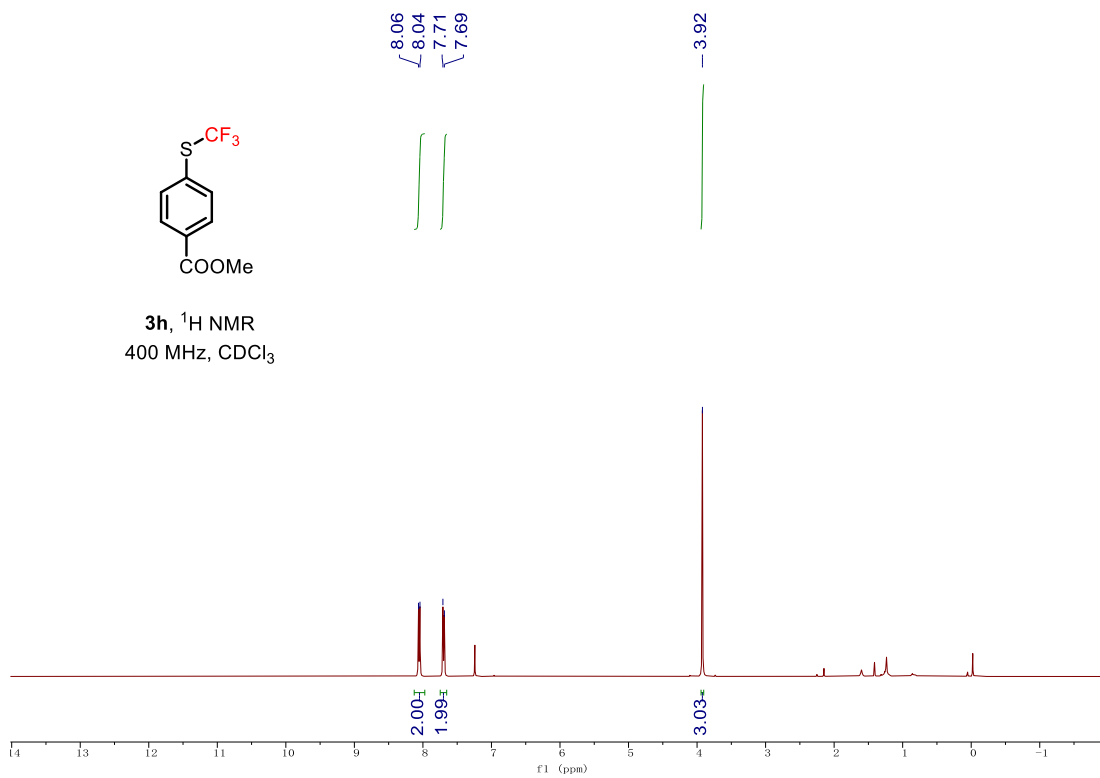

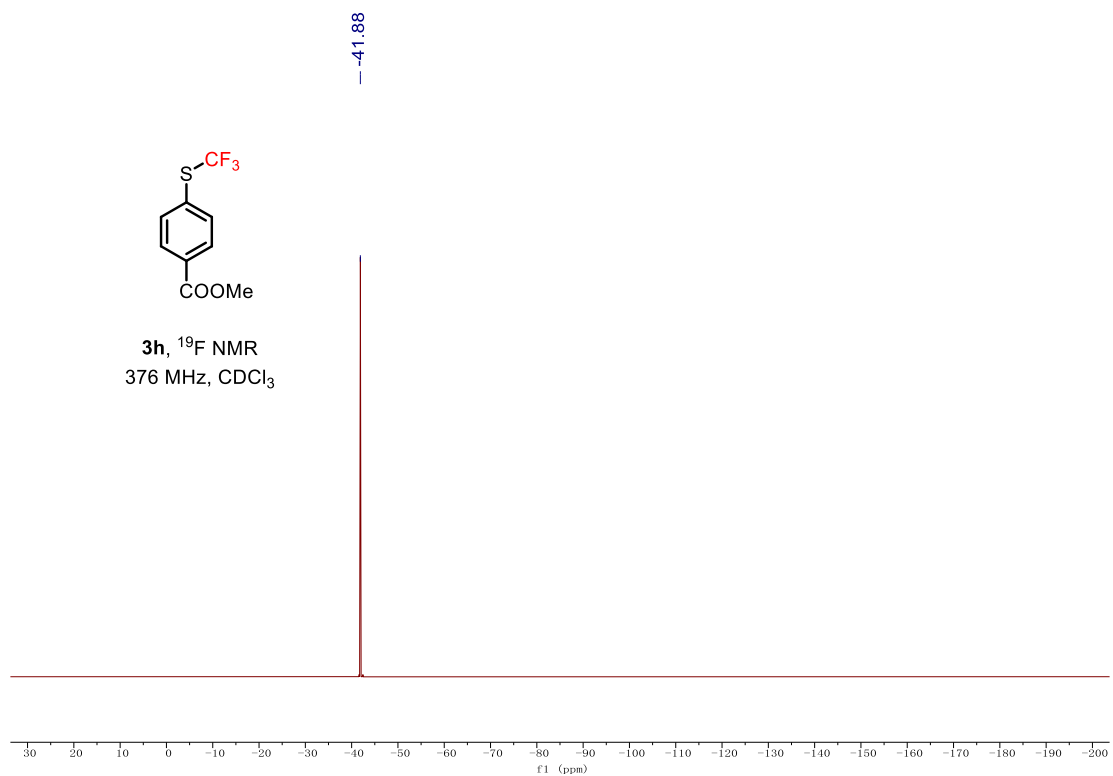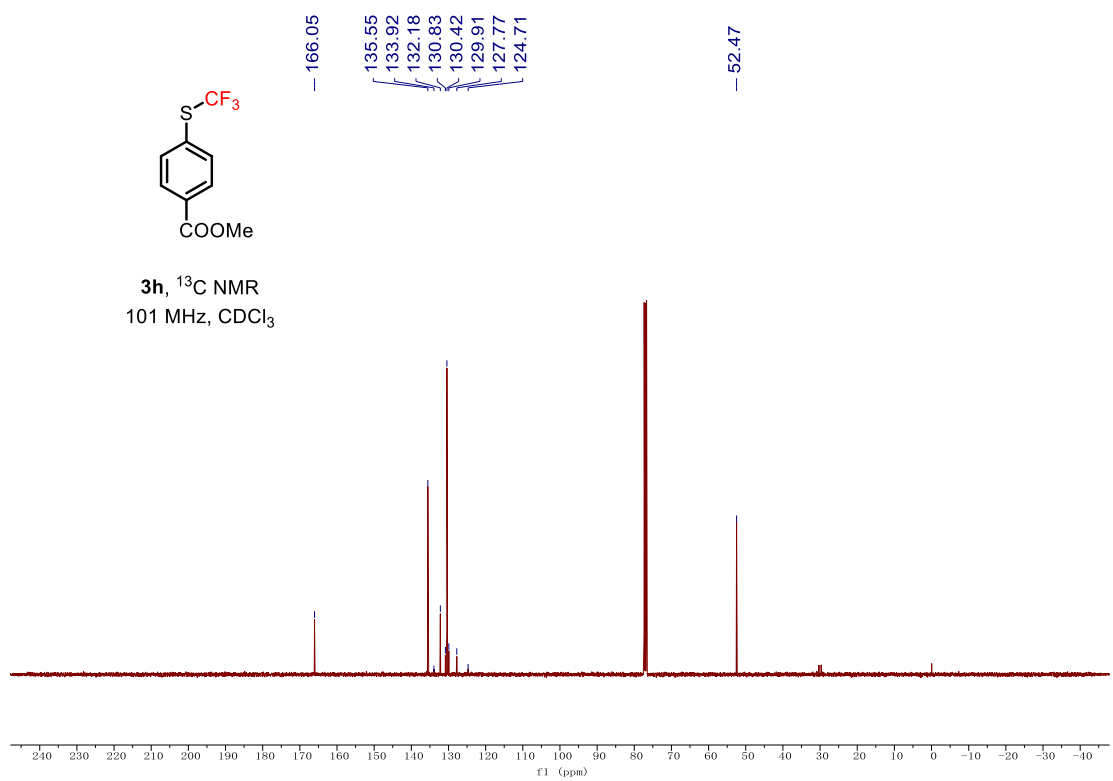

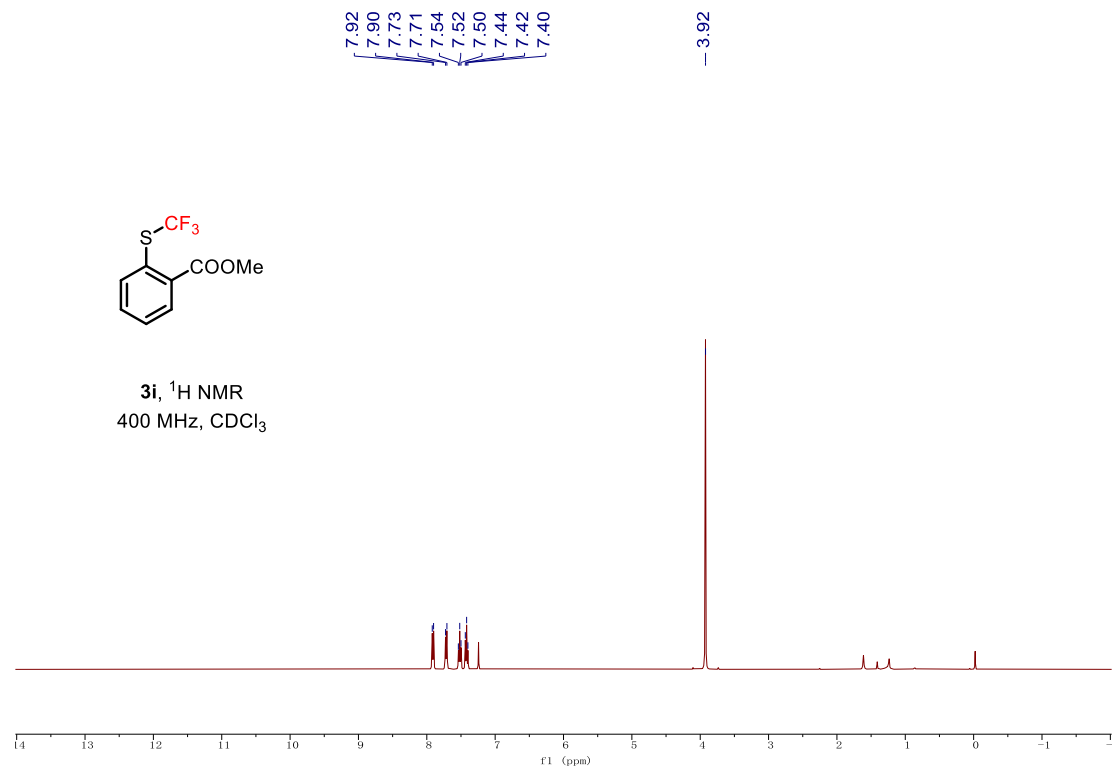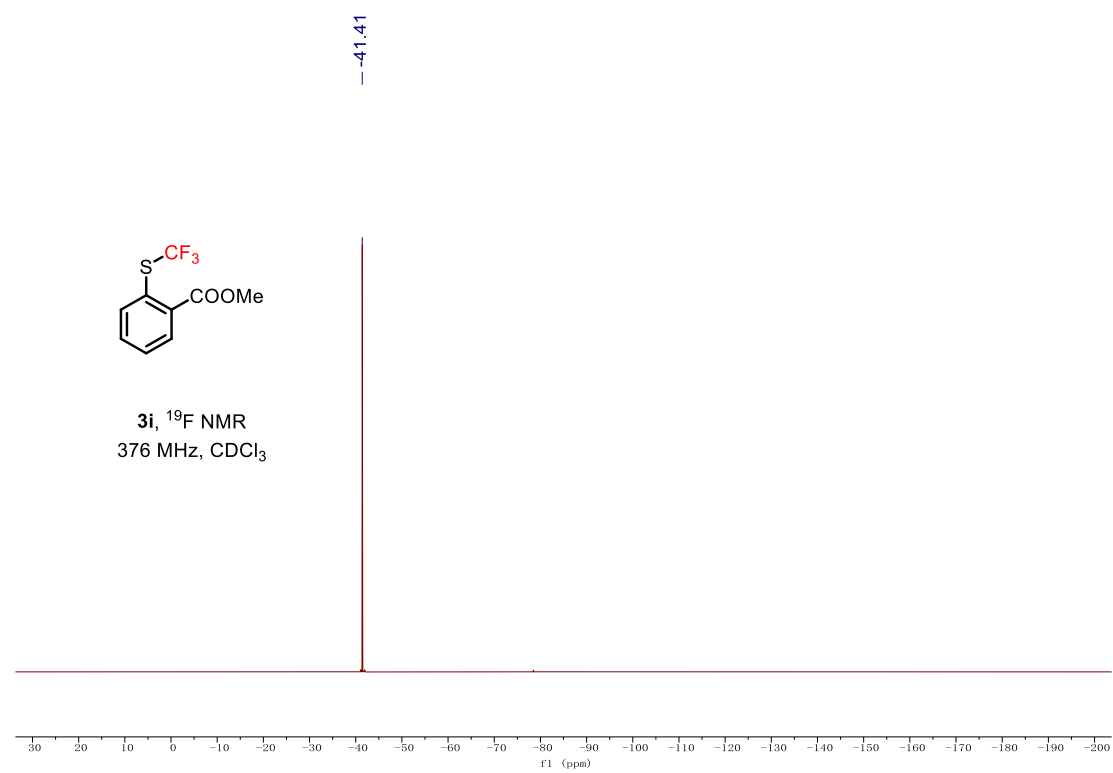

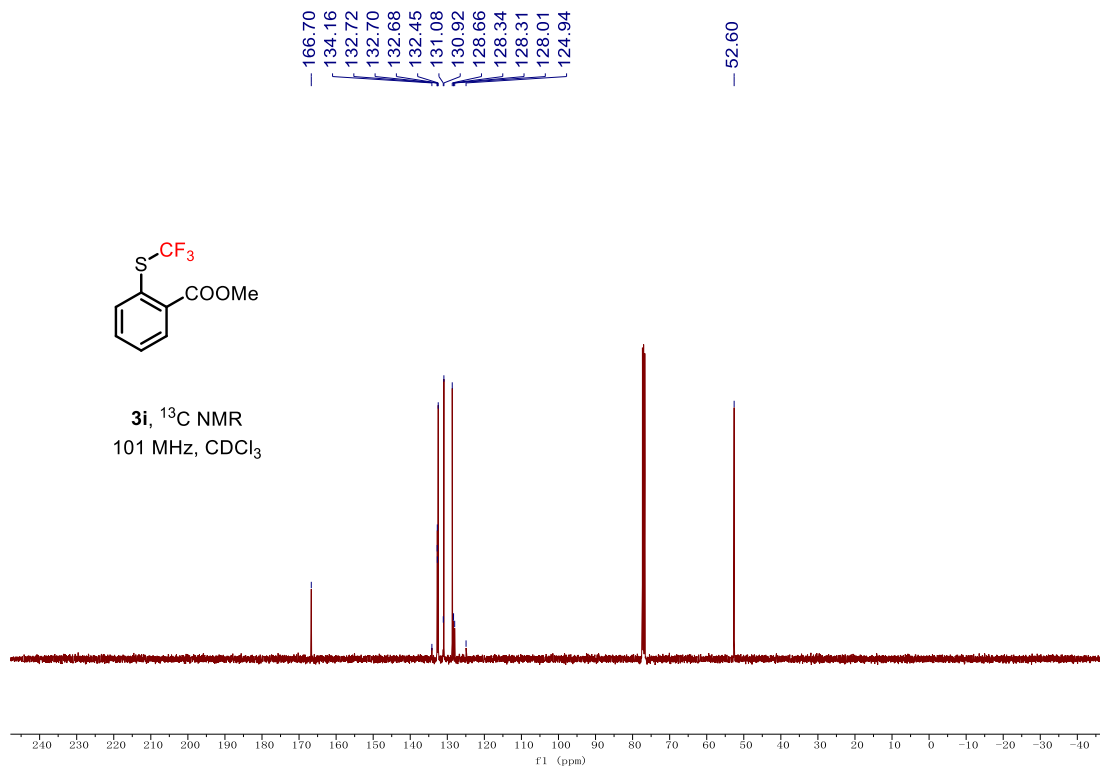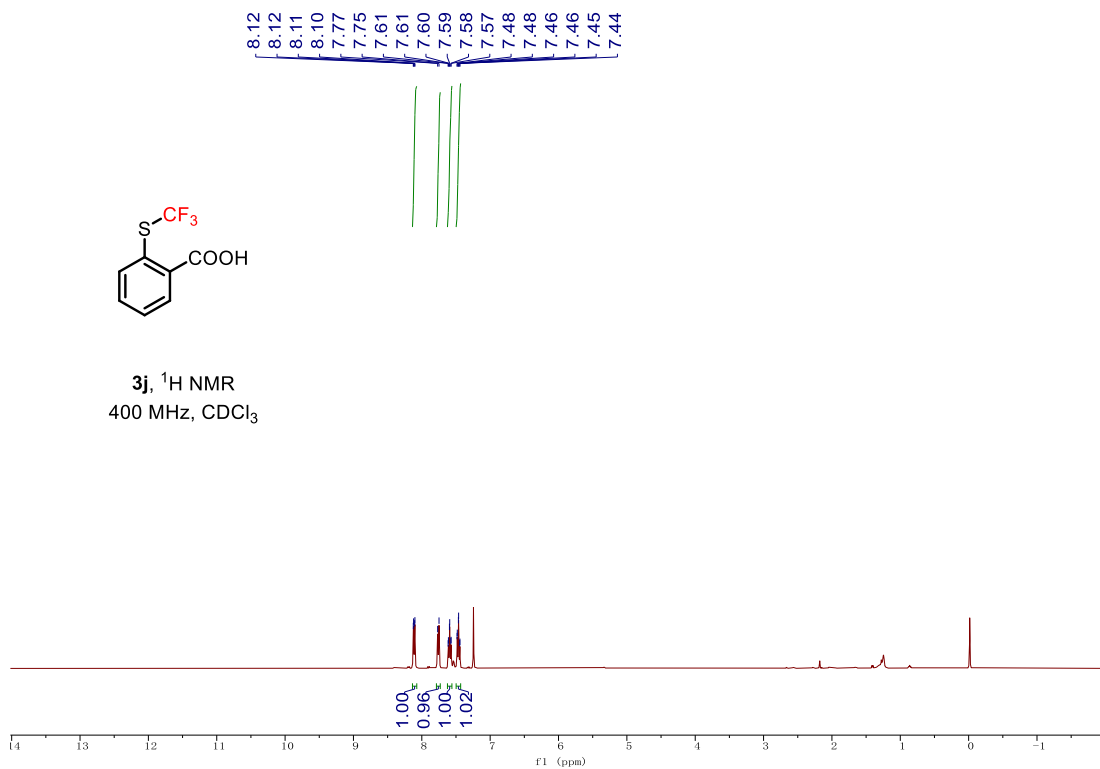

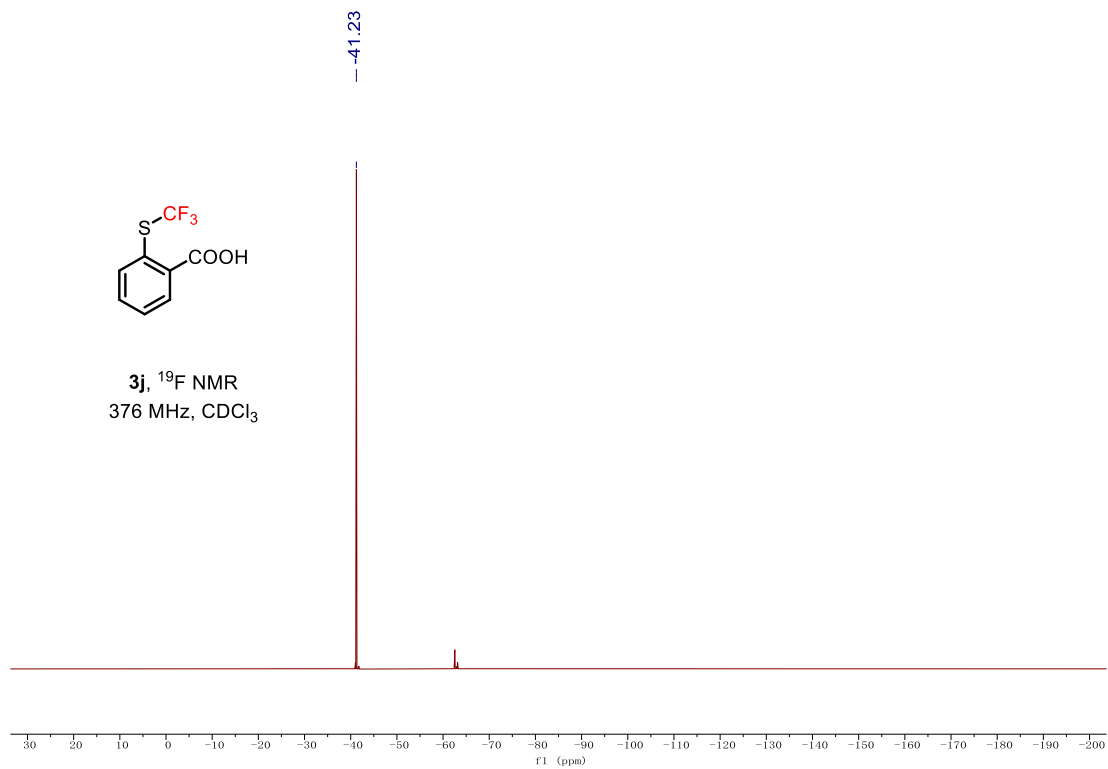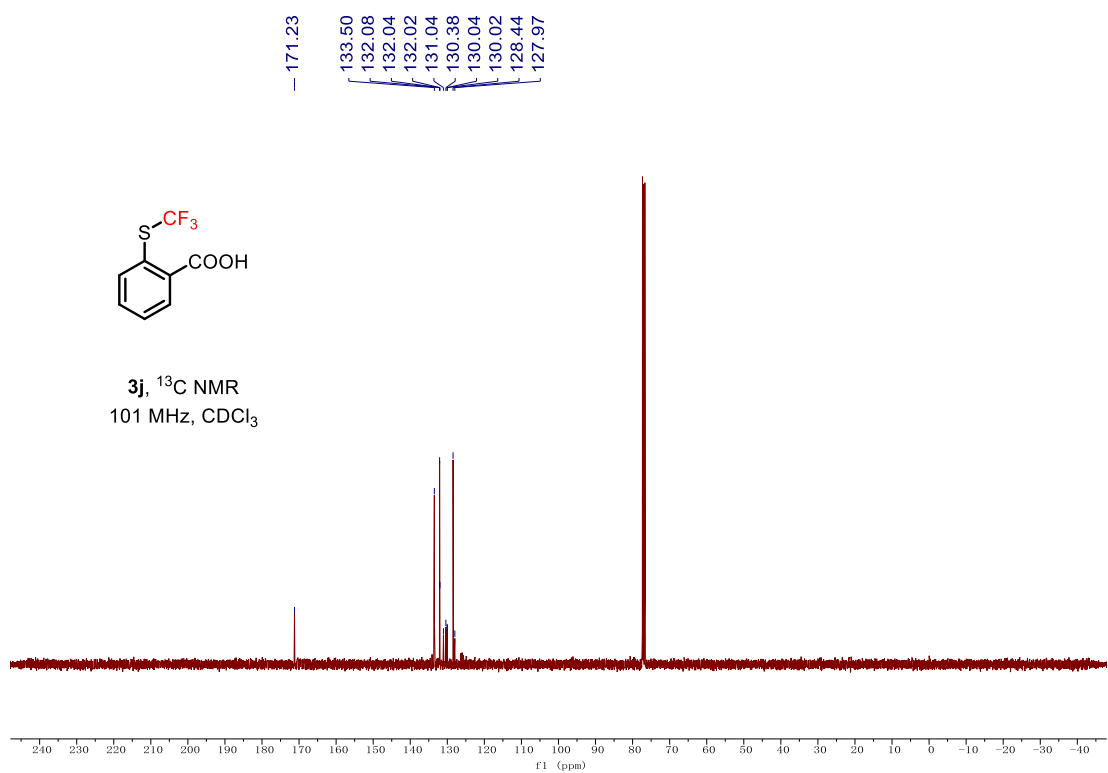

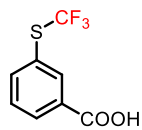

**3k**,  $^1\text{H}$  NMR  
400 MHz,  $\text{CDCl}_3$

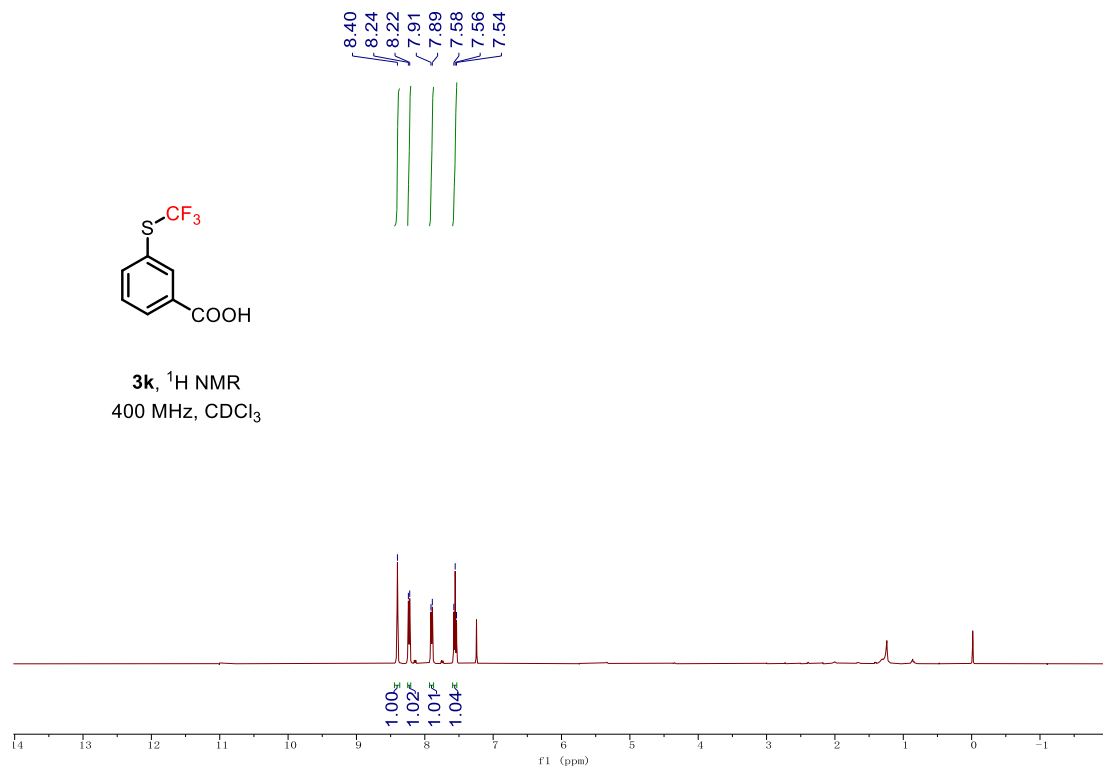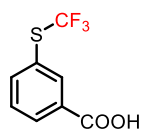

**3k**,  $^{19}\text{F}$  NMR  
376 MHz,  $\text{CDCl}_3$

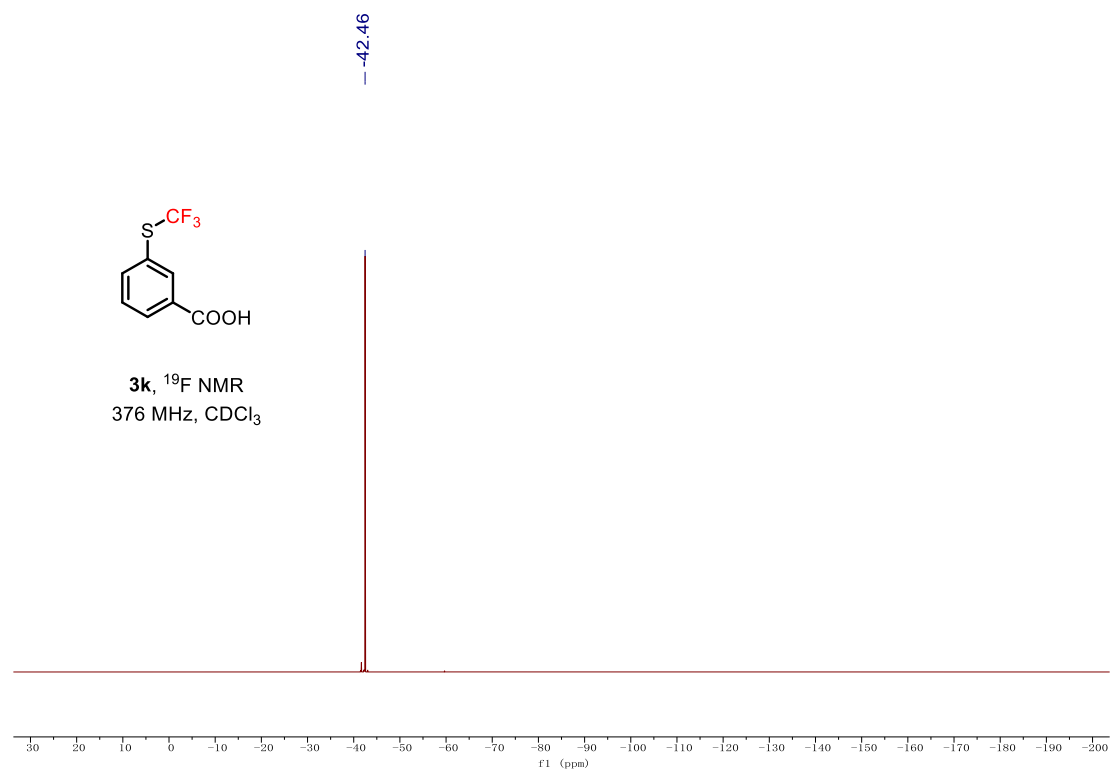

171.00  
141.29  
137.83  
133.97  
132.48  
130.89  
130.81  
129.77  
127.82  
125.44  
125.42  
124.73

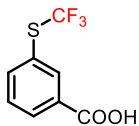

**3k**,  $^{13}\text{C}$  NMR  
101 MHz,  $\text{CDCl}_3$

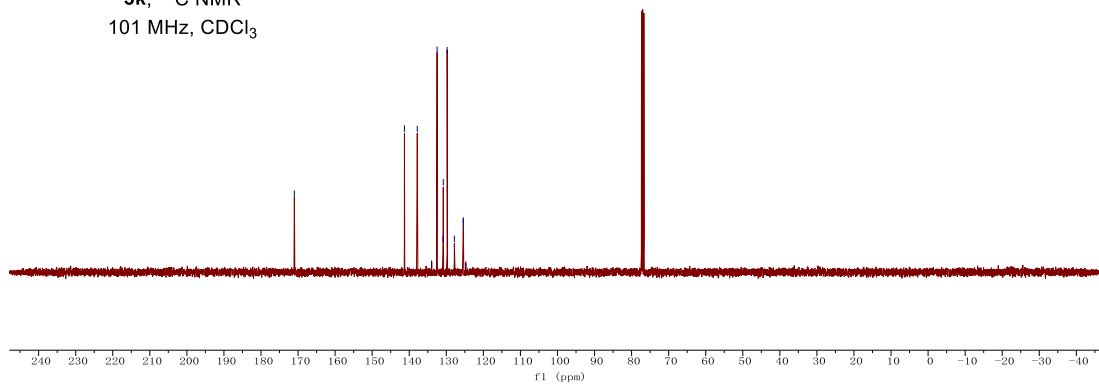

8.15  
8.13  
7.76  
7.74

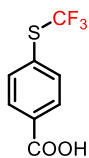

**3l**,  $^1\text{H}$  NMR  
400 MHz,  $\text{CDCl}_3$

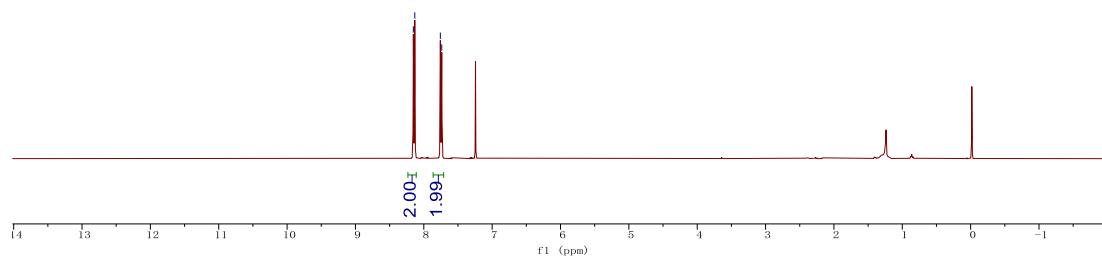

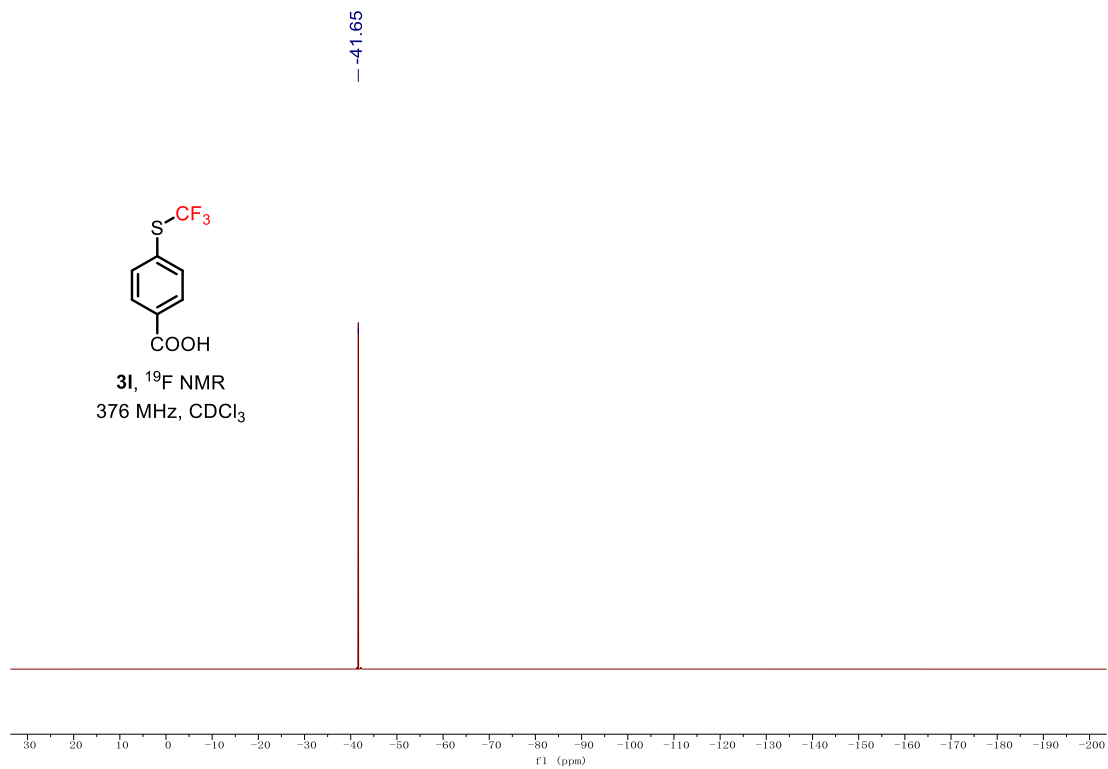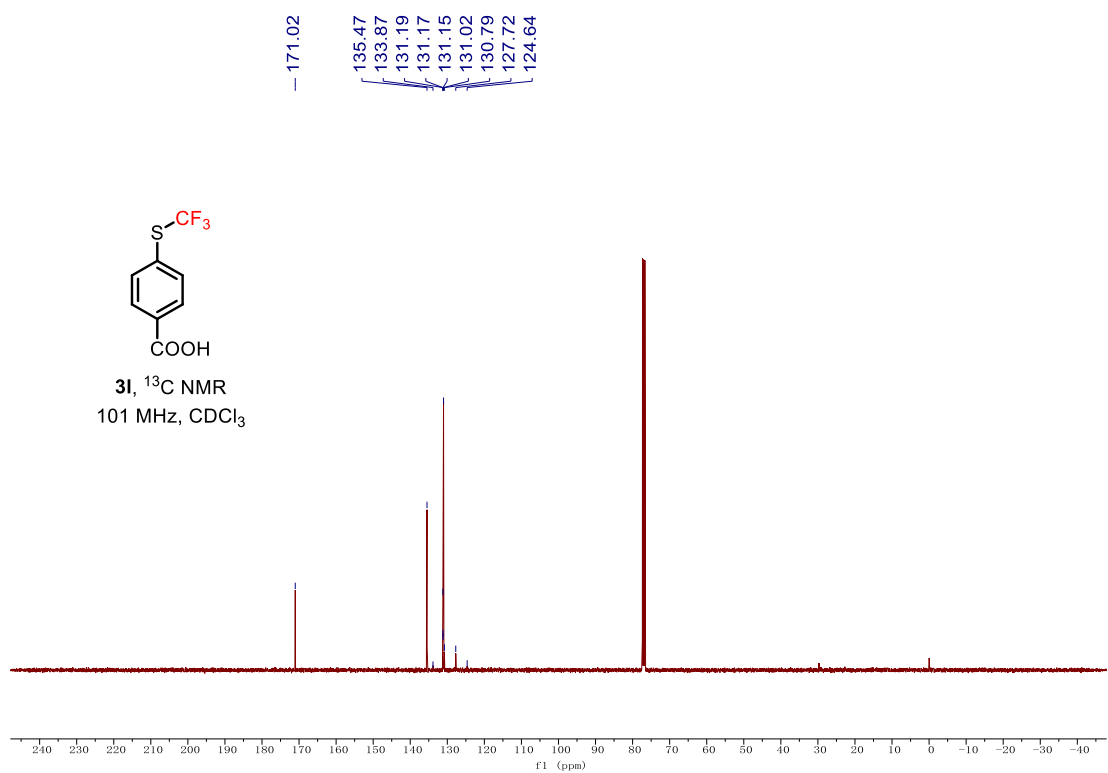



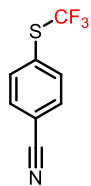

**3m**,  $^1\text{H}$  NMR  
400 MHz,  $\text{CDCl}_3$

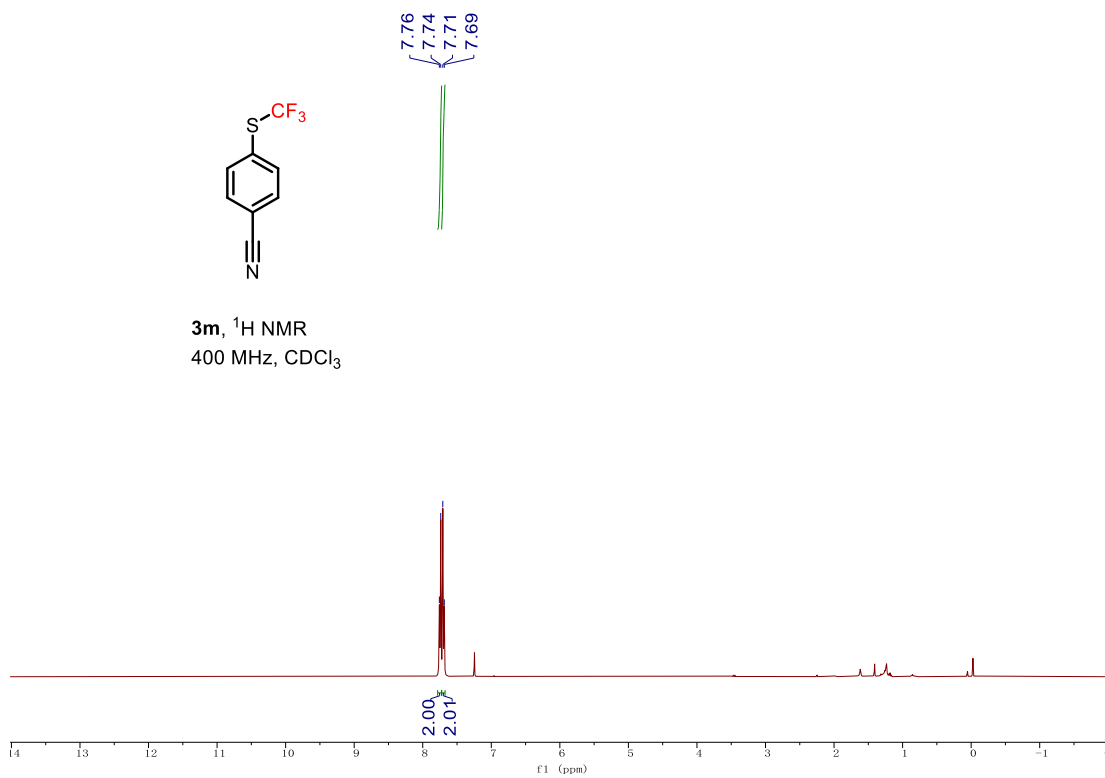

-41.56

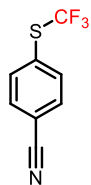

**3m**,  $^{19}\text{F}$  NMR  
376 MHz,  $\text{CDCl}_3$

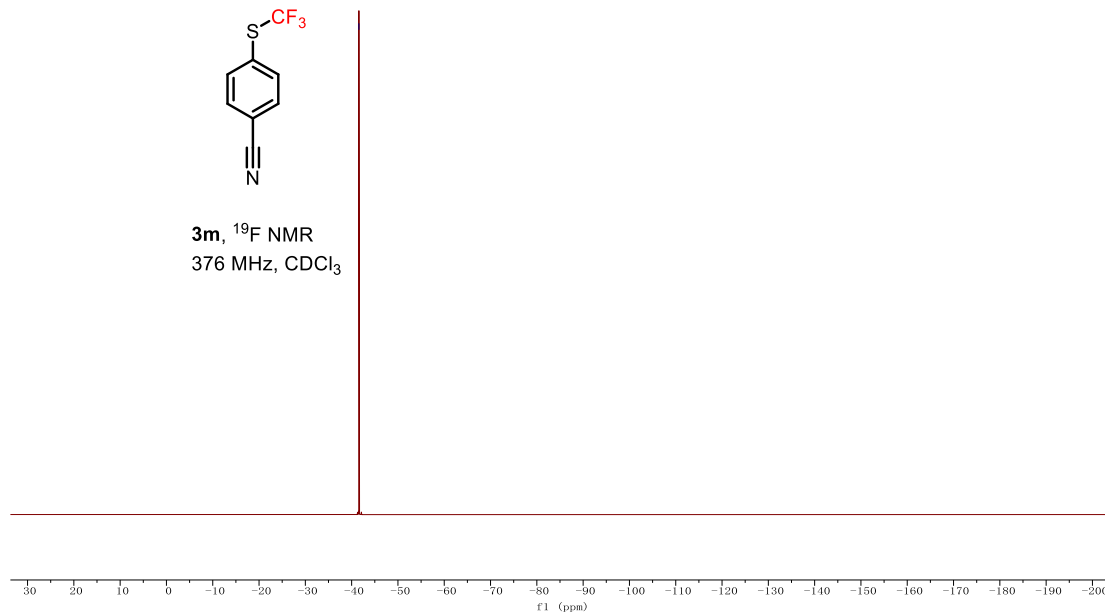

135.99  
133.64  
130.55  
127.50  
124.43  
117.61  
114.68

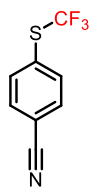

**3m**,  $^{13}\text{C}$  NMR  
101 MHz,  $\text{CDCl}_3$

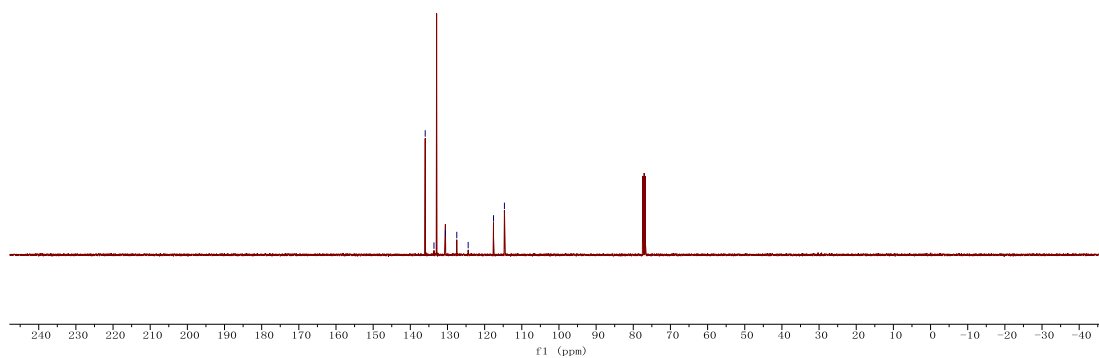

7.98  
7.96  
7.74  
7.72

2.61

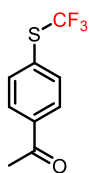

**3n**,  $^1\text{H}$  NMR  
400 MHz,  $\text{CDCl}_3$

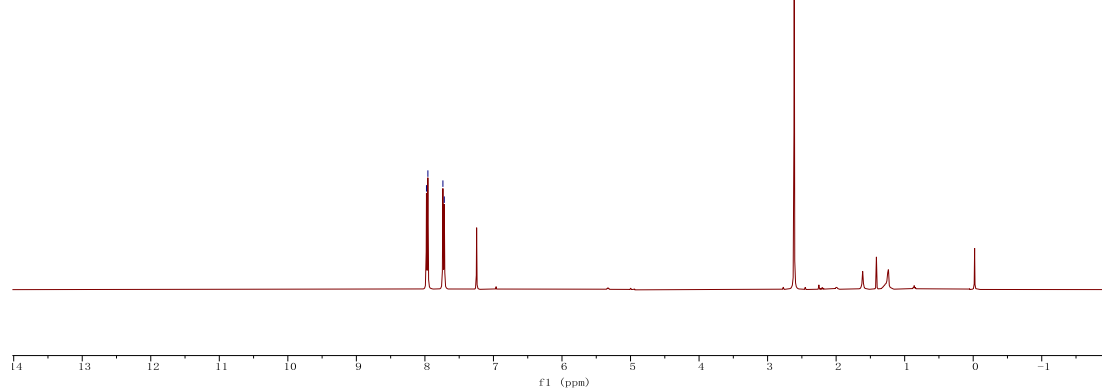

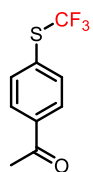

**3n**,  $^{19}\text{F}$  NMR  
376 MHz,  $\text{CDCl}_3$

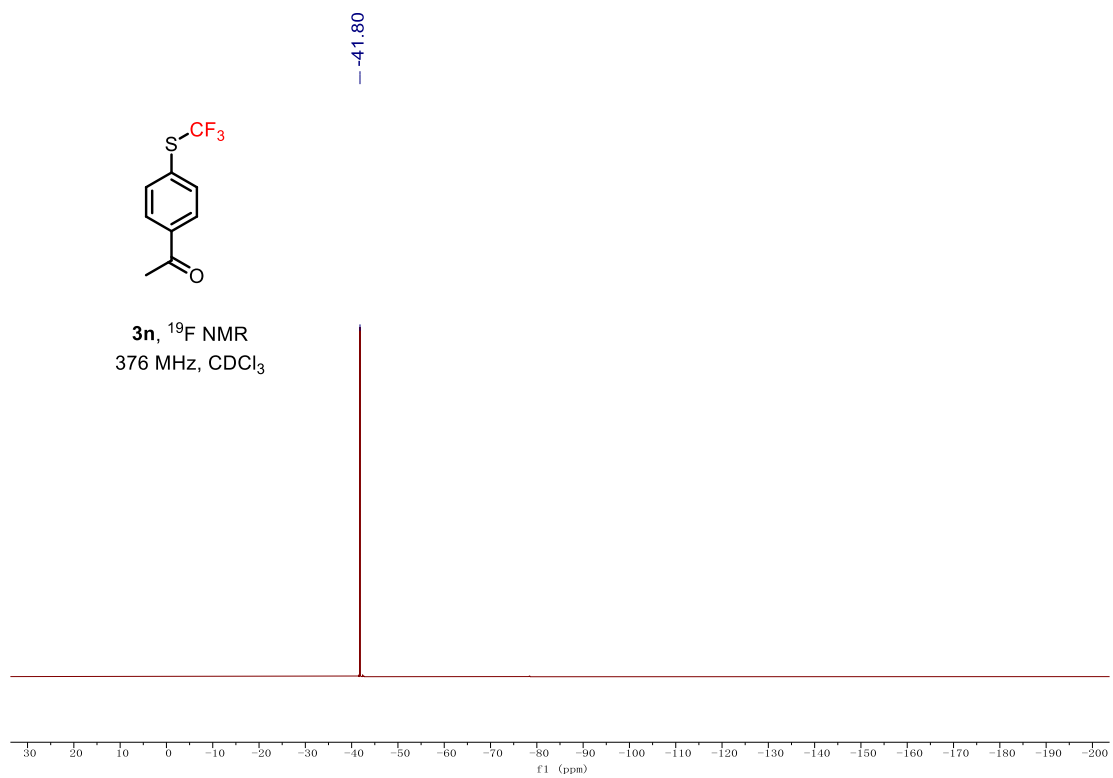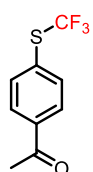

**3n**,  $^{13}\text{C}$  NMR  
101 MHz,  $\text{CDCl}_3$

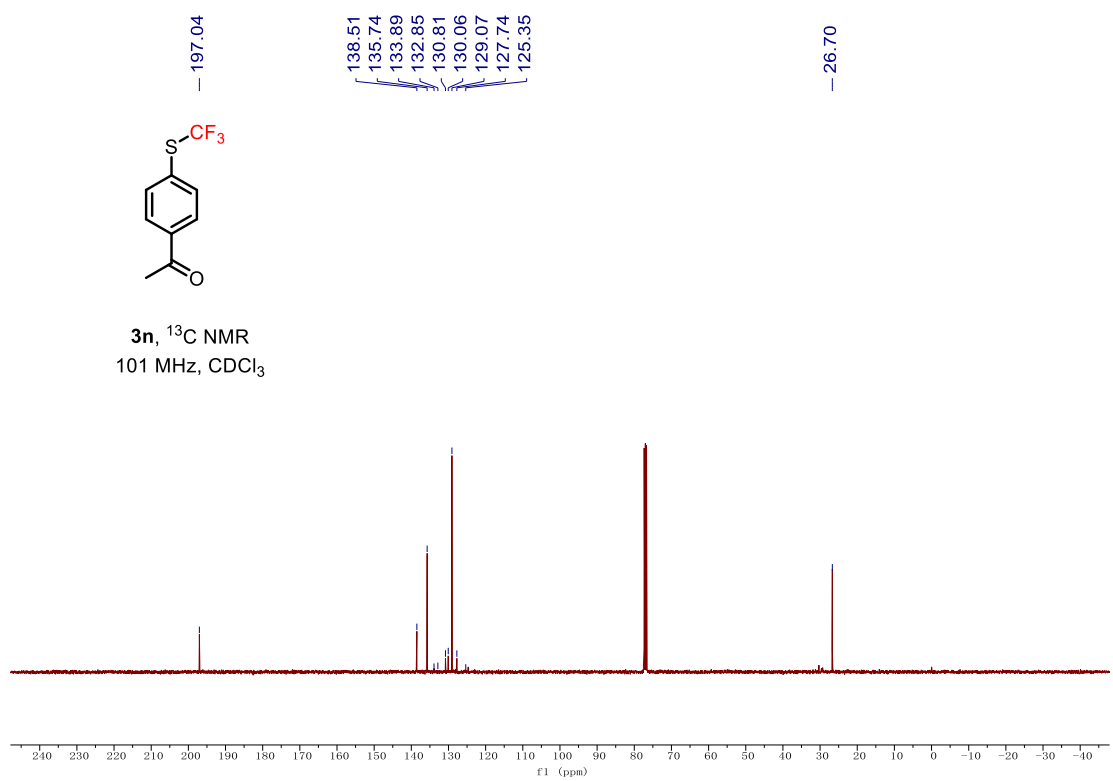

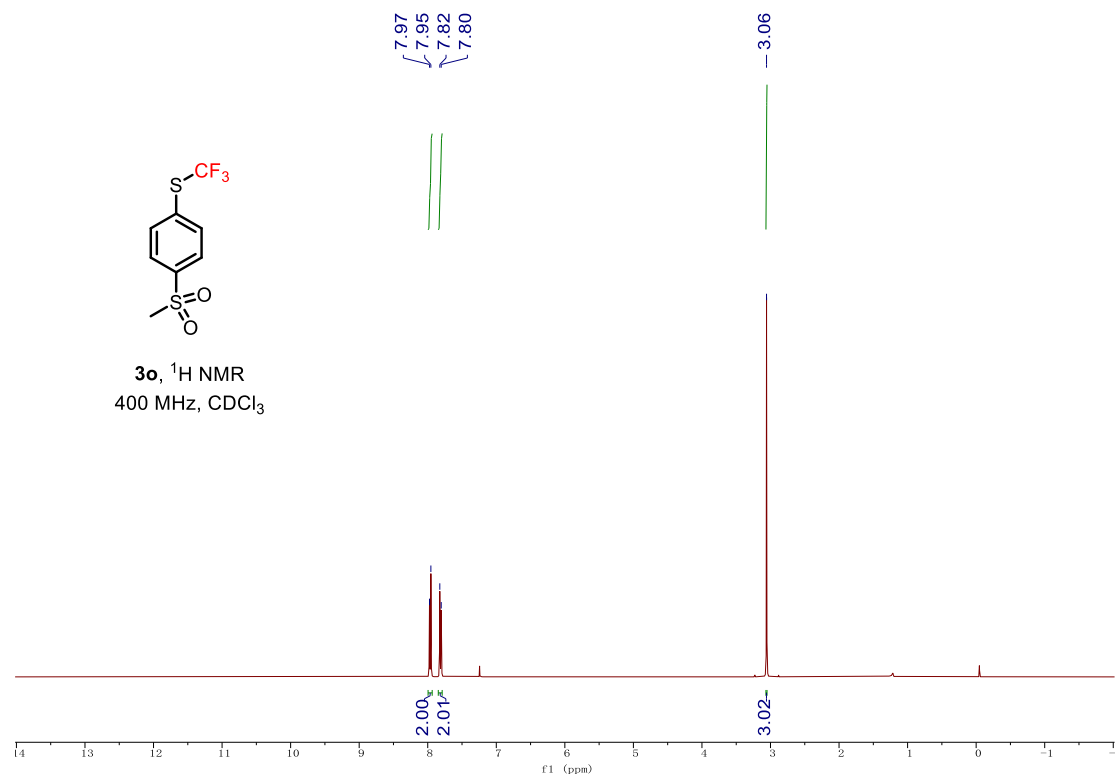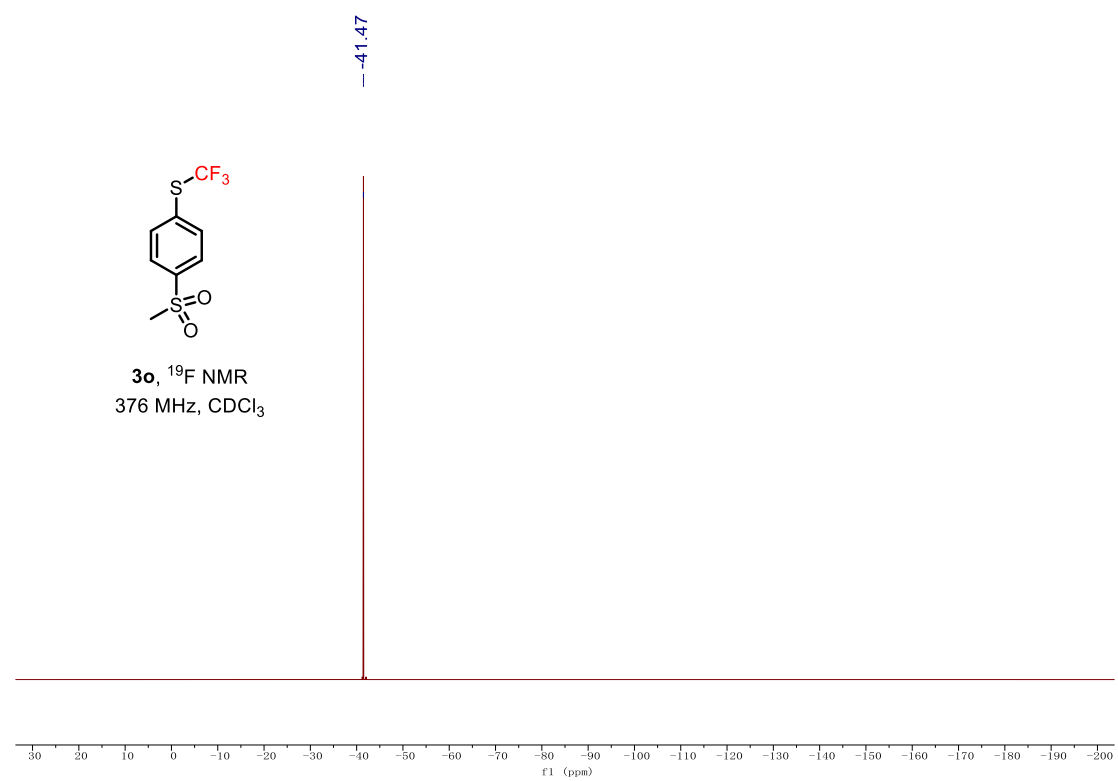

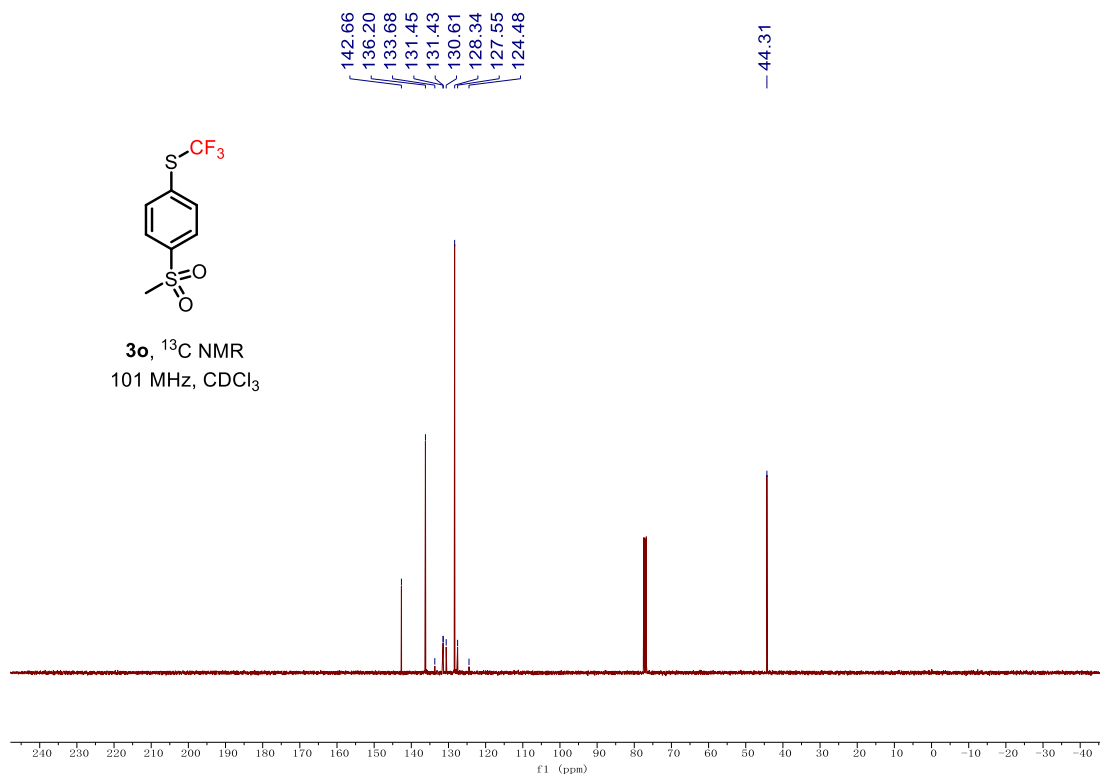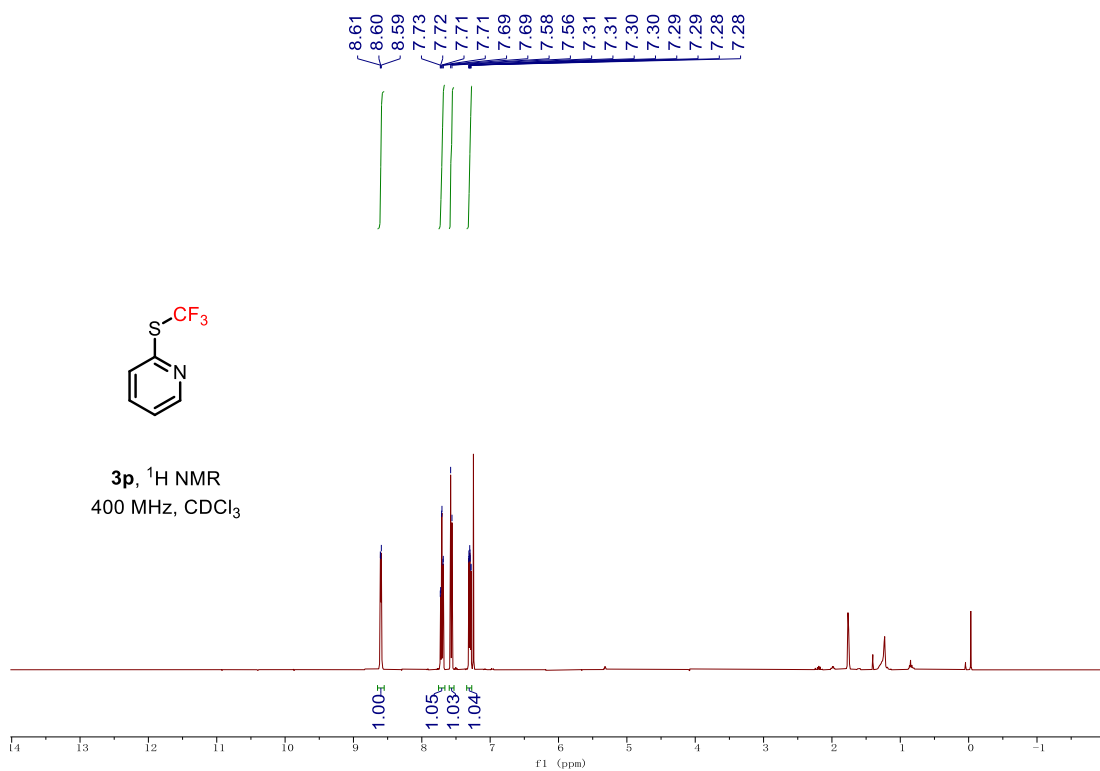

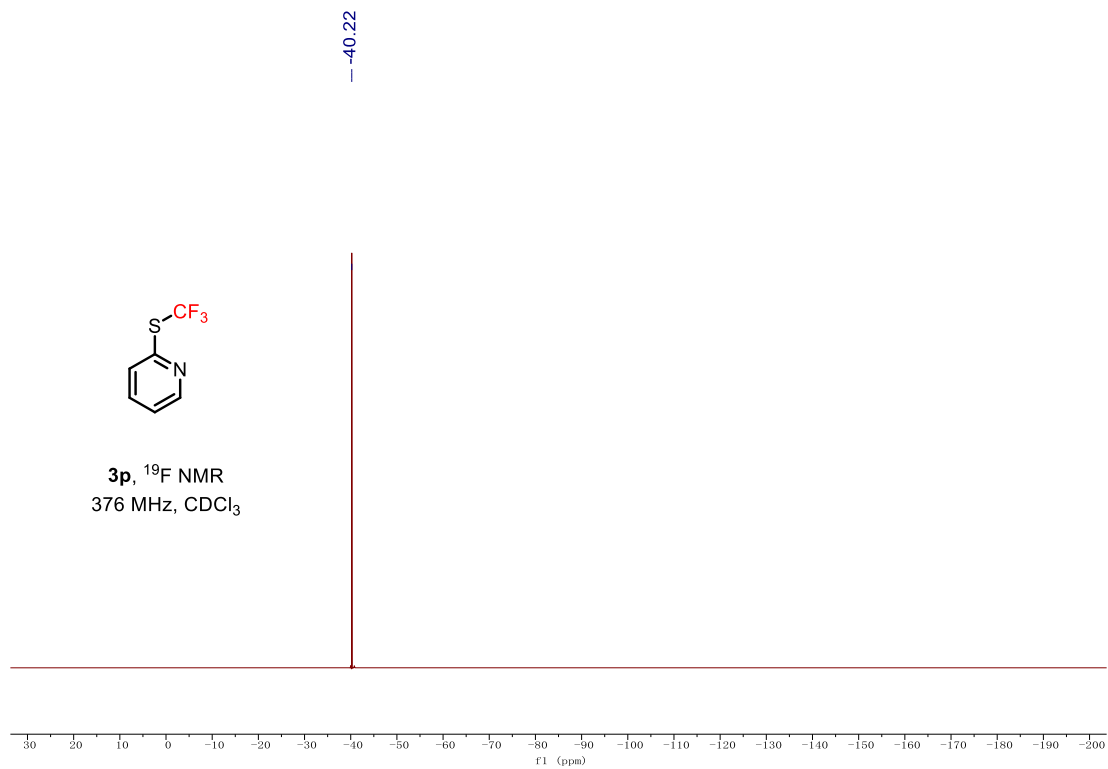

150.68  
149.49  
149.46  
137.66  
133.44  
130.92  
128.18  
127.86  
124.80  
123.80

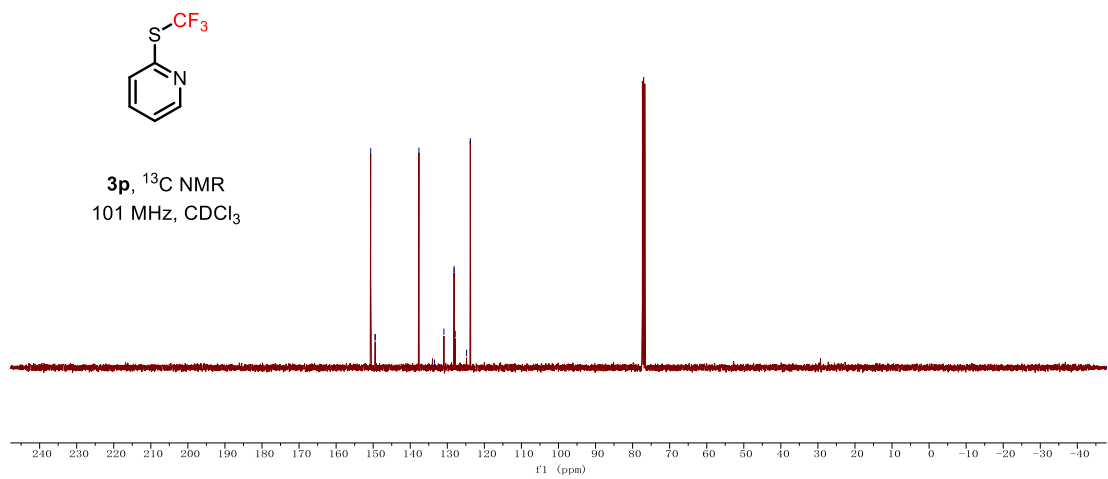

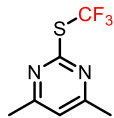

**3q**,  $^1\text{H}$  NMR  
400 MHz,  $\text{CDCl}_3$

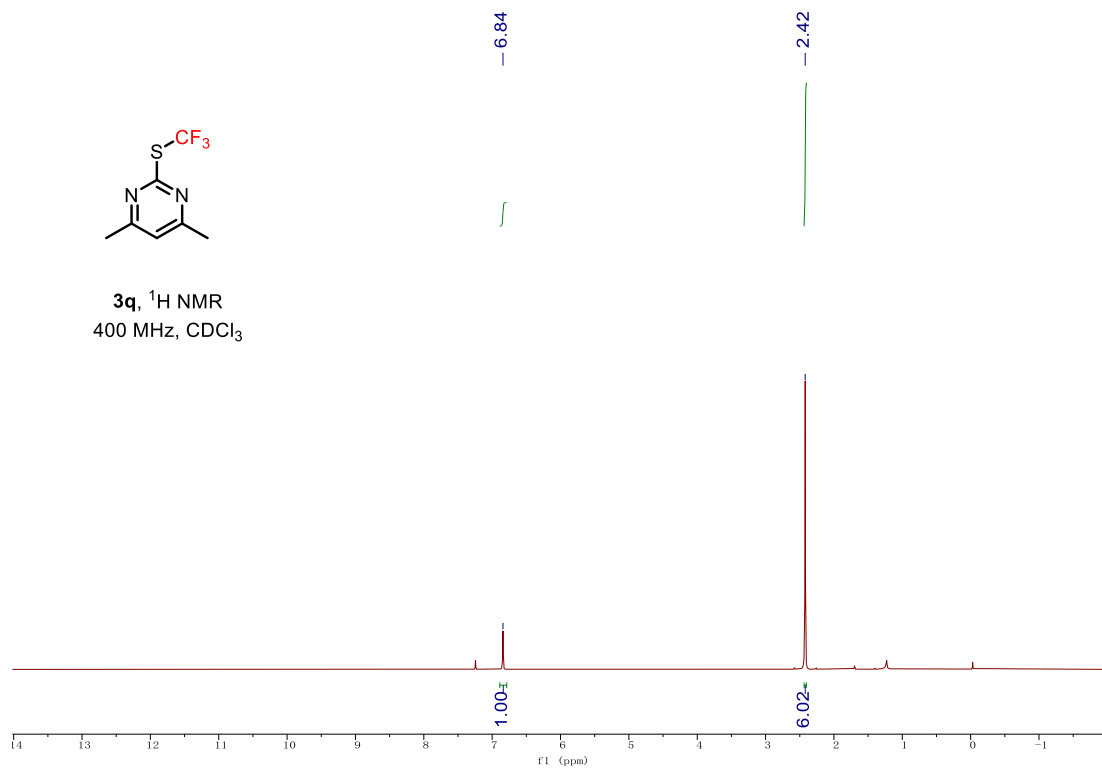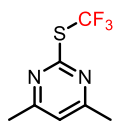

**3q**,  $^{19}\text{F}$  NMR  
376 MHz,  $\text{CDCl}_3$

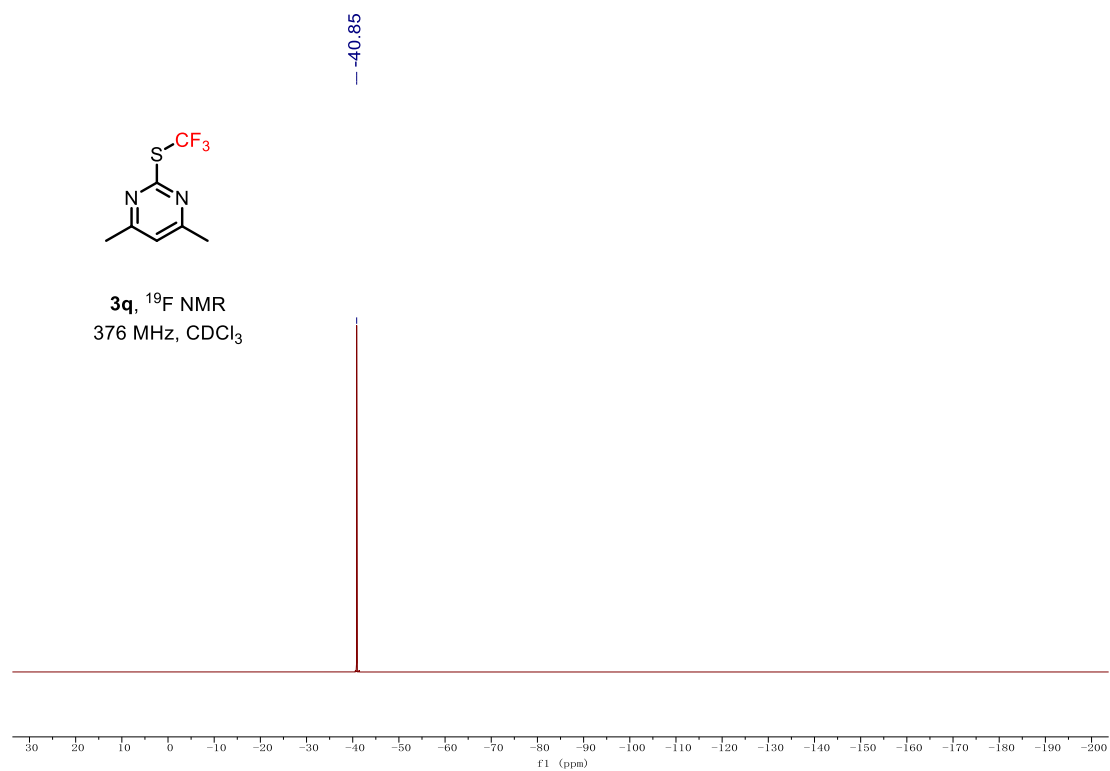



**3q**,  $^{13}\text{C}$  NMR  
101 MHz,  $\text{CDCl}_3$

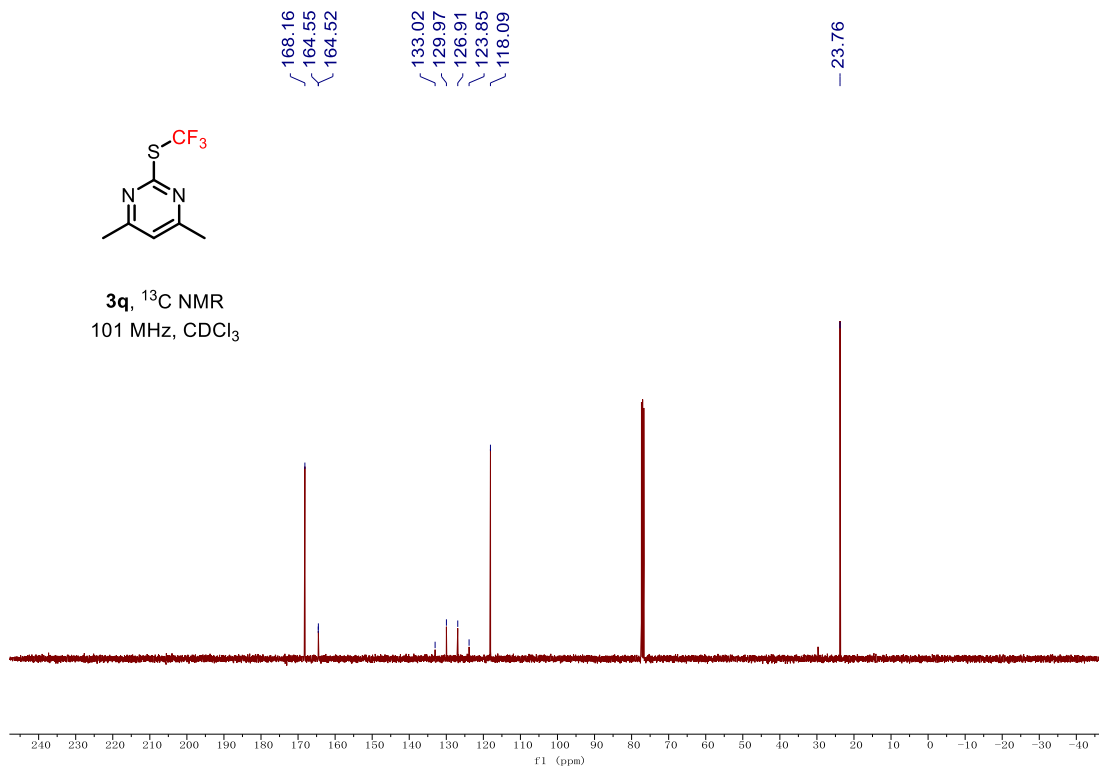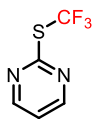

**3r**,  $^1\text{H}$  NMR  
400 MHz,  $\text{CDCl}_3$

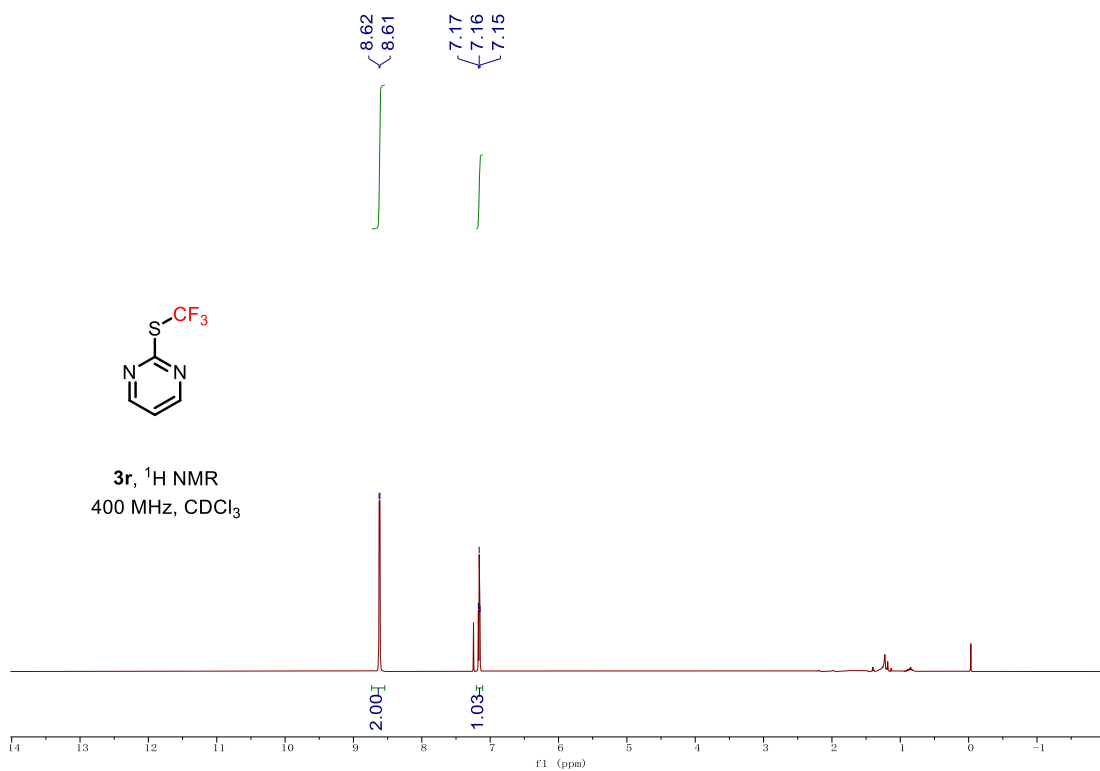



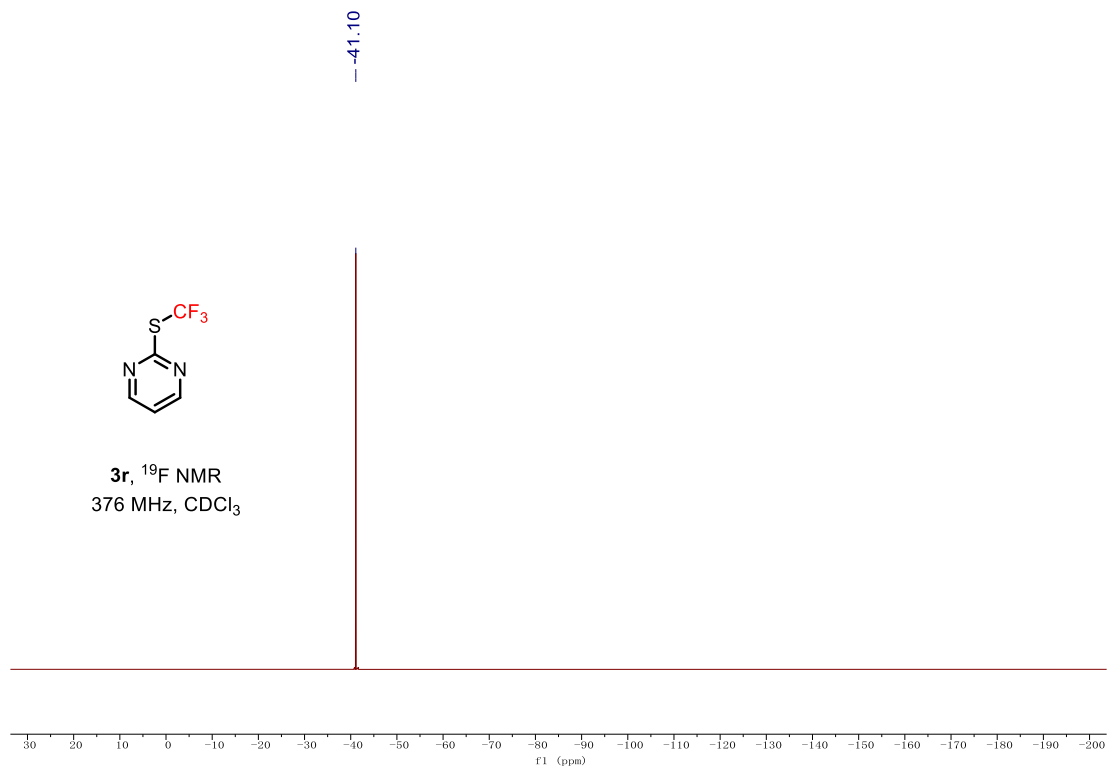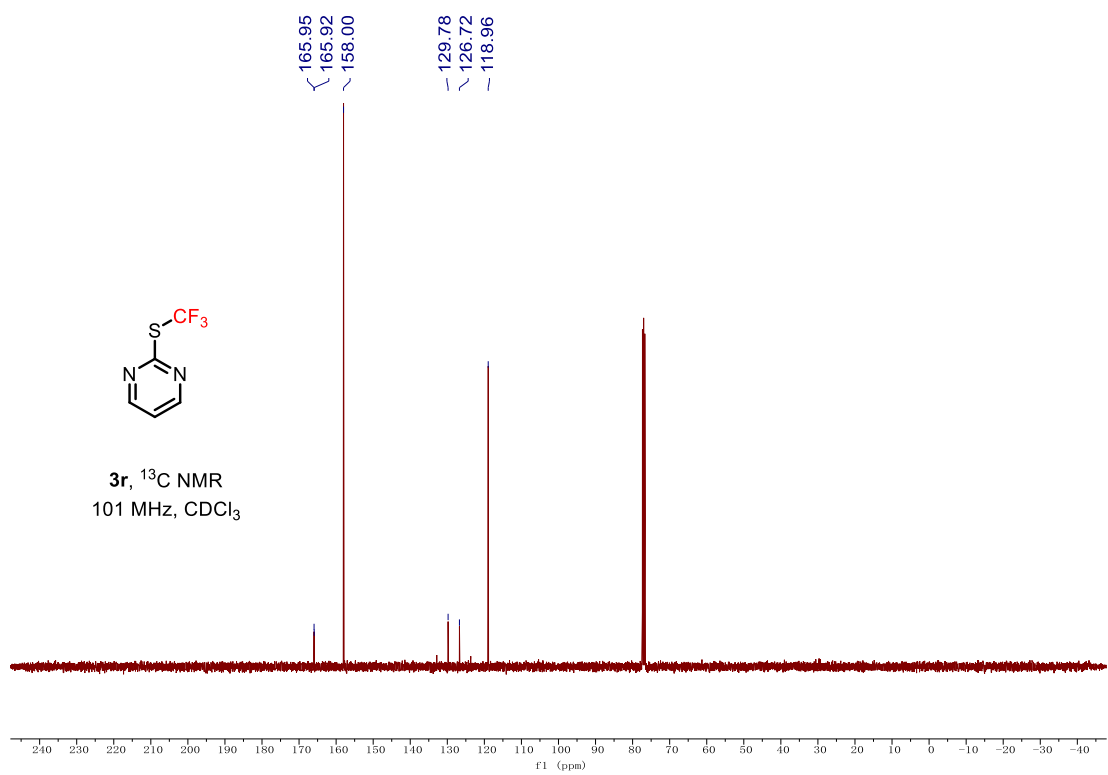

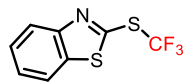

**3s**,  $^1\text{H}$  NMR  
400 MHz,  $\text{CDCl}_3$

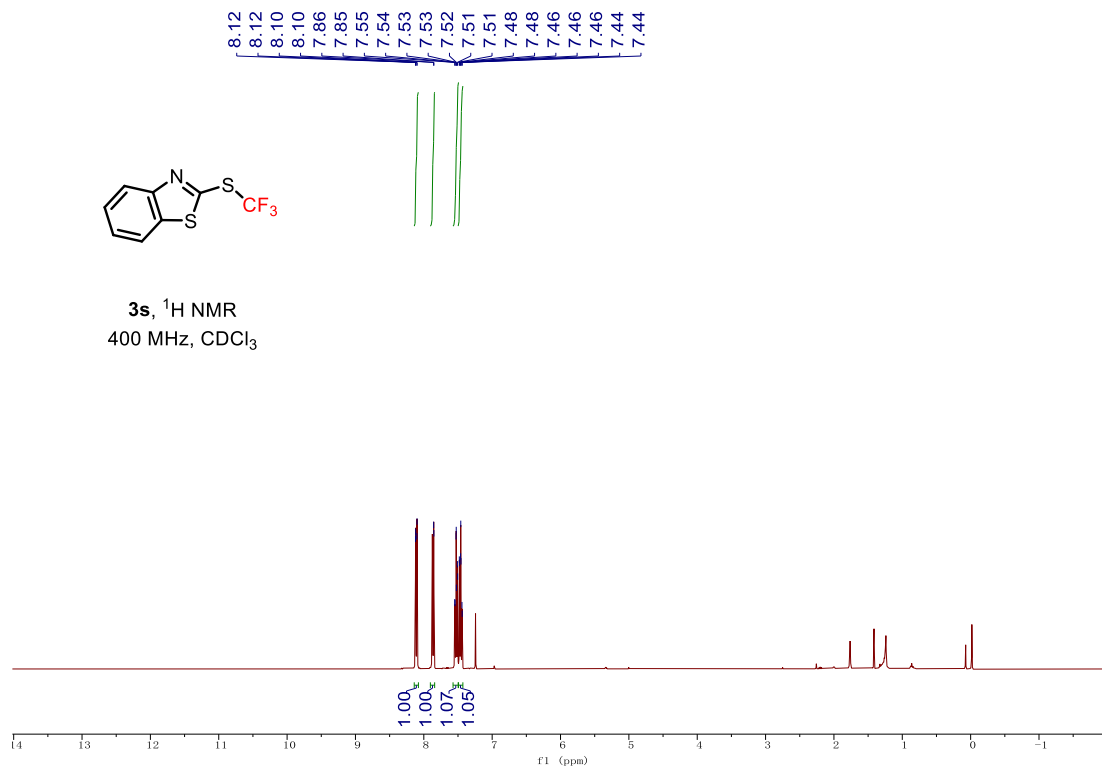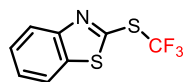

**3s**,  $^{19}\text{F}$  NMR  
376 MHz,  $\text{CDCl}_3$

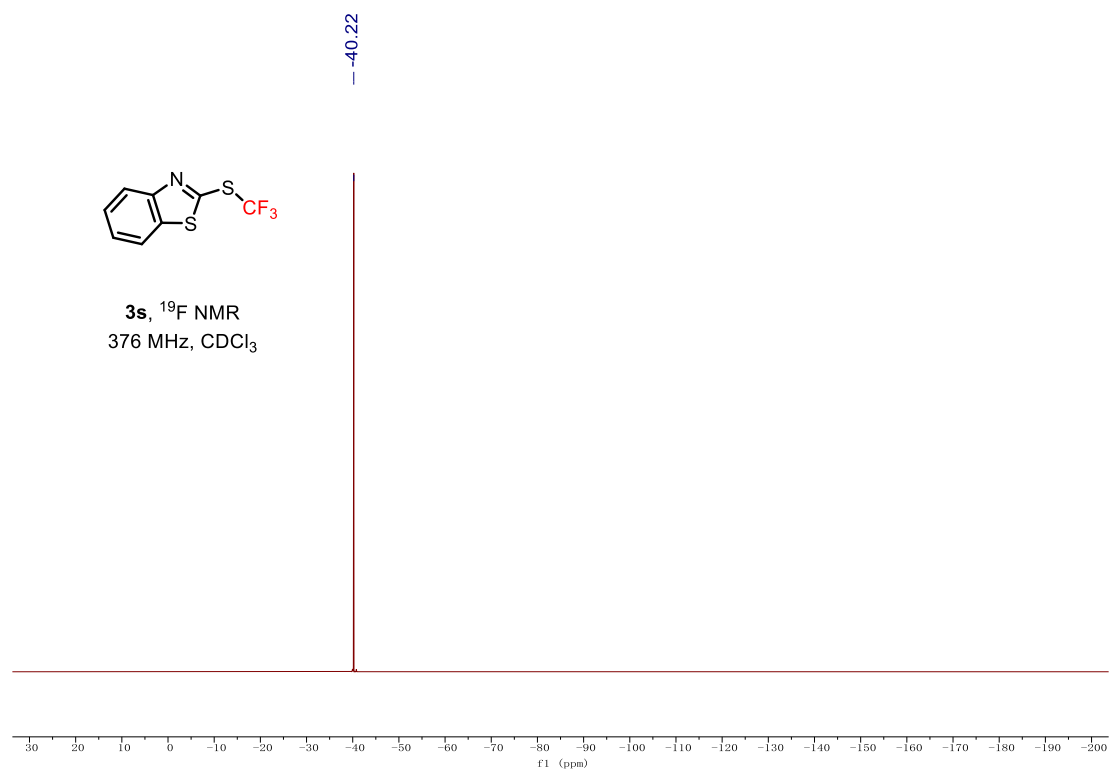

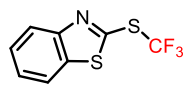

**3s**,  $^{13}\text{C}$  NMR  
101 MHz,  $\text{CDCl}_3$

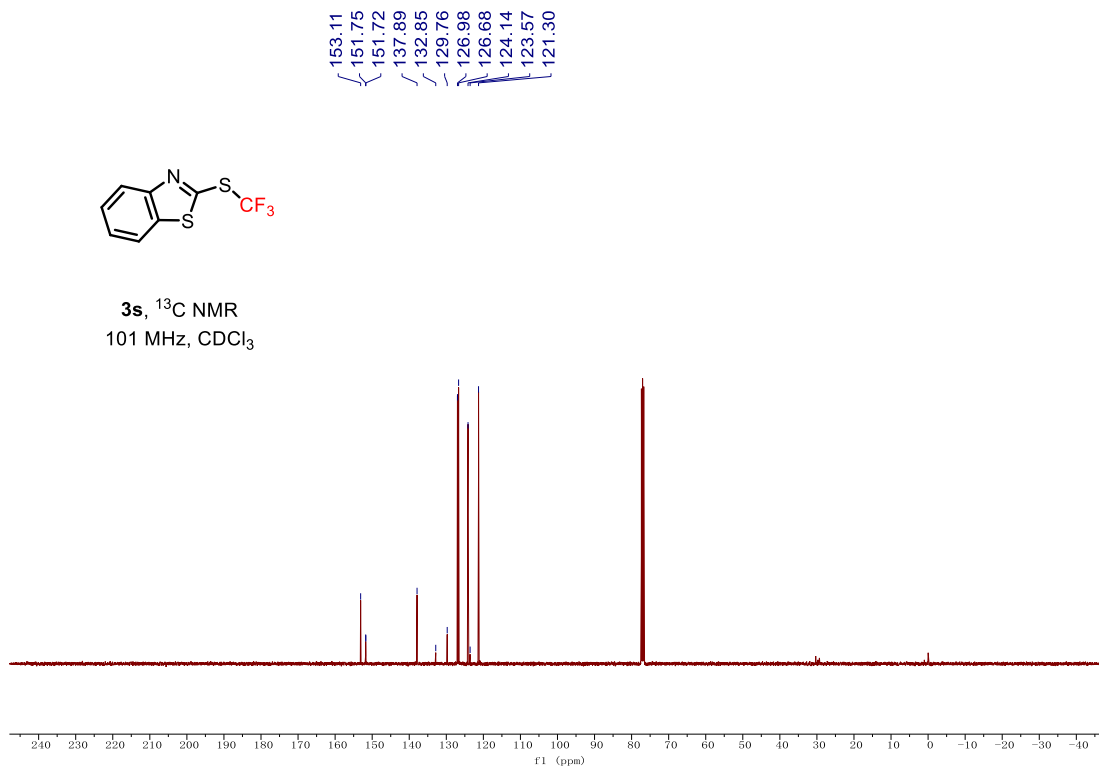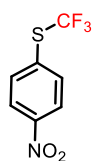

**3t**,  $^1\text{H}$  NMR  
400 MHz,  $\text{CDCl}_3$

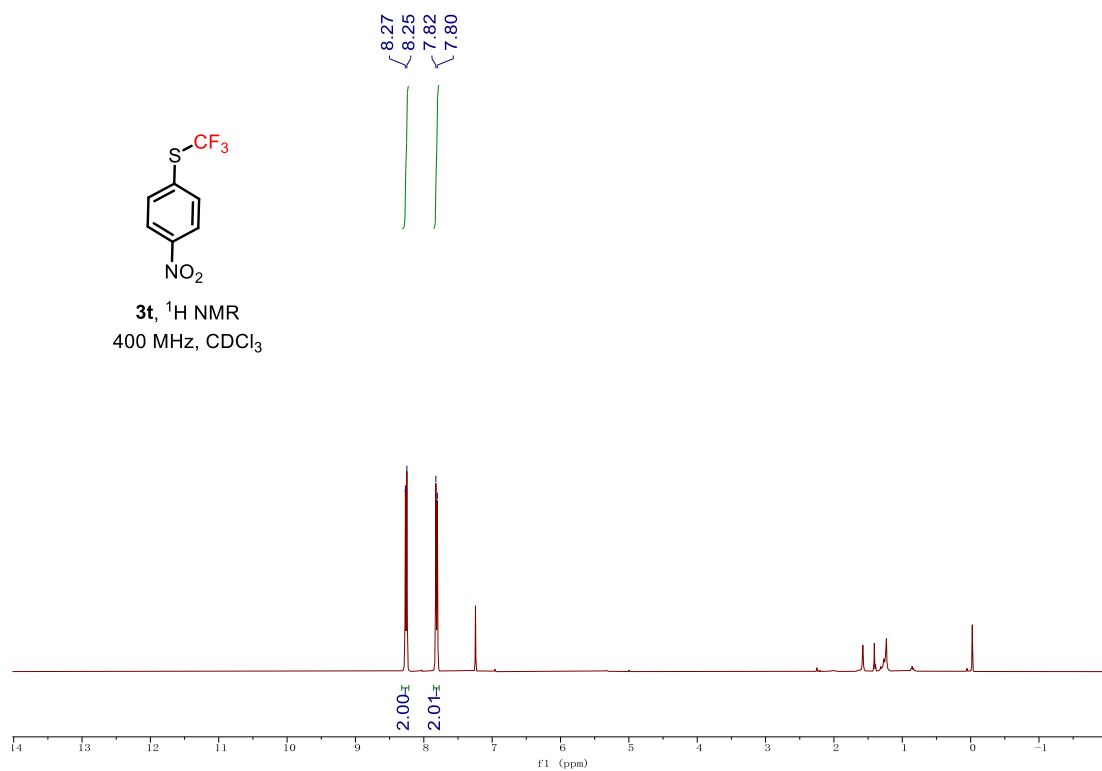

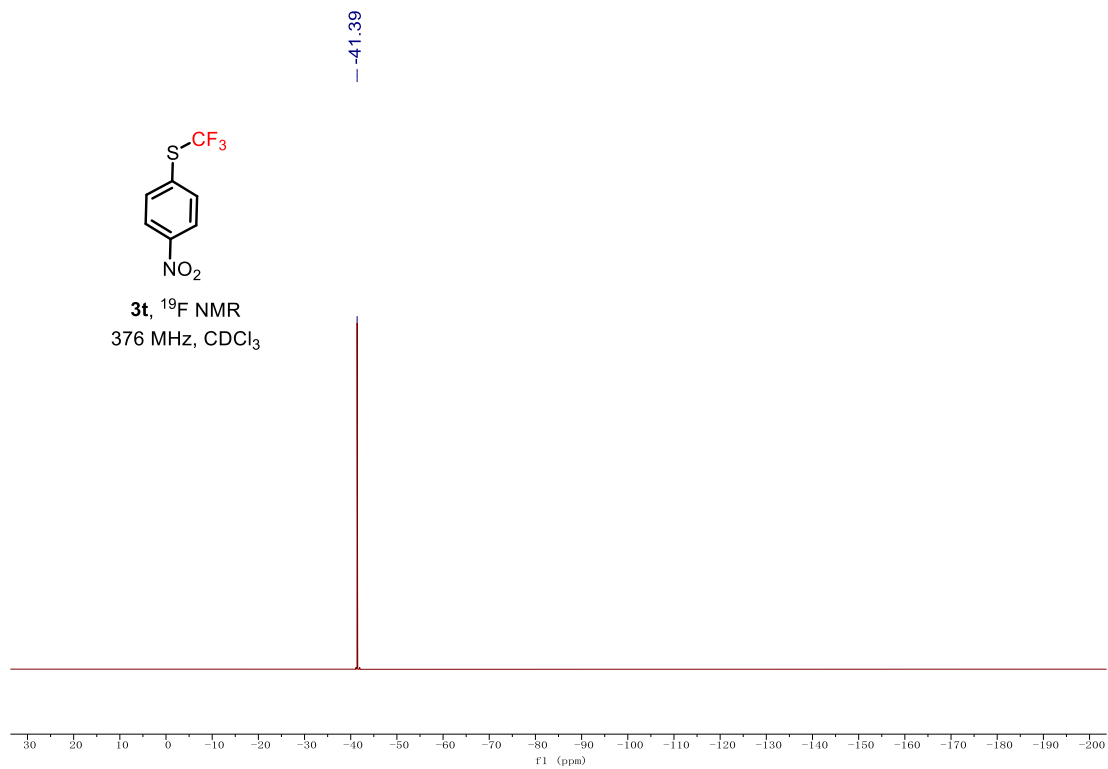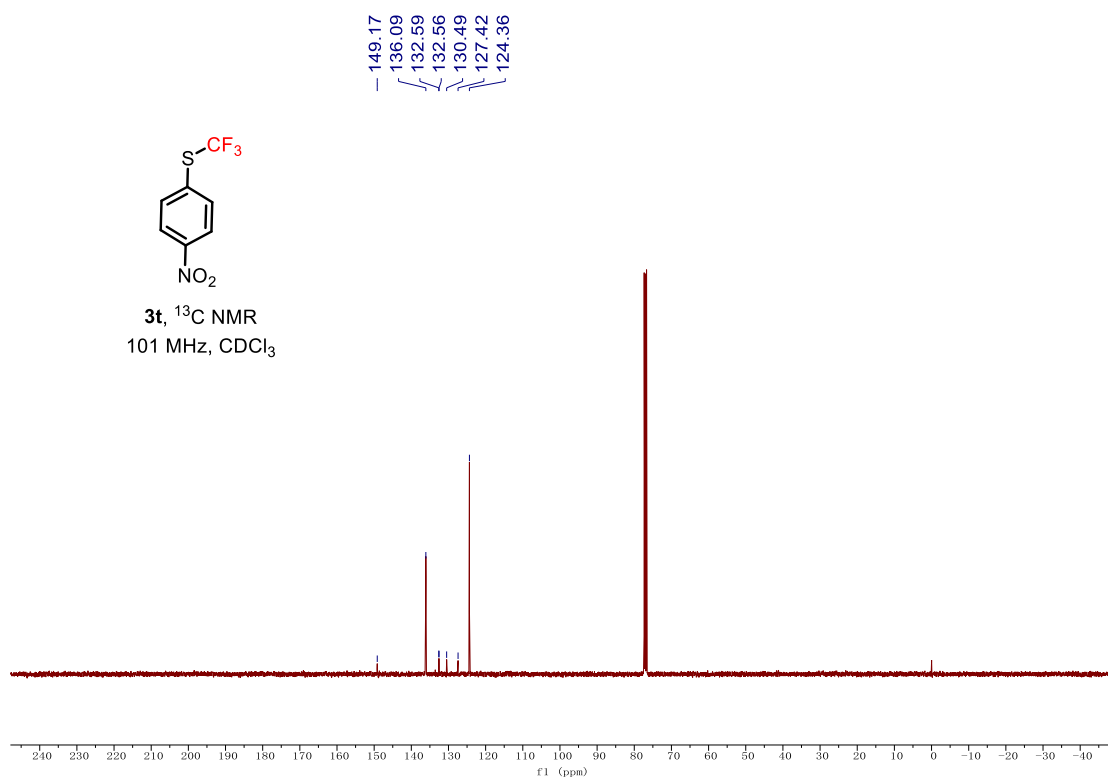

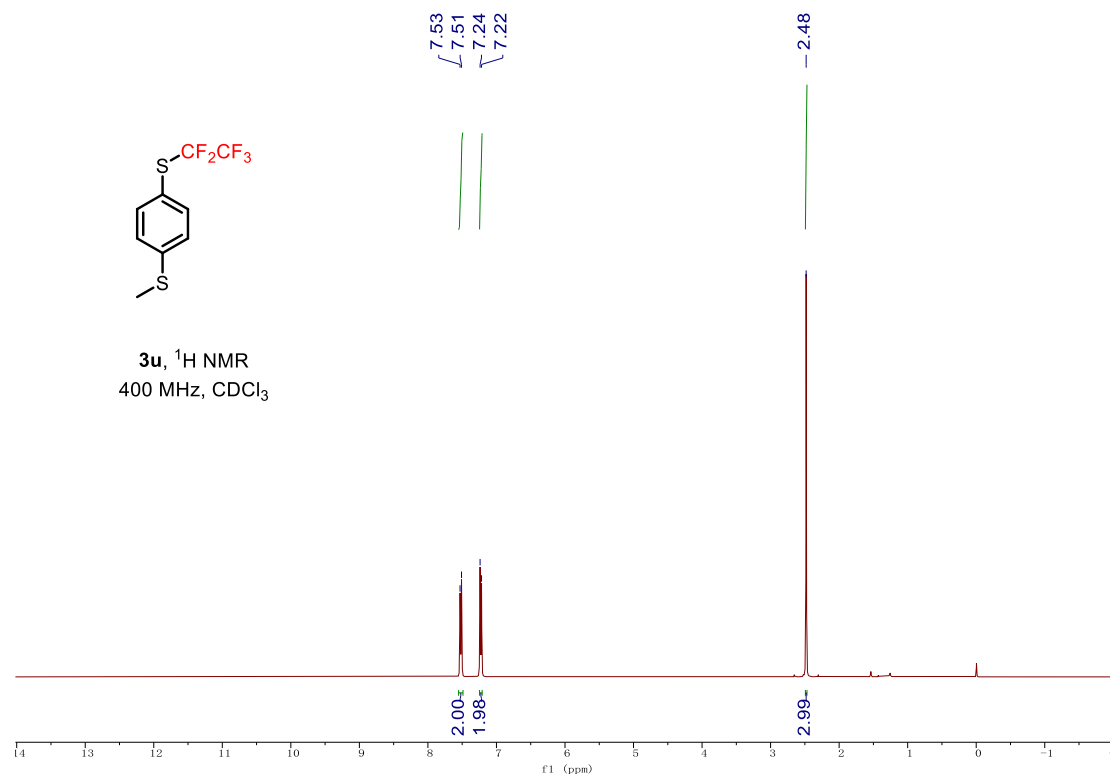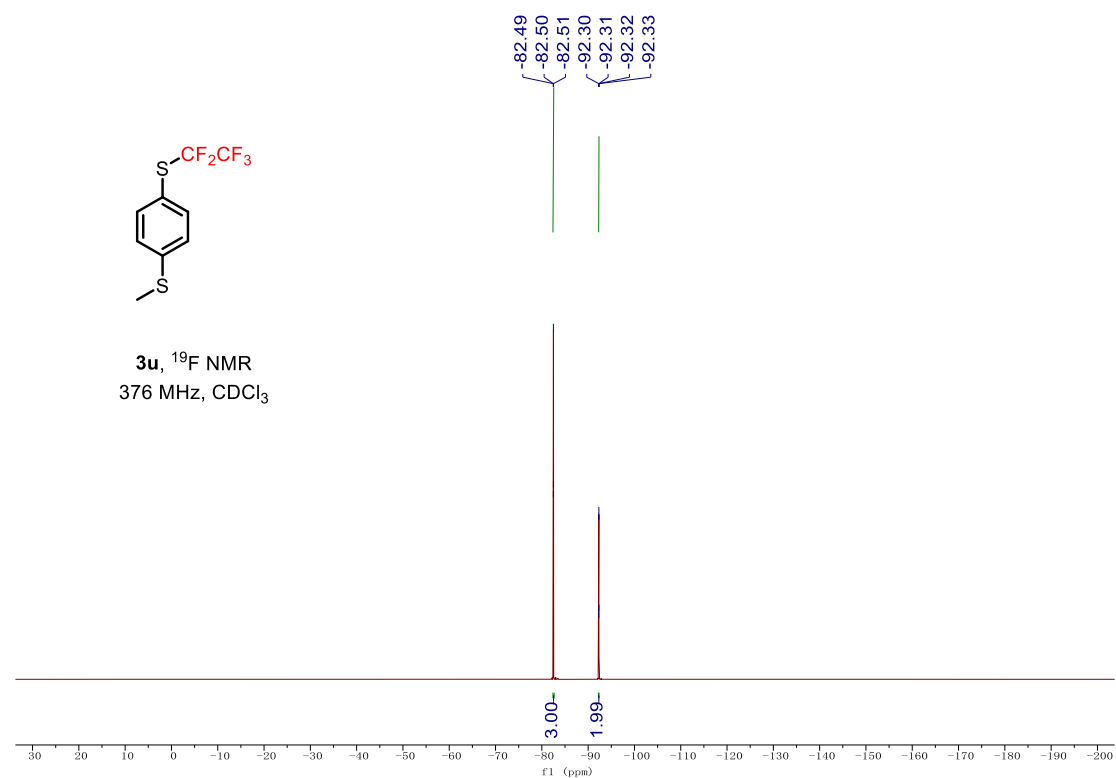

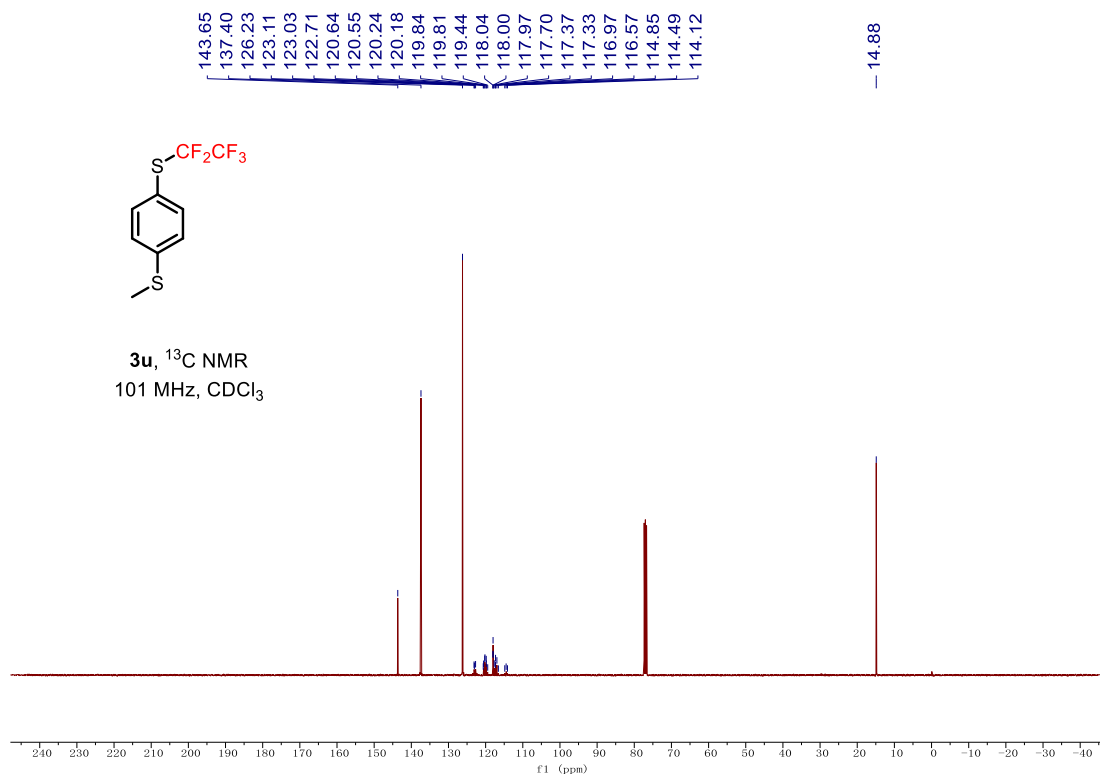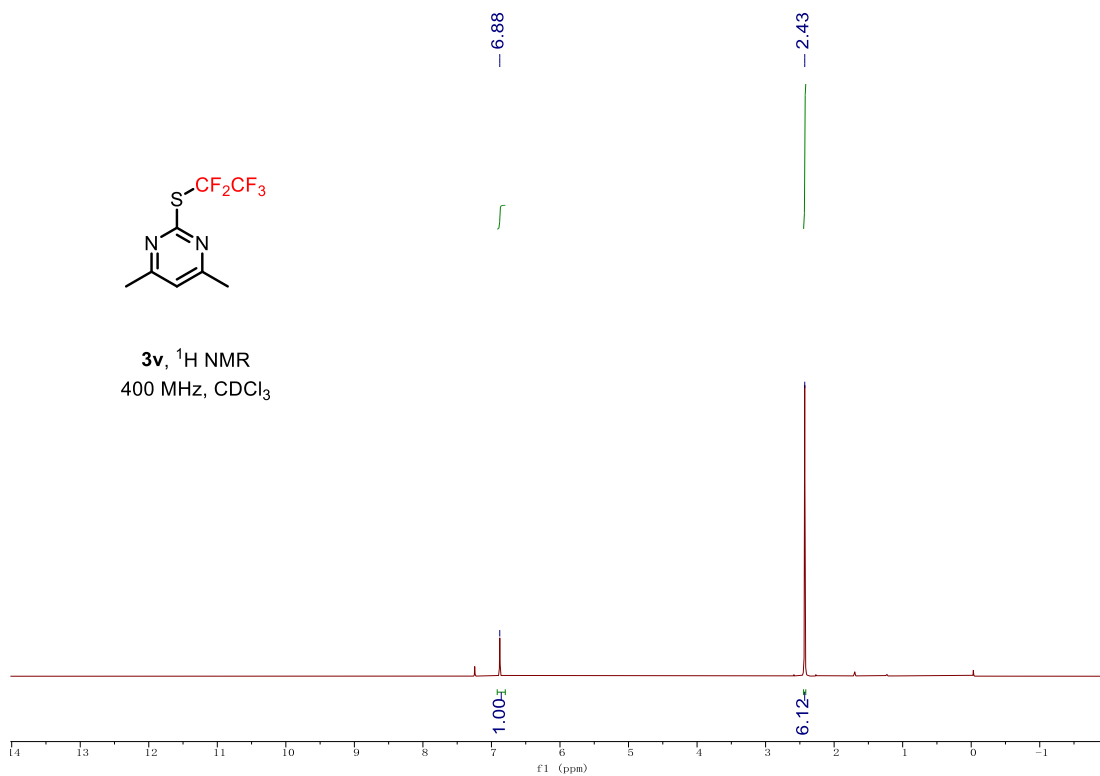

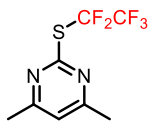

**3v**,  $^{19}\text{F}$  NMR  
376 MHz,  $\text{CDCl}_3$

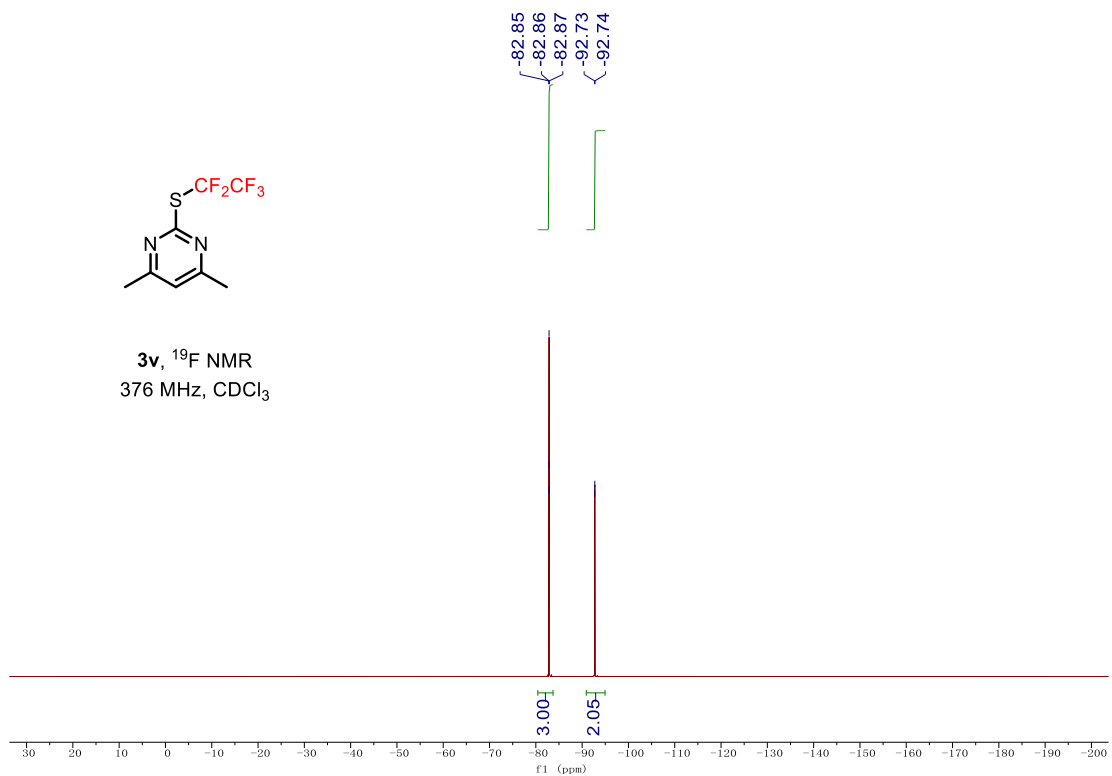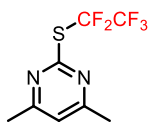

**3v**,  $^{13}\text{C}$  NMR  
101 MHz,  $\text{CDCl}_3$

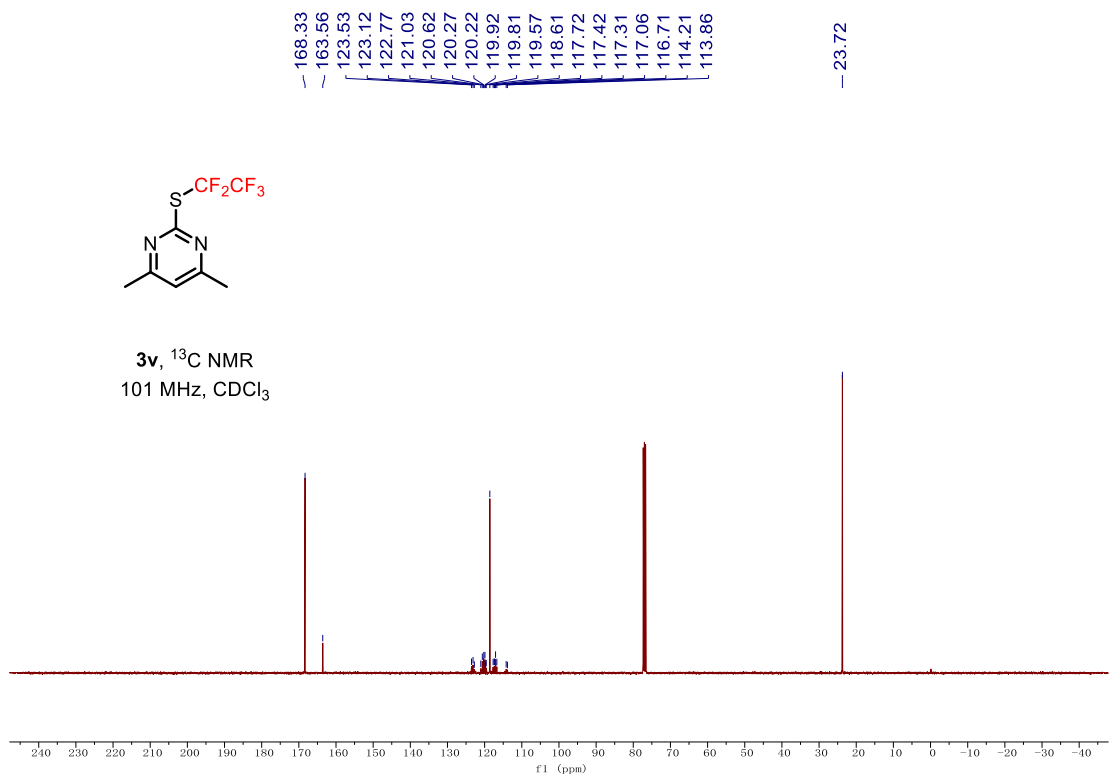

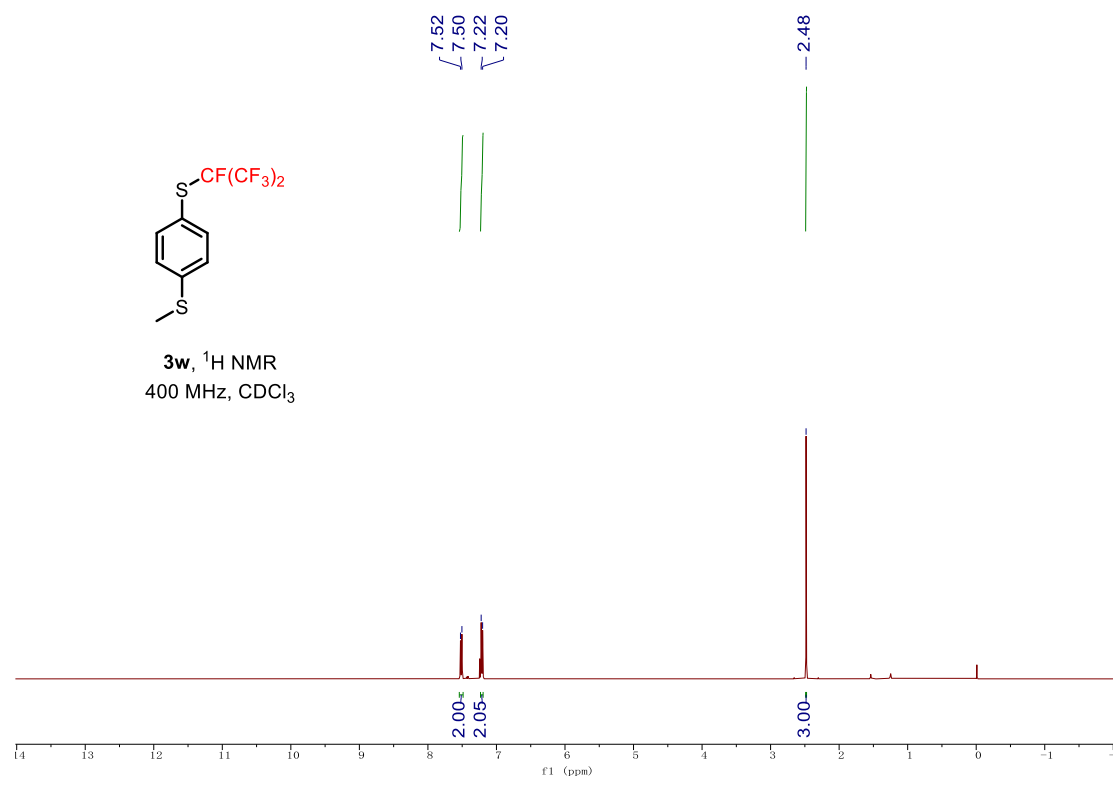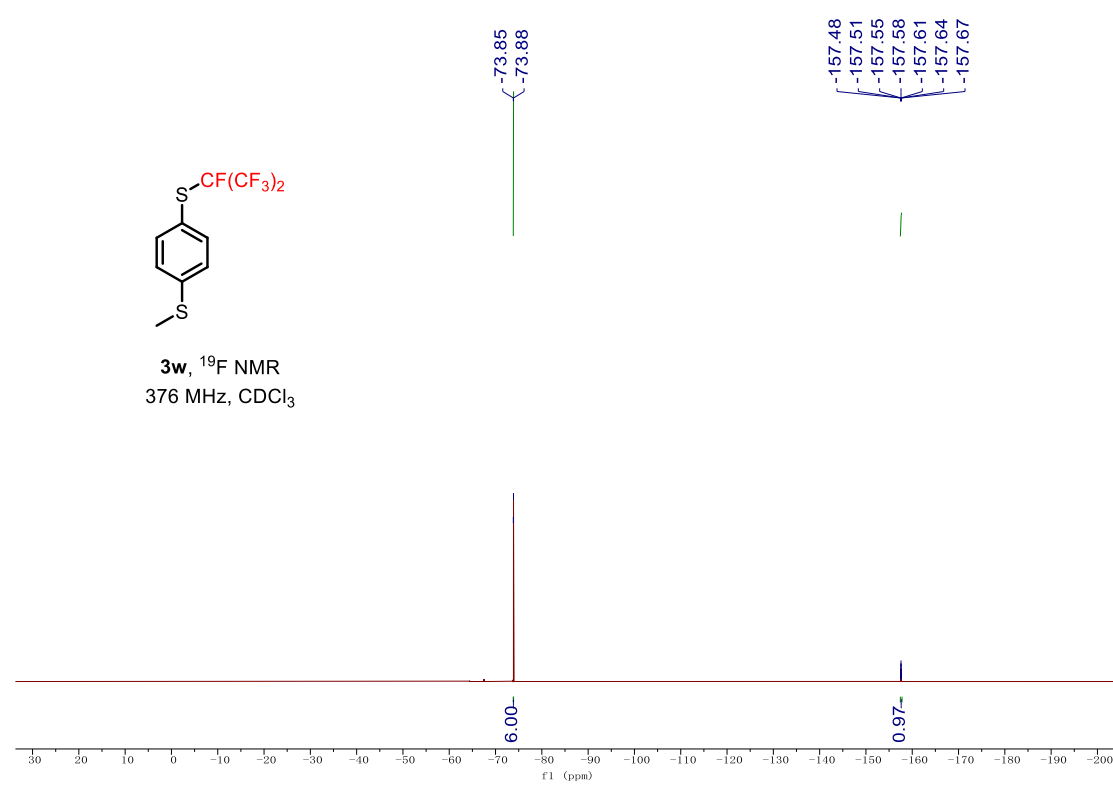



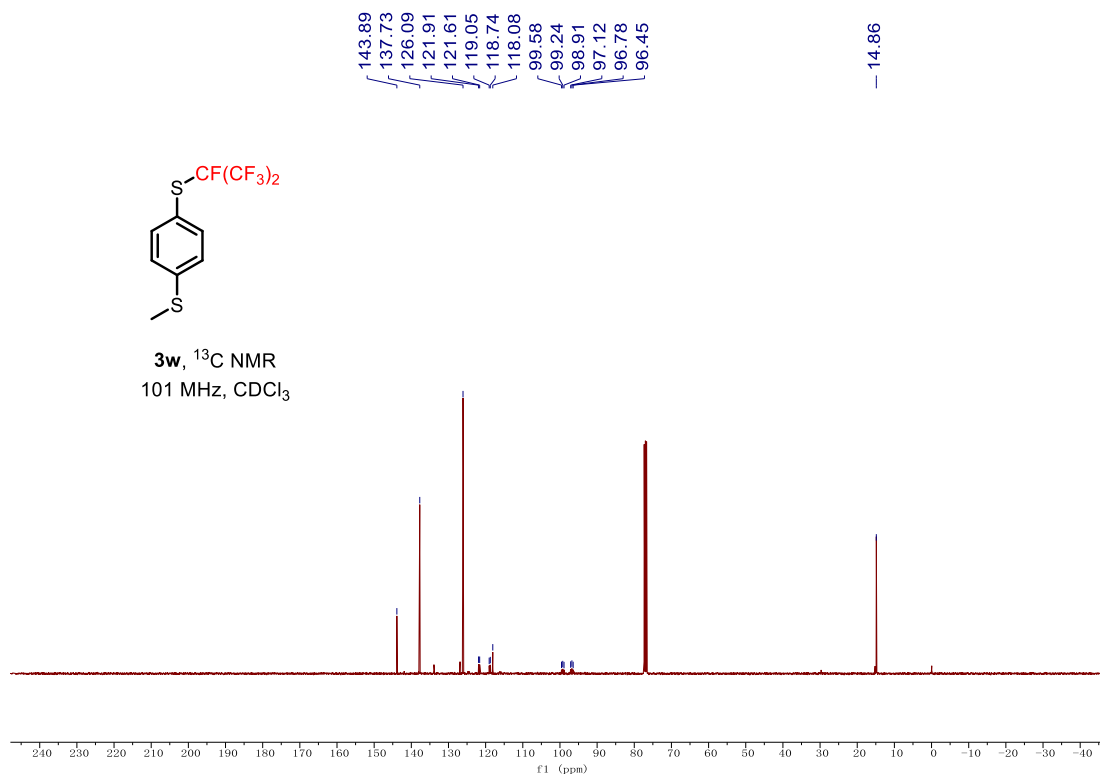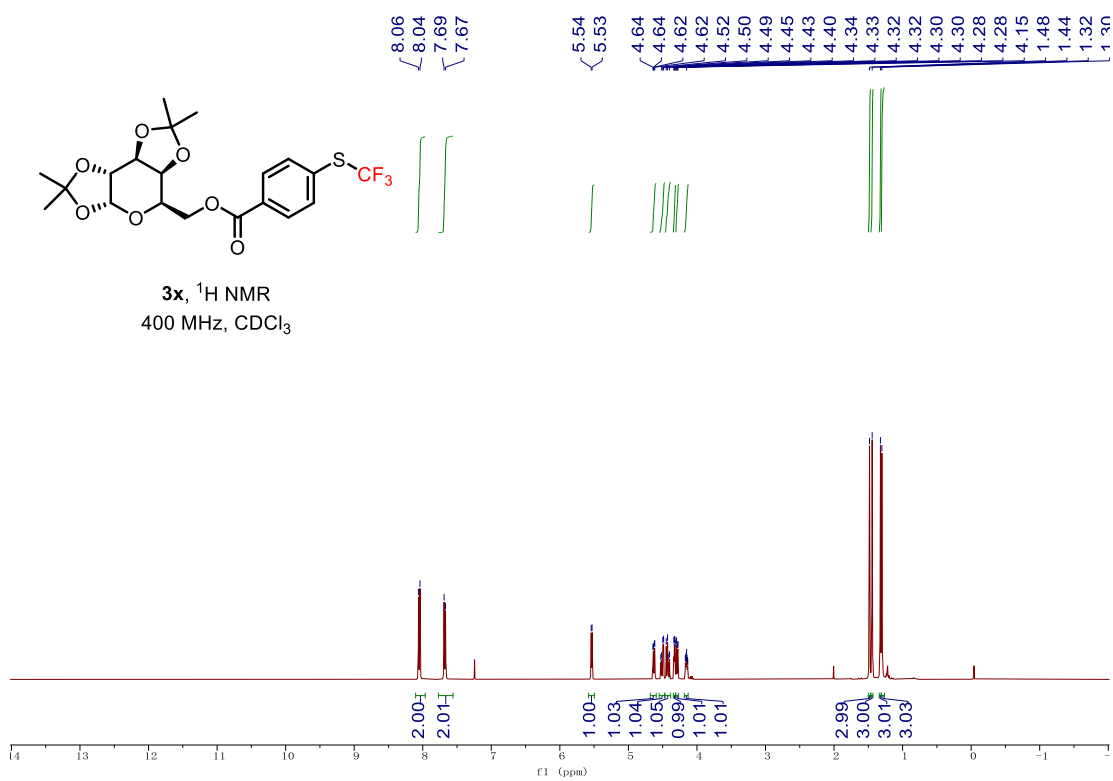

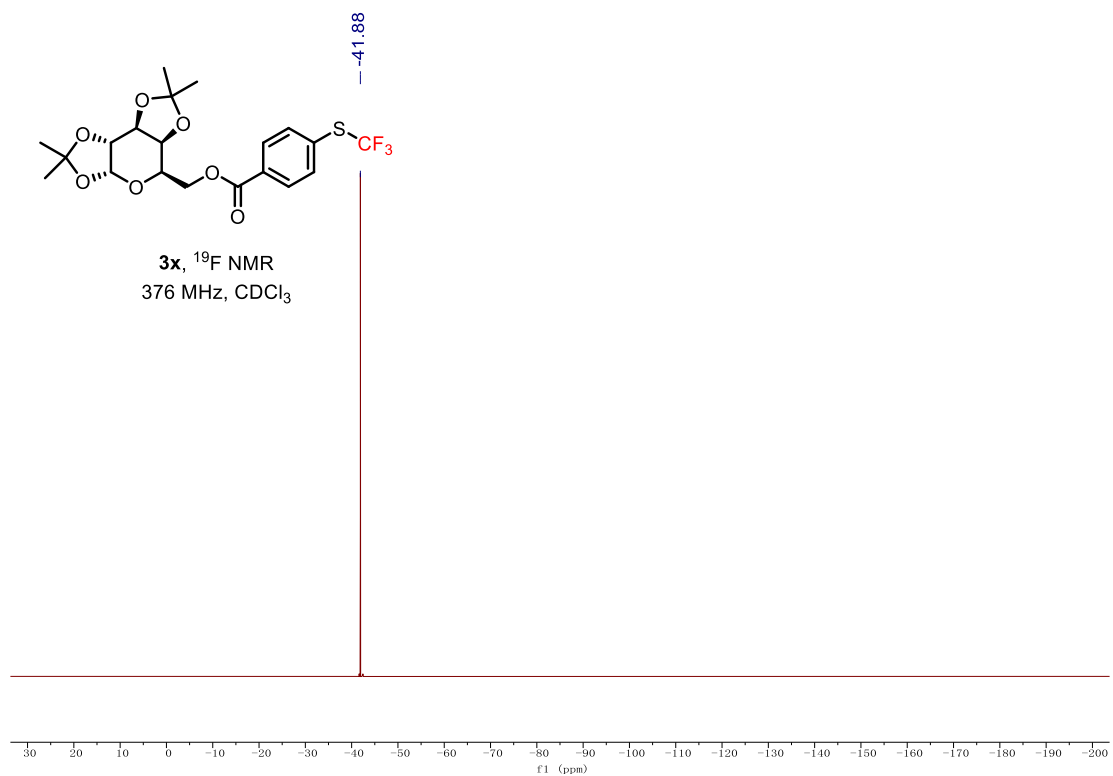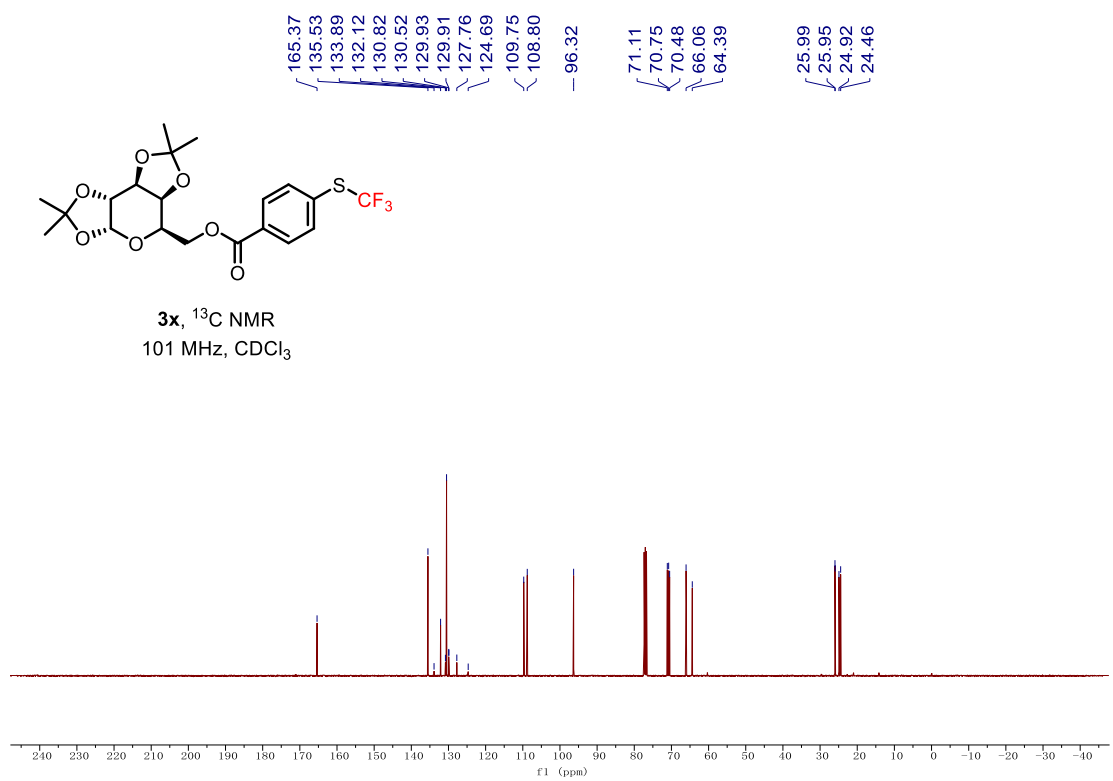

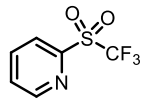

**4a**,  $^1\text{H}$  NMR  
400 MHz,  $\text{CDCl}_3$

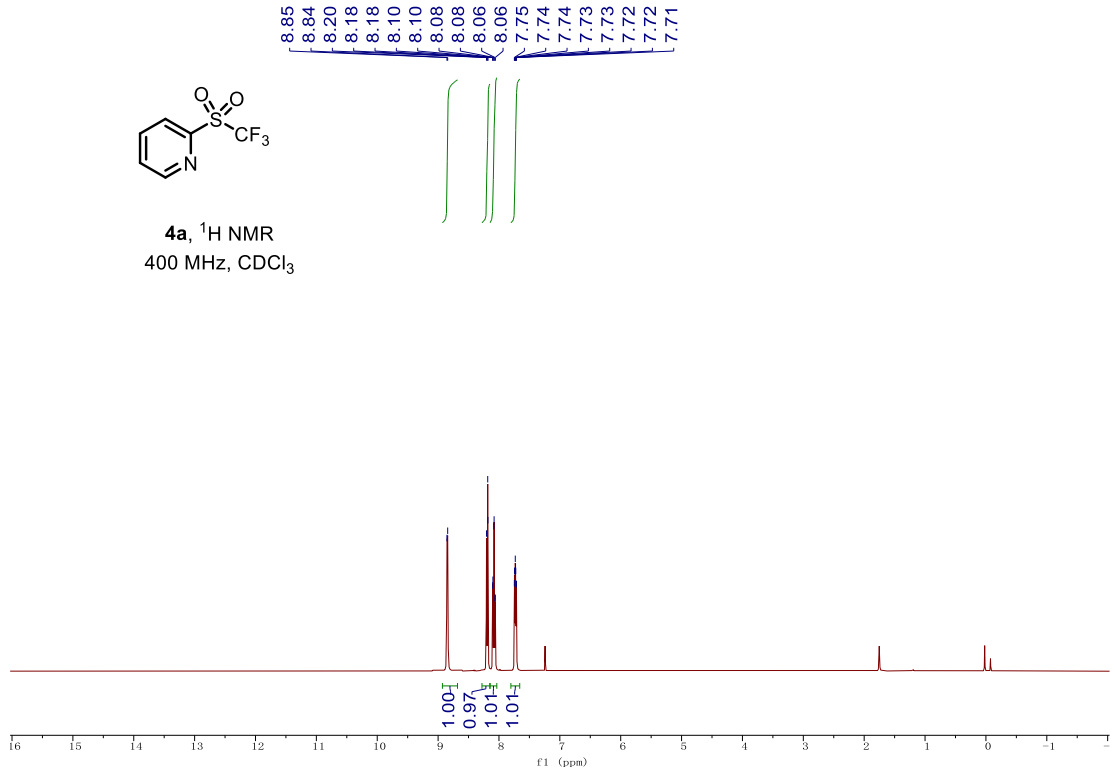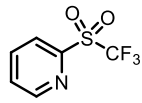

**4a**,  $^{19}\text{F}$  NMR  
376 MHz,  $\text{CDCl}_3$

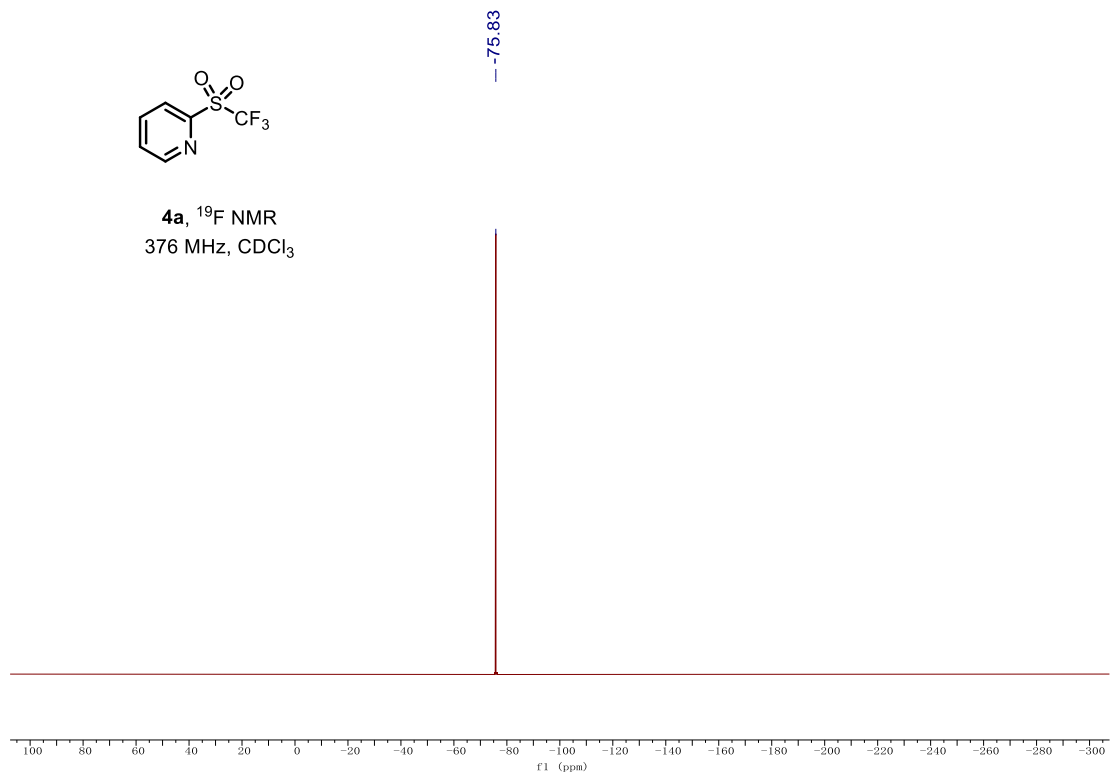

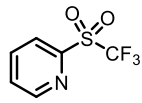

**4a**,  $^{13}\text{C}$  NMR  
101 MHz,  $\text{CDCl}_3$

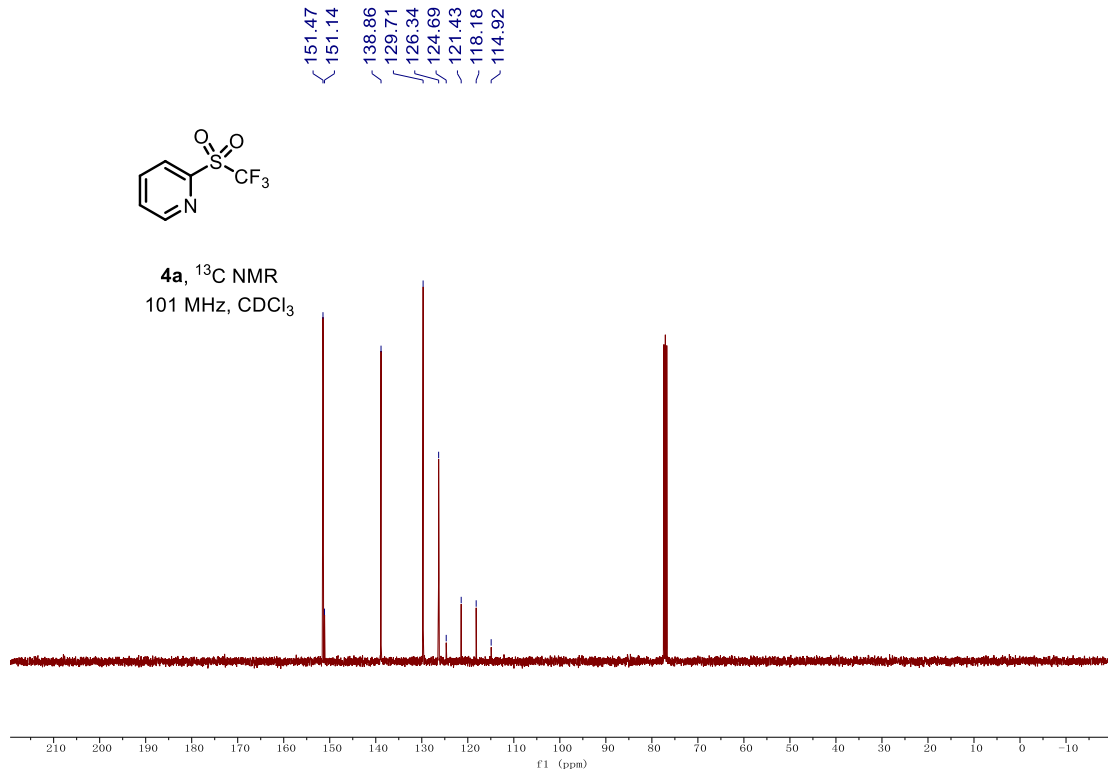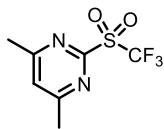

**4b**,  $^1\text{H}$  NMR  
400 MHz,  $\text{CDCl}_3$

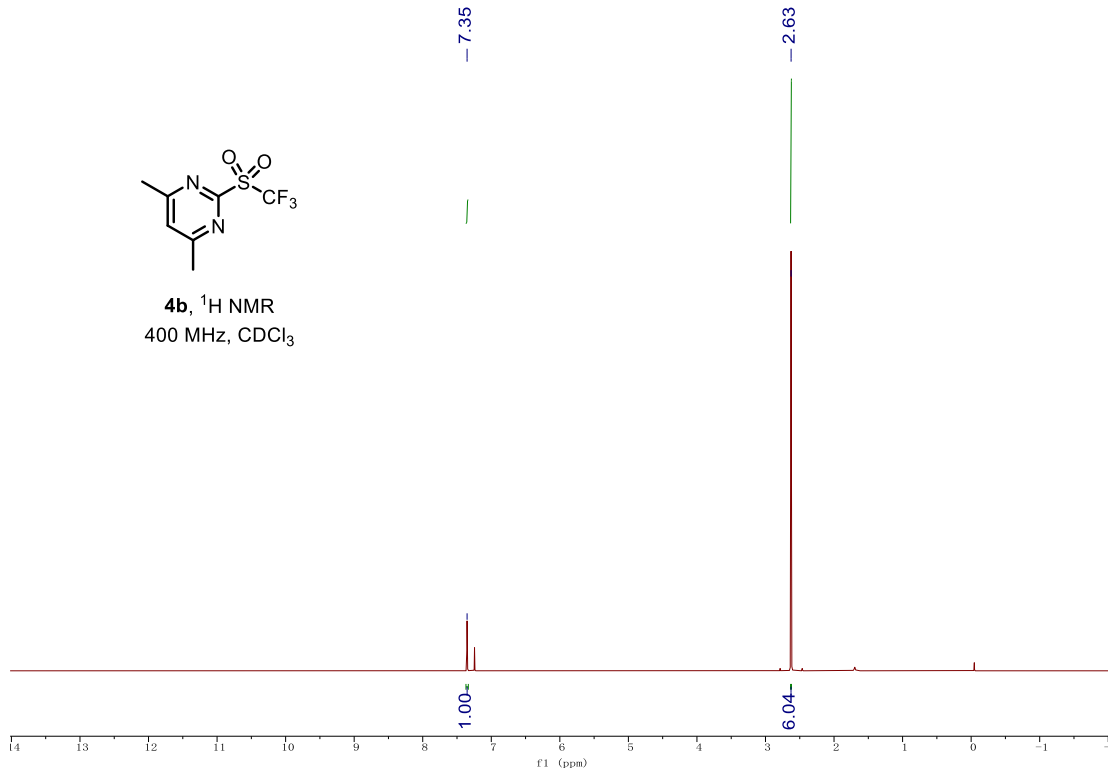

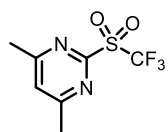

**4b**,  $^{19}\text{F}$  NMR  
376 MHz,  $\text{CDCl}_3$

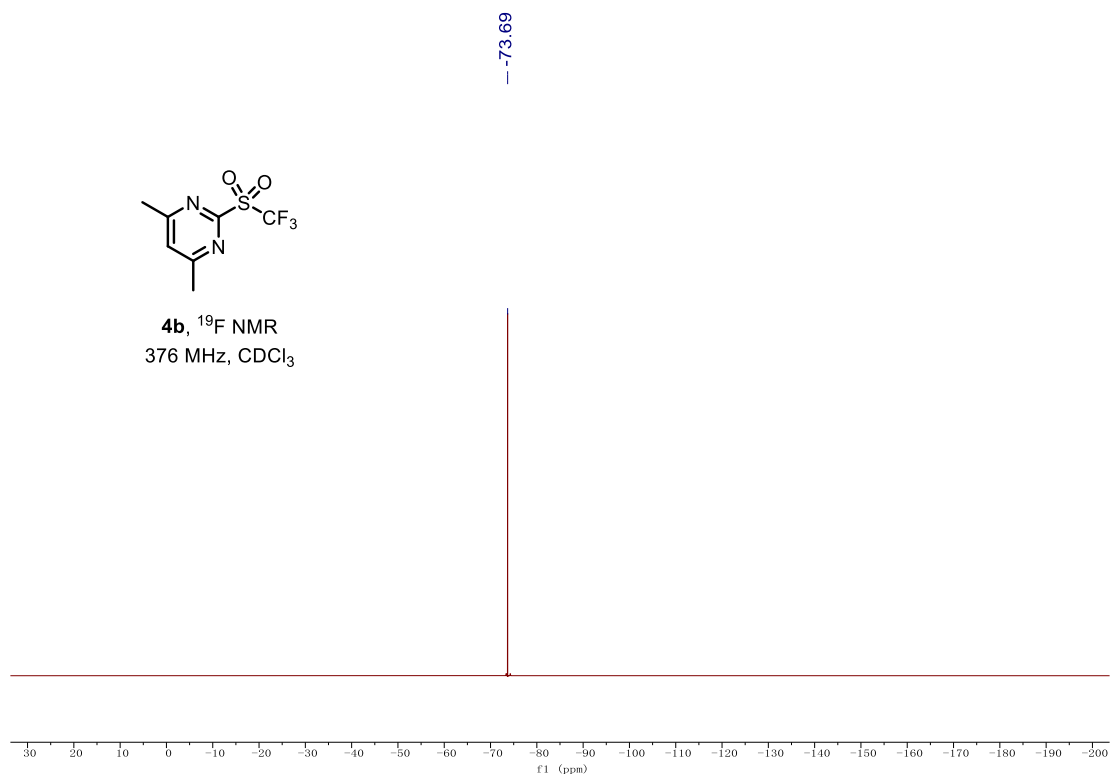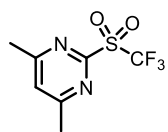

**4b**,  $^{13}\text{C}$  NMR  
101 MHz,  $\text{CDCl}_3$

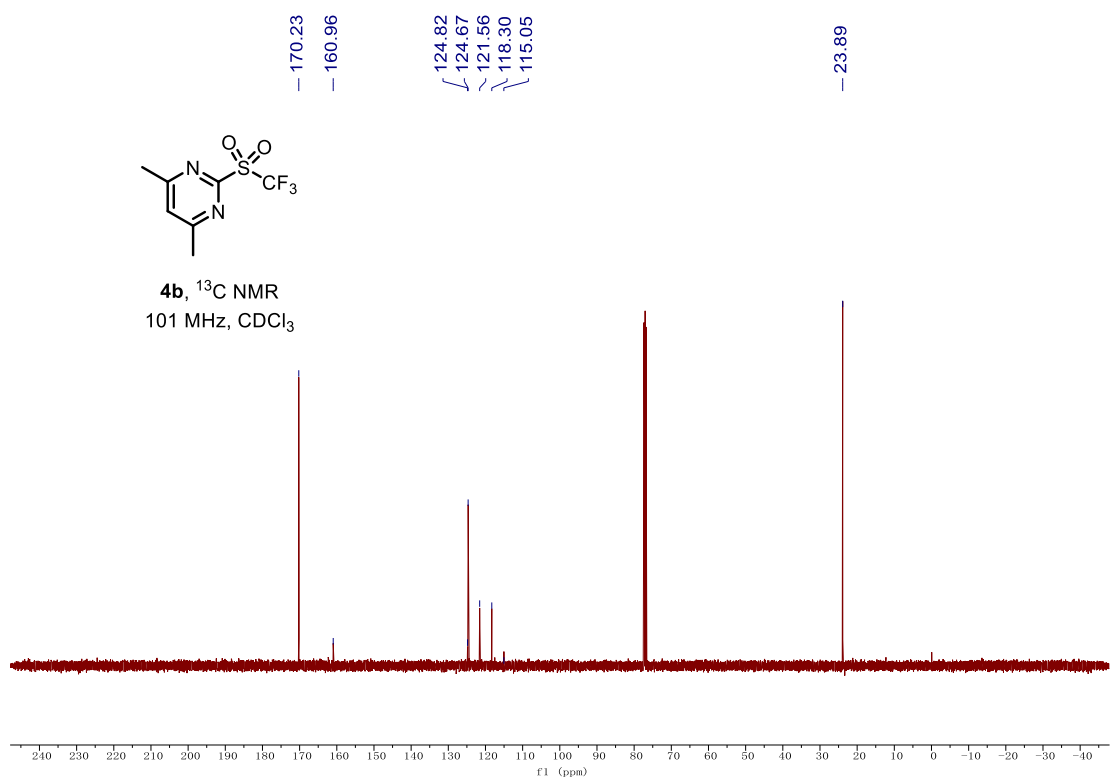

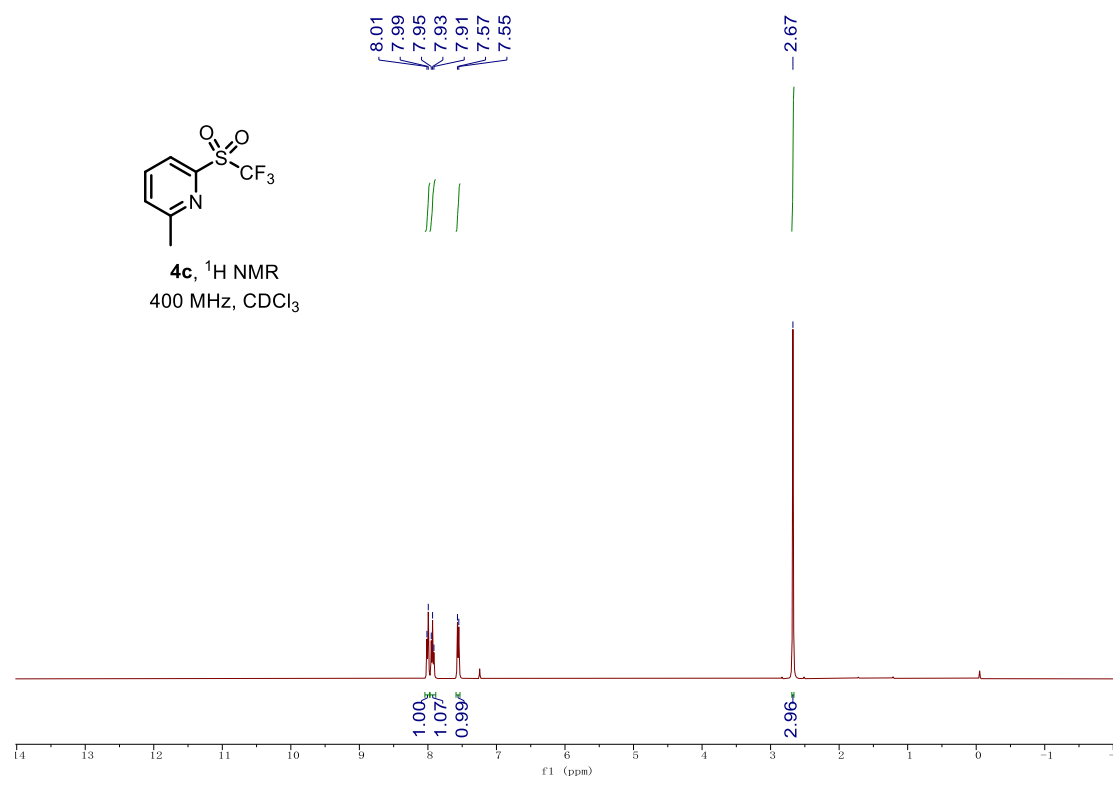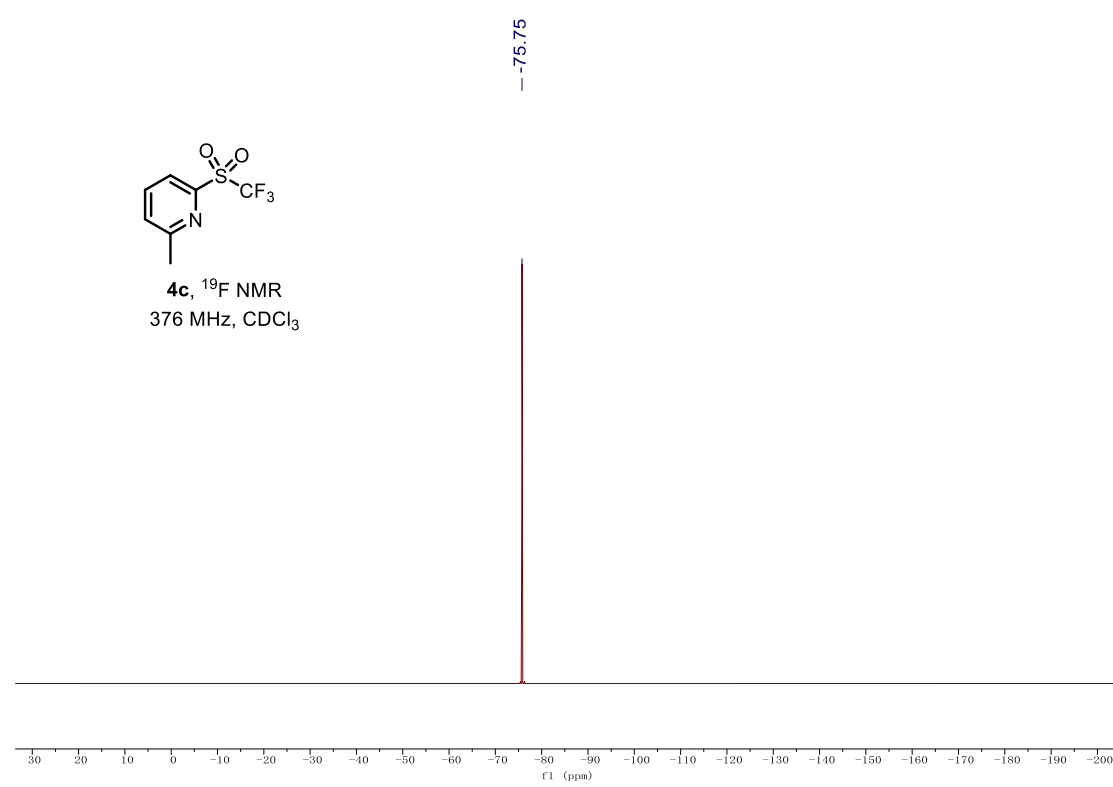

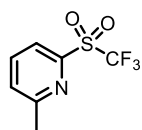

**4c**,  $^{13}\text{C}$  NMR  
101 MHz,  $\text{CDCl}_3$

161.68  
150.42  
150.40  
138.58  
129.71  
124.74  
123.44  
121.49  
118.23  
114.97

24.28

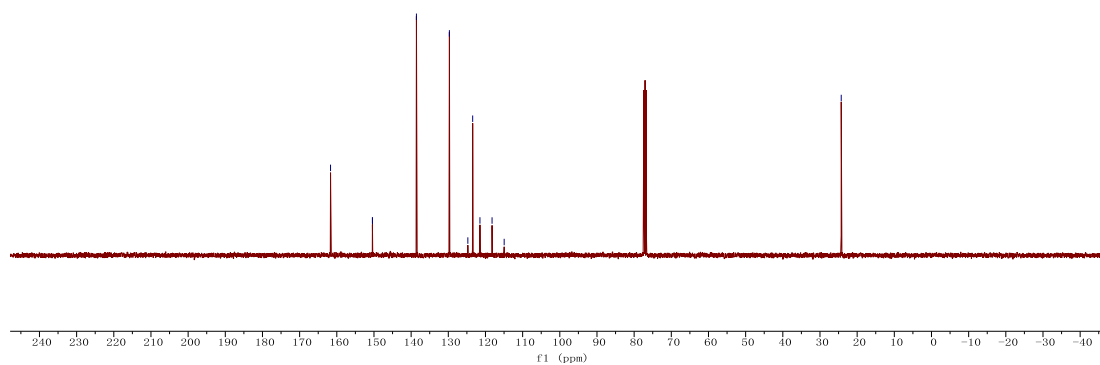

Supplement: d2cc03921d1.pdf [file d2cc03921d1.pdf]
